# Supplementary material
Source: PubMed Central journal article supplement (PMC3188285)

## Supporting Information:

# 3,5-Dimethylisoxazoles act as acetyl-lysine mimetic bromodomain ligands

David S. Hewings,<sup>†,‡</sup> Minghua Wang,<sup>†</sup> Martin Philpott,<sup>†</sup> Oleg Fedorov,<sup>†</sup> Sagar Uttarkar,<sup>†</sup> Panagis Filippakopoulos,<sup>†</sup> Sarah Picaud,<sup>†</sup> Chaitanya Vuppusetty,<sup>†</sup> Brian Marsden,<sup>†</sup> Stefan Knapp,<sup>†</sup> Stuart J. Conway<sup>‡,\*</sup> and Tom D. Heightman<sup>†,§,\*</sup>

<sup>†</sup>Nuffield Department of Clinical Medicine, Structural Genomics Consortium, University of Oxford, Old Road Campus Research Building, Roosevelt Drive, Oxford, OX3 7DQ, UK; <sup>‡</sup>Department of Chemistry, Chemistry Research Laboratory, University of Oxford, Mansfield Road, Oxford, OX1 3TA, UK; <sup>§</sup>Current address: Astex Therapeutics, 436 Cambridge Science Park, Cambridge, CB4 0QA, UK.

\*To whom correspondence should be addressed: stuart.conway@chem.ox.ac.uk, telephone: +44 (0)1865 285 109, fax: +44 (0)1865 285 002; t.heightman@astex-therapeutics.com, telephone: +44 (0)1223 226270.

### Table of Contents

|                                                                                                                                                  |     |
|--------------------------------------------------------------------------------------------------------------------------------------------------|-----|
| <b>Supporting Figure S1.</b> Mass spectra of <b>1</b>                                                                                            | S2  |
| <b>Supporting Figure S2.</b> Cytotoxicity assay                                                                                                  | S3  |
| <b>Supporting Figure S3.</b> Overlays of crystal structure of <b>2</b> , <b>4d</b> , JQ1 and comparison with predicted binding mode of <b>4d</b> | S4  |
| <b>Supporting Figure S4.</b> Selected dose-response curves                                                                                       | S5  |
| <b>Supporting Figure S5.</b> Calculation of minimum energy torsion angle                                                                         | S6  |
| <b>Supporting Scheme S1.</b> Synthesis of 4-aryl-3,5-dimethylisoxazoles <b>3a,b</b> and <b>4a</b> by direct arylation of 3,5-dimethylisoxazole   | S7  |
| <b>Supporting Scheme S2.</b> Synthesis of 3-bromoethoxybenzene <b>7</b>                                                                          | S7  |
| <b>Supporting Scheme S3.</b> Synthesis of 6-(3,5-dimethylisoxazol-4-yl)-3-methyl-3,4-dihydroquinazolin-2(1H)-one <b>1</b> .                      | S7  |
| <b>Supporting Table S1.</b> Ligand efficiency calculation                                                                                        | S8  |
| <b>Supporting Table S2.</b> Data collection and refinement statistics                                                                            | S9  |
| <b>Protein Crystallization</b>                                                                                                                   | S9  |
| <b>Data Collection and Structure Solution</b>                                                                                                    | S10 |
| <b>Further General Experimental</b>                                                                                                              | S11 |
| <b>Synthesis and Characterization of Compounds 1, 7, 8, 10-13</b>                                                                                | S12 |
| <b>Further Characterization of Compounds 3a-d, 4a-d</b>                                                                                          | S17 |
| <b>References</b>                                                                                                                                | S19 |
| <b><sup>1</sup>H and <sup>13</sup>C spectra</b>                                                                                                  | S21 |

#### Abbreviations used in Supporting Information:

BRD(1): First bromodomain of bromodomain-containing protein 4; CREBBP: c-AMP response element binding protein binding protein; DMAc: *N,N*-dimethylacetamide; DMEM: Dulbecco's modified Eagle's medium; LE: Ligand efficiency; MTT: 3-(4,5-dimethylthiazol-2-yl)-2,5-diphenyltetrazolium bromide; RuPhos: 2-dicyclohexylphosphino-2',6'-diisopropoxybiphenyl

## Supporting Figure S1. Mass spectra of **1**

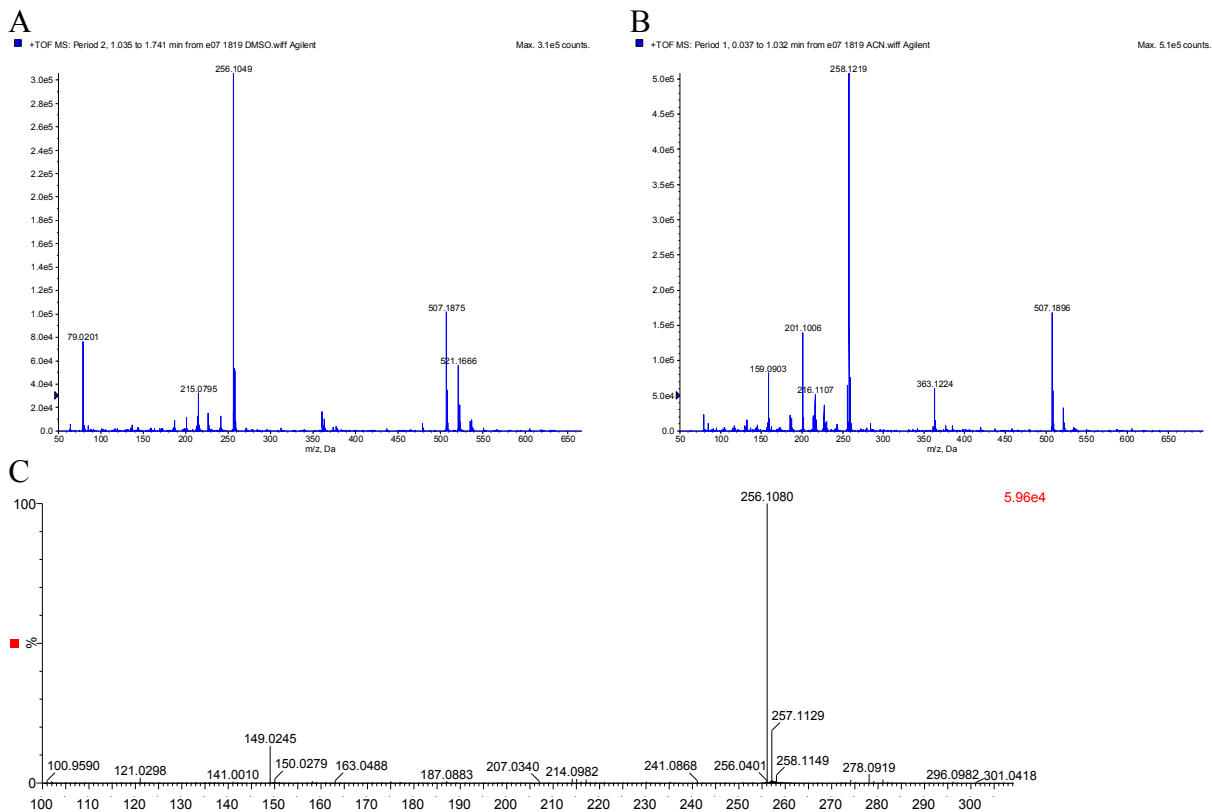

**1** is liable to oxidation under laboratory conditions. **A**: Mass spectrum of purchased **1** after storage in DMSO for one month; [M-H]<sup>+</sup> is likely to arise from oxidation at the benzylic position; **B**: Mass spectrum of freshly-prepared MeCN suspension of purchased **1**; [M+H]<sup>+</sup> is observed, but [M-H]<sup>+</sup> is not; **C**: High-resolution LCMS of resynthesized **1** after stirring in DMSO for 5 days; [M-H]<sup>+</sup> present. For **1**, calculated [M+H]<sup>+</sup>: 258.1237, [M-H]<sup>+</sup>: 256.1081. Details of MS experiments are given below (S11).

**Supporting Figure S2.** Cytotoxicity assay.

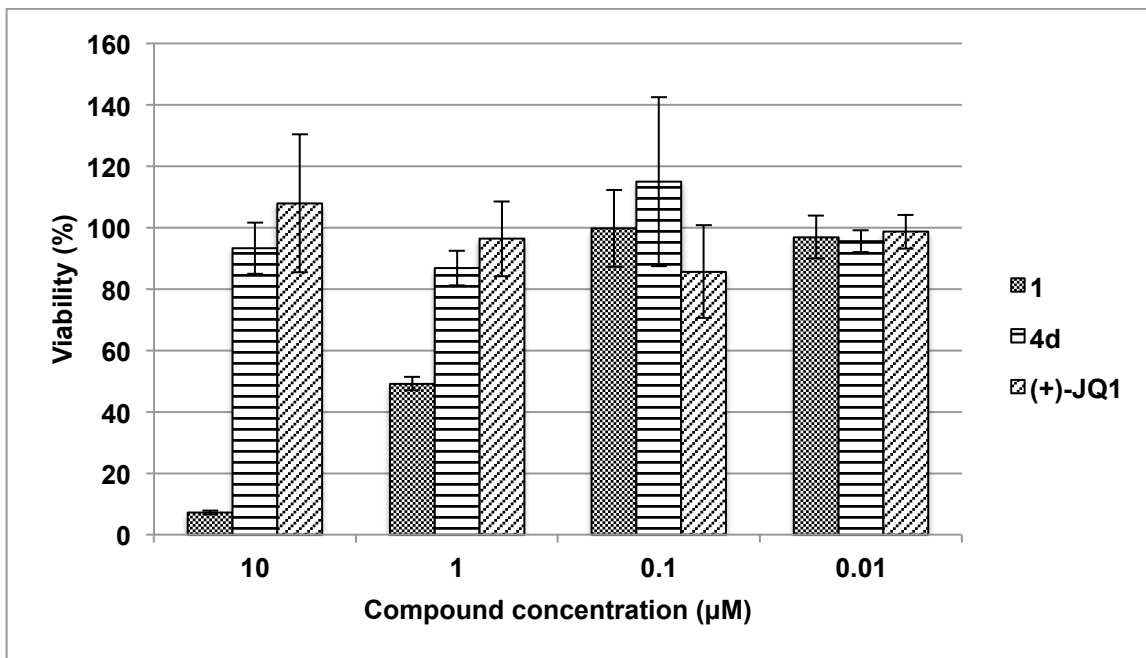

Cytotoxicity of lead compound **1**, **4d** and (+)-JQ1 in HeLa cells, as determined by MTT (3-(4,5-dimethylthiazol-2-yl)-2,5-diphenyltetrazolium bromide) assay, indicating mitochondrial reductase activity. A reduction in viability indicates cytotoxicity in this cell line. Experiments were performed in triplicate. Error bars indicate standard deviation.

**Supporting Figure S3.** Overlays of crystal structure of **2**, JQ1, and comparison with predicted binding mode of **4d**.

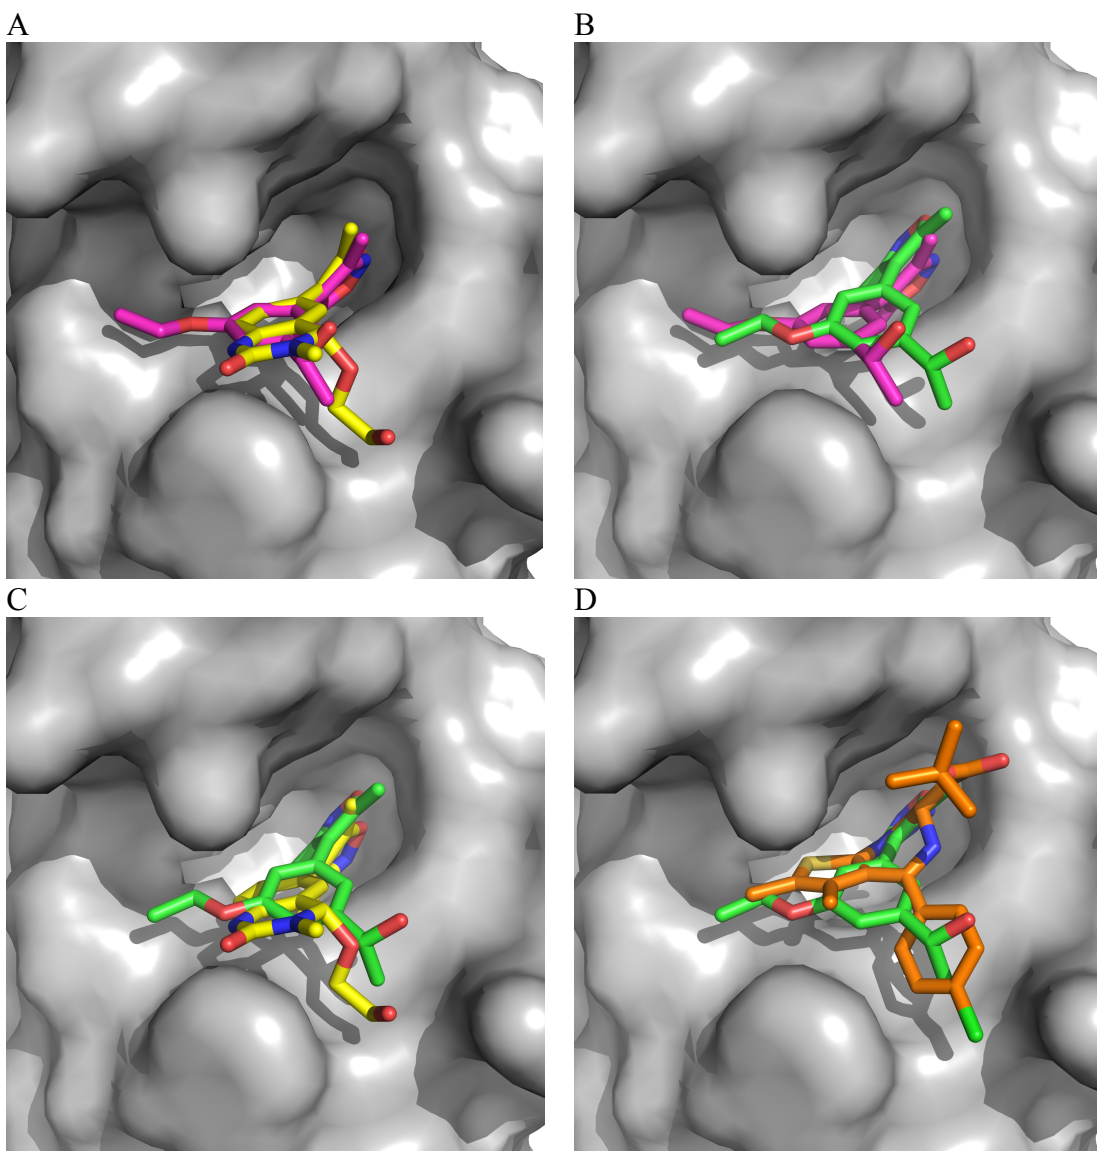

**A:** Overlay of the crystal structure of lead **2** (yellow, PDB ID: 3SVF) and predicted binding mode of compound **4d** (magenta) bound to BRD4(1); **B:** Comparison of the crystal structure of compound **4d** (green, PDB ID: 3SVG) and its predicted binding mode; **C:** Comparison of the crystal structure of lead compound **2** (yellow) and the crystal structure of final compound **4d** (green); **D:** Overlay of the crystal structures of compound **4d** and JQ1 bound to BRD4(1) (PDB ID: 3MXF).



**Supporting Figure S4.** Selected dose-response curves

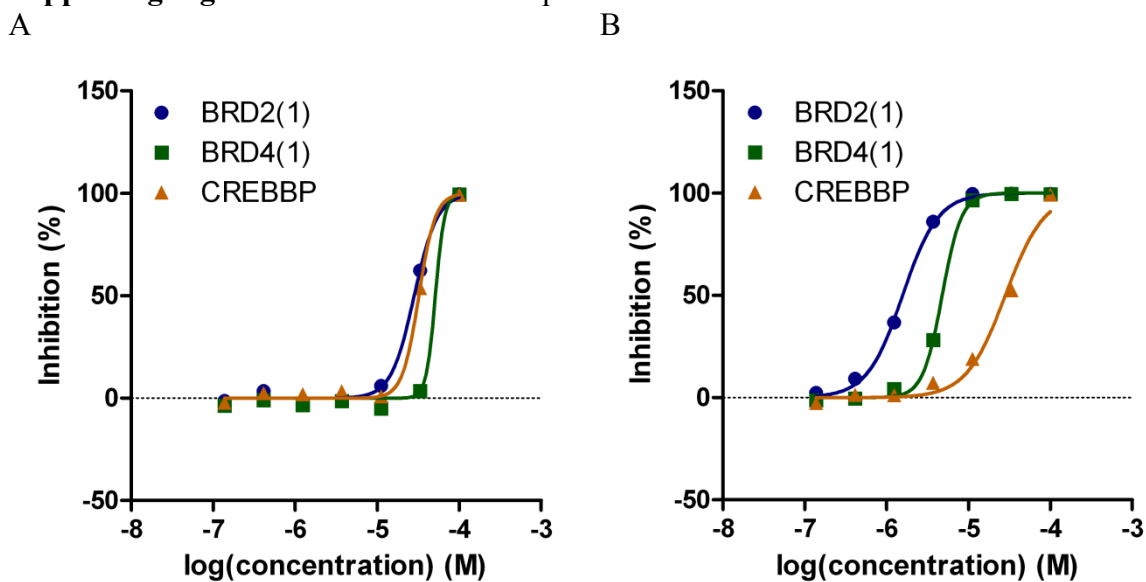

Dose-response curves for A: **4b** and B: **4d** in three bromodomains. Curves were constrained to 0% and 100% inhibition. Experiments were carried out in duplicate on the same plate; intra-experimental variation was too small to be visualized with error bars. Curves plotted in GraphPad Prism (GraphPad Software).

**Supporting Figure S5.** Calculation of minimum energy torsion angle.

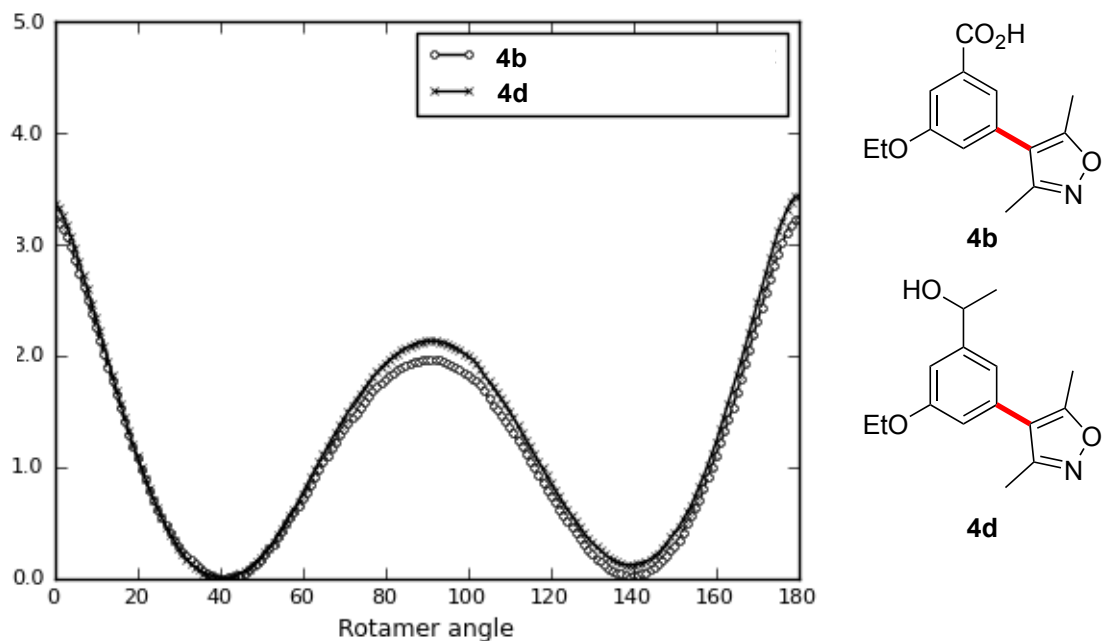

**Supporting Scheme S1.** Synthesis of 4-aryl-3,5-dimethylisoxazoles **3a-b**, **4a** by direct arylation of 3,5-dimethylisoxazole.<sup>a</sup>

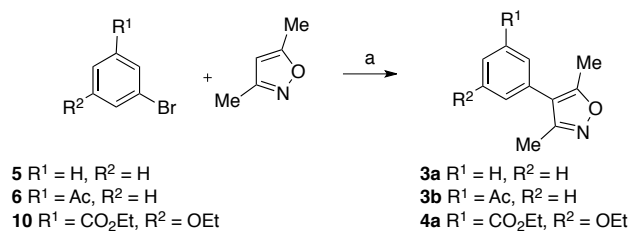

<sup>a</sup>Conditions: (a) R<sub>1</sub> = H, R<sub>2</sub> = H: PdCl<sub>2</sub>, KOAc, DMAc, 130 °C, 27 h, 69%; R<sub>1</sub> = Ac, R<sub>2</sub> = H: PdCl<sub>2</sub>, KOAc, DMAc, 130 °C, 20 h, 51%; R<sub>1</sub> = CO<sub>2</sub>Et, R<sub>2</sub> = OEt: PdCl<sub>2</sub>, KOAc, DMAc, 130 °C, 44 h, 44%.<sup>1</sup>

**Supporting Scheme S2.** Synthesis of 3-bromoethoxybenzene **7**.<sup>a</sup>

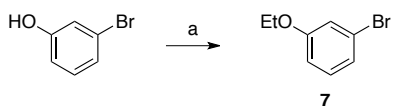

<sup>a</sup>Conditions: (a) EtBr, K<sub>2</sub>CO<sub>3</sub> MeOH, 120 °C (microwave), 20 min, 95%.<sup>2</sup>

**Supporting Scheme S3.** Synthesis of 6-(3,5-dimethylisoxazol-4-yl)-3-methyl-3,4-dihydroquinazolin-2(1H)-one **1**.<sup>a</sup>

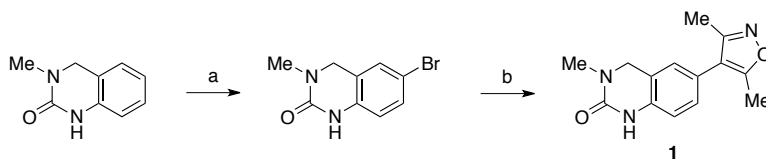

<sup>a</sup>Conditions: (a) *N*-Bromosuccinimide, DMF, rt, 2 h, 12%; (b) **8**, Na<sub>2</sub>CO<sub>3</sub>, Pd(OAc)<sub>2</sub>, RuPhos, EtOH, 110 °C (microwave), 3 h, 70%.

**Supporting Table S1.** Ligand efficiency.<sup>a</sup>

|                      | <b>1</b>               |                        | <b>4d</b>              |                        | <b>(+)-JQ1</b>        | <b>NMP</b>            |                        |
|----------------------|------------------------|------------------------|------------------------|------------------------|-----------------------|-----------------------|------------------------|
|                      | BRD4(1)                | CREBBP                 | BRD4(1)                | BRD2(1)                | BRD4(1)               | BAZ2B                 | CREBBP                 |
| IC <sub>50</sub> (M) | 4.8 × 10 <sup>-6</sup> | 3.4 × 10 <sup>-6</sup> | 4.8 × 10 <sup>-6</sup> | 1.6 × 10 <sup>-6</sup> | 77 × 10 <sup>-9</sup> | 34 × 10 <sup>-3</sup> | 2.4 × 10 <sup>-3</sup> |
| pIC <sub>50</sub>    | 5.32                   | 5.47                   | 5.32                   | 5.8                    | 7.11                  | 1.47                  | 2.64                   |
| Heavy atom count     | 19                     | 19                     | 19                     | 19                     | 31                    | 7                     | 7                      |
| LE                   | 0.39                   | 0.40                   | 0.39                   | 0.43                   | 0.32                  | 0.30                  | 0.53                   |

<sup>a</sup> pIC<sub>50</sub> = -log<sub>10</sub> IC<sub>50</sub>

$$LE = \frac{pIC_{50} \times 1.4 \text{ (kcal/mol)}}{\text{Heavy atom count}}$$

**Supporting Table S2.** Data collection and refinement statistics.<sup>a</sup>

| Data Collection                                      |                                               |                                               |                    |
|------------------------------------------------------|-----------------------------------------------|-----------------------------------------------|--------------------|
| PDB ID                                               | 3SVF                                          | 3SVG                                          | 3SVH               |
| Protein/Ligand                                       | BRD4(1)/ <b>2</b>                             | BRD4(1)/ <b>4d</b>                            | CREBBP/ <b>4b</b>  |
| Space group                                          | P2 <sub>1</sub> 2 <sub>1</sub> 2 <sub>1</sub> | P2 <sub>1</sub> 2 <sub>1</sub> 2 <sub>1</sub> | P2 <sub>1</sub>    |
| Cell dimensions: a, b, c (Å)                         | 43.56 48.98 60.28                             | 37.66 44.19 77.85                             | 42.36 61.92 58.42  |
| $\alpha$ , $\beta$ , $\gamma$ (deg)                  | 90.00 90.00 90.00                             | 90.00 90.00 90.00                             | 90.00 111.38 90.00 |
| Resolution (Å)                                       | 1.98 (2.08-1.98)                              | 1.68 (1.77-1.68)                              | 1.80 (1.90-1.80)   |
| Unique observations                                  | 9376 (1302)                                   | 15429 (2207)                                  | 24992 (3517)       |
| Completeness (%)                                     | 98.8 (96.4)                                   | 99.8 (99.0)                                   | 95.4 (92.4)        |
| Redundancy                                           | 6.5 (5.2)                                     | 4.4 (3.8)                                     | 2.7 (2.7)          |
| Rmerge                                               | 0.185 (0.745)                                 | 0.067 (0.580)                                 | 0.095 (0.265)      |
| I/ $\sigma$ I                                        | 7.5 (2.0)                                     | 13.5 (2.0)                                    | 8.1 (3.4)          |
| Refinement                                           |                                               |                                               |                    |
| Resolution (Å)                                       | 1.98                                          | 1.68                                          | 1.80               |
| R <sub>work</sub> / R <sub>free</sub> (%)            | 17.7/22.6                                     | 17.6/21.5                                     | 18.8/22.9          |
| Number of atoms<br>(protein/other/water)             | 1054/23/86                                    | 1082/31/125                                   | 1986/80/232        |
| B-factors (Å <sup>2</sup> )<br>(protein/other/water) | 23.46/24.36/26.29                             | 18.77/22.88/26.26                             | 12.49/15.21/17.80  |
| r.m.s.d bonds (Å)                                    | 0.016                                         | 0.015                                         | 0.015              |
| r.m.s.d angles (°)                                   | 1.526                                         | 1.552                                         | 1.611              |
| Ramachadran Favoured (%)                             | 98.40                                         | 98.33                                         | 100.00             |
| Allowed (%)                                          | 1.60                                          | 1.67                                          | 0.00               |
| Disallowed (%)                                       | 0.00                                          | 0.00                                          | 0.00               |

<sup>a</sup> Values in parentheses correspond to the highest resolution shell.

**Protein crystallization:** Aliquots of the purified proteins were set up for crystallization using a mosquito® crystallization robot (TTP Labtech, Royston UK). Coarse screens were typically setup onto Greiner 3-well plates using three different drop ratios of precipitant to protein per condition (100+50 nL, 75+75 nL and 50+100 nL). Initial hits were optimized further scaling up the drop sizes. All crystallizations were carried out using the sitting drop vapor diffusion method at 4 °C. CREBBP crystals with **4b** were grown by mixing 150 nL of the protein (10.6 mg/mL and 10 mM final ligand

concentration) with an equal volume of reservoir solution containing 0.25 M potassium thiocyanate, 10% PEG3350 and 5% ethylene glycol. BRD4(1) crystals with **2** were grown by mixing 50 nL of protein (10.3 mg/mL and 5 mM final ligand concentration) with 100 nL of reservoir solution containing 0.2 M sodium acetate, 0.1 M Bis-Tris pH 8.5, 20% PEG3350 and 10% ethylene glycol. BRD4(1) crystals with **4d** were grown by mixing 75 nL of protein (9.9 mg/mL and 5 mM final ligand concentration) with an equal volume of reservoir solution containing 0.2 M sodium sulfate, 0.1 M BT-propane pH 8.5, 20% PEG3350 and 10% ethylene glycol. In all cases diffraction quality crystals grew within a few days.

**Data Collection and Structure Solution:** All crystals were cryo-protected using the well solution supplemented with additional ethylene glycol and were flash frozen in liquid nitrogen. Data were collected in-house on a Rigaku FRE rotating anode system equipped with a RAXIS-IV detector at 1.52 Å. Indexing and integration was carried out using MOSFLM<sup>3</sup> and scaling was performed with SCALA.<sup>4</sup> Initial phases were calculated by molecular replacement with PHASER<sup>5</sup> using the known models of BRD4(1) (PDB ID: 2OSS) and CREBBP (PDB ID: 3DWY). Initial models were built by ARP/wARP<sup>6</sup> followed by manual building in COOT.<sup>7</sup> Refinement was carried out in REFMAC5.<sup>8</sup> In all cases thermal motions were analyzed using TLSMD<sup>9</sup> and hydrogen atoms were included in late refinement cycles. Data collection and refinement statistics can be found in Supporting Table S2. The models and structure factors have been deposited with PDB accession codes: 3SVF (BRD4(1)/**2**), 3SVG (BRD4(1)/**4d**), 3SVH (CREBBP/**4b**).

## Further General Experimental

**Mass spectra** of purchased **1** (Supporting Figure S1A, B) were obtained using an Agilent MSD-ToF electrospray ionisation orthogonal time-of-flight mass spectrometer. The sample was diluted 1:100 (v/v) in LC-MS grade acetonitrile and infused directly into the ion source at a flow rate of 3  $\mu$ L per minute using a syringe pump. The instrument was configured with the standard ESI source and operated in positive ion mode. Data analysis was performed using Quantitative Analysis software (Agilent Technologies Inc). LCMS of resynthesized **1** (Supporting Figure S1C) was obtained using a Waters Nano Acquity nano-LC system interfaced to a Waters Synapt mass spectrometer *via* an electrospray source. LC conditions were: Waters 1.7  $\mu$ M BEH C18 75  $\mu$ M  $\times$  150 mm column with a binary solvent system using water + 0.1% formic acid and MeCN. Data analysis was performed with using Synapt software (Waters Corporation).

**Analytical thin layer chromatography** (TLC) was carried out on Merck silica gel 60 F<sub>254</sub> aluminum-supported thin layer chromatography sheets. Visualisation was by absorption of UV light ( $\lambda_{\text{max}}$  254 nm), or thermal development after dipping in an aqueous solution of potassium permanganate, potassium carbonate and sodium hydroxide.

**Flash column chromatography** was performed on a Biotage SP1 or SP4 system using KP-Sil™ cartridges.

**Anhydrous solvents** were obtained under the following conditions: dry DMF and dry MeOH were purchased from Sigma-Aldrich UK in SureSeal™ bottles and used without further purification; anhydrous THF was distilled from sodium and benzophenone in a recycling still and stored over activated 3 Å molecular sieves under an argon atmosphere;

Dry DMAc (Sigma) was degassed by repeated freeze-thaw cycles and stored over activated 3 Å molecular sieves under an argon atmosphere. EtOH was degassed by repeated freeze-thaw cycles and stored under an argon atmosphere, but was not dried.

**Chemicals** were purchased from Acros UK, Sigma-Aldrich UK, Alfa Aesar UK, Fisher UK or Fluka UK. Where appropriate and if not stated otherwise, all non-aqueous reactions were performed in a flame-dried flask under an inert atmosphere of nitrogen or argon, using a double vacuum manifold with the inert gas passing through a bed of activated 4 Å molecular sieves and self-indicating silica gel. K<sub>2</sub>CO<sub>3</sub> and Na<sub>2</sub>CO<sub>3</sub> were dried in an oven prior to use. *N,O*-Dimethylhydroxylamine hydrochloride was dried in a vacuum desiccator prior to use.

***In vacuo*** refers to the use of a rotary evaporator attached to a diaphragm pump. Brine refers to a saturated aqueous solution of sodium chloride. Petroleum ether refers to the fraction boiling between 30–40 °C unless otherwise stated.

### **Synthesis and characterization of compounds 1, 7, 8, 10-13**

#### 6-(3,5-Dimethylisoxazol-4-yl)-3-methyl-3,4-dihydroquinazolin-2(1*H*)-one 1

To a solution of 3-methyl-3,4-dihydroquinazolin-2(1*H*)-one (5.00 g, 31.0 mmol) in DMF (120 mL) was added *N*-bromosuccinimide (6.61 g, 37.1 mmol). The reaction was stirred at rt for 2 h then concentrated *in vacuo*. The resulting residue was resuspended in EtOAc, washed with H<sub>2</sub>O (3 × 100 mL), dried and concentrated *in vacuo*. Purification by silica gel column chromatography (5:1 CH<sub>2</sub>Cl<sub>2</sub>:EtOAc) gave 6-bromo-3-methyl-3,4-dihydroquinazolin-2(1*H*)-one as a colorless solid (916 mg, 12%); mp 195–197 °C (EtOH); <sup>1</sup>H NMR (500 MHz, DMSO-*D*<sub>6</sub>) 2.85 (s, 3H) 4.39 (s, 2H), 6.70–6.74 (m, 1H), 7.28–7.32 (m, 2H), 9.33 (s, 1H); <sup>13</sup>C NMR (125 MHz, DMSO-*D*<sub>6</sub>) 33.8, 49.2, 112.0,



115.2, 120.3, 128.1, 130.4, 137.3, 153.3; HRMS  $m/z$  ( $ES^+$ ) found  $[M+H]^+$  240.9969,  $C_9H_{10}^{79}BrN_2O^+$  requires 240.9971;  $m/z$  ( $ES^+$ ) 263 ( $[^{79}M+Na]^+$ , 56), 265 ( $[^{81}M+Na]^+$ , 55), 295 ( $[^{79}M+MeOH+Na]^+$ , 12), 297 ( $[^{81}M+MeOH+Na]^+$ , 12), 503 ( $[^{79}M+Na]^+$ , 53), 505 ( $[^{79}M+^{81}M+Na]^+$ , 100), 507 ( $[^{81}M+Na]^+$ , 52). Anal. Calcd for  $C_9H_9BrN_2O$ : C, 44.8; H, 3.8; N, 11.6. Found: C, 44.8; H, 3.7; N, 11.6.

To a dry 2-5 mL microwave vial were added **8** (93 mg, 456  $\mu$ mol), 6-bromo-3-methyl-3,4-dihydroquinazolin-2(1*H*)-one (100 mg, 415  $\mu$ mol), Pd(OAc)<sub>2</sub> (1 mg, 4  $\mu$ mol), RuPhos (6 mg, 13  $\mu$ mol) and anhydrous Na<sub>2</sub>CO<sub>3</sub> (88 mg, 830  $\mu$ mmol). The vial was sealed and purged with argon (3  $\times$  evacuate/fill). Degassed EtOH (2.3 mL) was added by syringe, and the mixture was heated at 110 °C for 3 h with microwave irradiation.

Purification of the crude reaction mixture by silica gel column chromatography (gradient elution, gradient 60  $\rightarrow$  100% EtOAc/petroleum ether) gave **1** as a colorless solid (68 mg, 64%); mp 224-226 °C (MeOH); <sup>1</sup>H NMR (CDCl<sub>3</sub>) 2.24 (s, 3H), 2.38 (s, 3H), 3.07 (s, 3H), 4.50 (s, 2H), 6.83 (d,  $J$  = 8.1 Hz, 1H), 6.91 (s, 1H), 7.05 (dd,  $J$  = 8.1, 1.8 Hz, 1H), 8.15 (s, 1H); <sup>13</sup>C NMR (CDCl<sub>3</sub>) 10.8, 11.5, 34.6, 50.8, 114.2, 116.1, 117.8, 123.8, 126.0, 129.1, 136.6, 154.5, 158.7, 165.0; HRMS  $m/z$  ( $ES^+$ ) found 280.1055;  $C_{14}H_{15}N_3NaO_2$  requires  $M^+$  280.1056.  $m/z$  ( $ES^+$ ) 258 ( $[M+H]^+$ , 28), 280 ( $[M+Na]^+$ , 86), 312 ( $[M+Na+MeOH]^+$ , 85), 537 ( $[2M+Na]^+$ , 100). Anal. Calcd for  $C_{14}H_{15}N_3O_2$ : C, 65.4; H, 5.9; N, 16.3. Found: C, 65.2; H, 5.9; N, 16.2.

#### 1-Bromo-3-ethoxybenzene 7

To a dry 2-5 mL microwave vial were added anhydrous K<sub>2</sub>CO<sub>3</sub> (829 mg, 6.00 mmol), 3-bromophenol (1.04 g, 637  $\mu$ L, 6.00 mmol), EtBr (981 mg 672  $\mu$ L, 9.00 mmol) and anhydrous MeOH (1.8 mL) under a nitrogen atmosphere. The vial was sealed, and the

mixture stirred at 120 °C for 20 min with microwave irradiation, then concentrated *in vacuo*. The residues were extracted with 40-60 °C petroleum ether (3 × 15 mL) and concentrated *in vacuo* to give **7** as a pale yellow oil (1.14 g, 95%); <sup>1</sup>H NMR (500 MHz, CDCl<sub>3</sub>) 1.42 (t, *J* = 7.0 Hz, 3H), 4.02 (q, *J* = 7.0 Hz, 2H), 6.83 (ddd, *J* = 8.1, 2.3, 1.0 Hz, 1H), 7.05-7.08 (m, 2H), 7.14 (dd, *J* = 8.1, 8.1 Hz, 1H); <sup>13</sup>C NMR (100 MHz, CDCl<sub>3</sub>) 14.7, 63.7, 113.6, 117.7, 122.8, 123.6, 130.5, 159.7; HRMS *m/z* (FI<sup>+</sup>) found M<sup>+</sup> 199.9838, 201.9817; C<sub>8</sub>H<sub>9</sub><sup>79</sup>BrO requires M<sup>+</sup> 199.9837, C<sub>8</sub>H<sub>9</sub><sup>81</sup>BrO requires M<sup>+</sup> 201.9811. Anal. Calcd for C<sub>8</sub>H<sub>9</sub>BrO: C, 47.8; H, 4.5. Found: C, 47.7; H, 4.4.

Potassium (3,5-dimethylisoxazol-4-yl)trifluoroborate **8**<sup>10</sup>

To a suspension of 3,5-dimethylisoxazol-4-ylboronic acid (254 mg, 1.80 mmol) in MeOH (1.0 mL) at 0 °C was added KHF<sub>2</sub> (420 mg, 5.38 mmol). H<sub>2</sub>O (1.20 mL) was then added dropwise. The solution was warmed to rt and stirred for 10 min, then concentrated and dried overnight *in vacuo*. The crude solid was purified by Soxhlet extraction (16 h) with acetone (15 mL). The collected solvent was concentrated *in vacuo*, and the residues redissolved the minimum amount of acetone (40 mL). The product was precipitated by the addition of Et<sub>2</sub>O (60 mL) and collected by filtration. The filtrate was concentrated *in vacuo*, redissolved in acetone (5 mL) and further product was precipitated by the addition of Et<sub>2</sub>O (20 mL) and collected by filtration. The combined solids were dried *in vacuo* to give **8** as a powdery colorless solid (312 mg, 85%); mp >275 °C (lit. >200 °C)<sup>10</sup>; <sup>1</sup>H NMR (400 MHz, DMSO-*D*<sub>6</sub>) 2.05 (s, 3H), 2.20 (s, 3H); <sup>11</sup>B NMR (160 MHz, DMSO-*D*<sub>6</sub>) 2.33 (q, *J* = 49 Hz); <sup>19</sup>F NMR (470 MHz, DMSO-*D*<sub>6</sub>) -134.8–-134.2; *m/z* (ES<sup>-</sup>) 164 ([M-K]<sup>-</sup>, 100), 351 ([2M-2K+Na]<sup>-</sup>, 43), 367 ([2M-K]<sup>-</sup>, 22). Anal. Calcd for C<sub>5</sub>H<sub>6</sub>BF<sub>3</sub>KNO: C,

29.6; H, 3.0; N, 6.9. Found: C, 29.7; H, 2.9; N, 6.8. These data are in good agreement with the literature values.<sup>10</sup>

### Ethyl 3-bromo-5-ethoxybenzoate 10

To a dry 10-20 mL microwave vial were added 3-bromo-5-hydroxybenzoic acid **9** (1.30 g, 5.99 mmol), anhydrous K<sub>2</sub>CO<sub>3</sub>, anhydrous DMF (5 mL) and EtBr (1.96 g, 1.34 mL, 18.0 mmol) under a nitrogen atmosphere. The vial was sealed, and the mixture stirred at 100 °C for 15 min, then concentrated *in vacuo*. The mixture was diluted with H<sub>2</sub>O (40 mL) and extracted with EtOAc (3 × 40 mL). The combined organic layers were washed with H<sub>2</sub>O (2 × 120 mL) and brine (120 mL), dried (MgSO<sub>4</sub>), filtered, and concentrated *in vacuo* to give **10** as an orange solid (1.57 g, 96%); mp 43-44 °C (EtOAc); <sup>1</sup>H NMR (500 MHz, CDCl<sub>3</sub>) 1.39 (t, *J* = 7.2 Hz, 3H), 1.42 (t, *J* = 7.0 Hz, 3H), 4.06 (q, *J* = 7.0 Hz, 2H), 4.37 (q, *J* = 7.2 Hz, 2H), 7.22 (dd, *J* = 2.4, 1.8 Hz, 1H), 7.49 (dd, *J* = 2.4, 1.5 Hz, 1H), 7.73 (dd, *J* = 1.8, 1.5 Hz, 1H); <sup>13</sup>C NMR (100 MHz, CDCl<sub>3</sub>) 14.3, 14.6, 61.4, 64.1, 114.1, 122.4, 122.6, 124.7, 133.0, 159.6, 165.3; HRMS *m/z* (ES<sup>+</sup>) found [M+Na]<sup>+</sup> 294.9931, 296.9925, C<sub>11</sub>H<sub>13</sub><sup>79</sup>BrNaNO<sub>3</sub> requires M<sup>+</sup> 294.9940, C<sub>11</sub>H<sub>13</sub><sup>81</sup>BrNaNO<sub>3</sub> requires M<sup>+</sup> 296.9920; *m/z* (ES<sup>+</sup>) 295 ([<sup>79</sup>M+Na]<sup>+</sup>, 100), 297 ([<sup>81</sup>M+Na]<sup>+</sup>, 97), 567 ([2<sup>79</sup>M+Na]<sup>+</sup>, 42), 569 ([<sup>79</sup>M+<sup>81</sup>M+Na]<sup>+</sup>, 78), 571 ([2<sup>81</sup>M+Na]<sup>+</sup>, 37). Anal. Calcd for C<sub>11</sub>H<sub>13</sub>BrNO<sub>3</sub>: C, 48.4; H, 4.8. Found: C, 48.3; H, 4.8.

### 3-Bromo-5-ethoxybenzoic acid 11

To a solution of **10** (500 mg, 1.83 mmol) in THF (2 mL) were added H<sub>2</sub>O (1 mL) and LiOH (66 mg, 2.75 mmol), and the mixture was stirred for 23 h at rt. Aqueous HCl (1 M, 10 mL) was then added, and the mixture extracted with EtOAc (3 × 10 mL). The combined organic layers were washed with brine (30 mL), dried (MgSO<sub>4</sub>), filtered, and

concentrated *in vacuo* to give **11** as a pale yellow solid (425 mg, 95%); mp 139-143 °C (EtOAc); <sup>1</sup>H NMR (400 MHz, CDCl<sub>3</sub>) 1.44 (t, *J* = 7.0 Hz, 3H), 4.09 (q, *J* = 7.0 Hz, 2H), 7.30 (dd, *J* = 2.5, 1.8 Hz, 1H), 7.55 (dd, *J* = 2.5, 1.4 Hz, 1H), 7.83 (dd, *J* = 1.8, 1.4 Hz, 1H); <sup>13</sup>C NMR (126 MHz, CDCl<sub>3</sub>) 14.6, 64.2, 114.5, 122.8, 123.5, 125.3, 131.6, 159.7, 170.3; HRMS *m/z* (ES<sup>-</sup>) found [M-H]<sup>-</sup> 242.9962, 244.9642; C<sub>9</sub>H<sub>9</sub><sup>79</sup>BrO<sub>3</sub> requires M<sup>-</sup> 242.9962, C<sub>9</sub>H<sub>9</sub><sup>81</sup>BrO<sub>3</sub> requires M<sup>-</sup> 244.9642; *m/z* (ES<sup>-</sup>) 243 ([<sup>79</sup>M]<sup>-</sup>, 96), 245 ([<sup>81</sup>M]<sup>-</sup>, 100), 487 ([<sup>279</sup>M]<sup>-</sup>, 6) 489 ([<sup>79</sup>M+<sup>81</sup>M]<sup>-</sup>, 13), 491 ([<sup>281</sup>M]<sup>-</sup>, 6), 509 ([<sup>279</sup>M-2H+Na]<sup>-</sup>, 45), 511 ([<sup>79</sup>M+<sup>81</sup>M-2H+Na]<sup>-</sup>, 80), 513 ([<sup>281</sup>M-2H+Na]<sup>-</sup>, 37). Anal. Calcd for C<sub>9</sub>H<sub>9</sub>BrO<sub>3</sub>: C, 44.1; H, 3.7. Found: C, 44.0; H, 3.6.

### 3-Bromo-5-ethoxy-*N*-methoxy-*N*-methylbenzamide **12**

To a dry flask containing **11** (353 mg, 1.44 mmol), *N,O*-dimethylhydroxylamine hydrochloride (285 mg, 2.92 mmol) and HBTU (576 mg, 1.52 mmol) were added anhydrous DMF (3.5 mL) and diisopropylethylamine (1.0 g, 1.3 mL, 7.46 mmol) at 0 °C under a nitrogen atmosphere. The mixture was warmed to rt and stirred for 14 h, then concentrated *in vacuo*. The residues were redissolved in EtOAc (50 mL), washed with citric acid (10% w/v, 2 × 50 mL), saturated aqueous NaHCO<sub>3</sub> (2 × 50 mL), H<sub>2</sub>O (2 × 50 mL) and brine (50 mL), dried (MgSO<sub>4</sub>), filtered, and concentrated *in vacuo*.

Purification by silica gel column chromatography (gradient elution, gradient 6 → 40% EtOAc/petroleum ether) gave **12** as a colorless oil (331 mg, 80%); <sup>1</sup>H NMR (400 MHz, CDCl<sub>3</sub>) 1.41 (t, *J* = 7.0 Hz, 3H), 3.34 (s, 3H), 3.57 (s, 3H), 4.03 (q, *J* = 7.0 Hz, 2H), 7.10-7.14 (m, 2H), 7.35-7.38 (m, 1H); <sup>13</sup>C NMR (100 MHz, CDCl<sub>3</sub>) 14.6, 33.7, 61.2, 64.0, 113.2, 119.9, 122.3, 123.1, 136.6, 159.3, 168.1; HRMS *m/z* (ES<sup>+</sup>) found [M+Na]<sup>+</sup> 310.0055, 312.0034; C<sub>11</sub>H<sub>14</sub><sup>79</sup>BrNNaO<sub>3</sub> requires M<sup>+</sup> 310.0049, C<sub>11</sub>H<sub>14</sub><sup>81</sup>BrNNaO<sub>3</sub>

requires  $M^+$  312.0029;  $m/z$  ( $ES^+$ ) 288 ( $[^{79}M+H]^+$ , 25), 290 ( $[^{81}M+H]^+$ , 24), 310 ( $[^{79}M+Na]^+$ , 57), 312 ( $[^{81}M+Na]^+$ , 55), 597 ( $[2^{79}M+Na]^+$ , 96), 599 ( $[^{79}M+^{81}M+Na]^+$ , 100), 601 ( $[2^{81}M+Na]^+$ , 95). Anal. Calcd for  $C_{11}H_{14}BrNO_3$ : C, 45.9; H, 4.9; N, 4.9. Found: C, 46.0; H, 4.8; N, 4.7.

### 1-(3-Bromo-5-ethoxyphenyl)ethanone 13

To a solution of **12** (250 mg, 868  $\mu$ mol) in anhydrous THF (8 mL) under an argon atmosphere was added MeMgBr solution (1.0 M in dibutyl ether, 2.6 mL, 2.6 mmol) dropwise at 0 °C. The solution was warmed to rt and stirred for 15 h, then quenched with aqueous HCl (1 M, 15 mL). The mixture was extracted with EtOAc (3  $\times$  15 mL), and the combined organic layers were washed with brine (50 mL), dried ( $MgSO_4$ ), filtered, and concentrated *in vacuo*. Purification by silica gel column chromatography (gradient elution, gradient 3  $\rightarrow$  30%  $Et_2O$ /petroleum ether) gave **13** as a colorless solid (181 mg, 86%); mp 40-41 °C (15%  $Et_2O$ :petroleum ether);  $^1H$  NMR (400 MHz,  $CDCl_3$ ) 1.43 (t,  $J$  = 7.0 Hz, 3H), 2.57 (s, 3H), 4.07 (q,  $J$  = 7.0 Hz, 2H), 7.23-7.25 (m, 1H), 7.38-7.41 (m, 1H), 7.63-7.65 (m, 1H);  $^{13}C$  NMR (100 MHz,  $CDCl_3$ ) 14.6, 26.7, 64.2, 112.7, 122.5, 123.0, 123.8, 139.4, 159.8, 196.5; HRMS  $m/z$  ( $ES^+$ ) found  $[M+Na]^+$  264.9833, 266.9814;  $C_{10}H_{11}^{79}BrNaO_2$  requires  $M^+$  264.9835,  $C_{10}H_{11}^{81}BrNaO_2$  requires  $M^+$  266.9814;  $m/z$  ( $ES^+$ ) 265 ( $[^{79}M+Na]^+$ , 100), 267 ( $[^{81}M+Na]^+$ , 97). Anal. Calcd for  $C_{10}H_{11}BrO_2$ : C, 49.4; H, 4.6. Found: C, 49.6; H, 4.4.

### **Further characterization for compounds 3a-d, 4a-d**

#### 3,5-Dimethyl-4-phenylisoxazole 3a

Anal. Calcd for  $C_{11}H_{11}NO$ : C, 76.3; H, 6.4; N, 8.1. Found: C, 76.4; H, 6.5; N, 8.0.

#### 1-3-(3,5-Dimethylisoxazol-4-yl)phenyl)ethanone 3b

Anal. Calcd for C<sub>13</sub>H<sub>13</sub>NO<sub>2</sub>: C, 72.5; H, 6.1; N, 6.5. Found: C, 72.6; H, 6.2; N, 6.4.

4-(3-Ethoxyphenyl)-3,5-dimethylisoxazole **3c**

<sup>13</sup>C NMR (100 MHz, CDCl<sub>3</sub>) 10.8, 11.6, 14.8, 63.5, 113.2, 115.6, 116.6, 121.3, 129.8, 131.7, 158.6, 159.2, 165.2. Anal. Calcd for C<sub>13</sub>H<sub>15</sub>NO<sub>2</sub>: C, 71.9; H, 7.0; N, 6.5. Found: C, 72.0; H, 7.1; N, 6.4.

(*RS*)-1-(3-(3,5-Dimethylisoxazol-4-yl)phenyl)ethanol **3d**

<sup>13</sup>C NMR (100 MHz, CDCl<sub>3</sub>) 10.8, 11.6, 25.4, 70.1, 116.6, 124.6, 126.1, 128.0, 128.9, 130.6, 146.6, 158.7, 165.2. Anal. Calcd for C<sub>13</sub>H<sub>15</sub>NO<sub>2</sub>: C, 71.9; H, 7.0; N, 6.5. Found: C, 72.0; H, 7.0; N, 6.3.

Ethyl 3-(3,5-dimethylisoxazol-4-yl)-5-ethoxybenzoate **4a**

<sup>13</sup>C NMR (100 MHz, CDCl<sub>3</sub>) 10.8, 11.6, 14.3, 14.7, 61.3, 63.9, 113.5, 115.9, 120.5, 122.5, 131.9, 132.3, 158.5, 159.2, 165.6, 166.1. Anal. Calcd for C<sub>16</sub>H<sub>19</sub>NO<sub>4</sub>: C, 66.4; H, 6.6; N, 4.8. Found: C, 66.6; H, 6.5; N, 4.7.

3-(3,5-Dimethylisoxazol-4-yl)-5-ethoxybenzoic acid **4b**

<sup>13</sup>C NMR (126 MHz, CDCl<sub>3</sub>) 10.8, 11.6, 14.7, 64.0, 113.8, 115.7, 121.6, 123.1, 131.0, 132.1, 158.5, 159.3, 165.7, 171.1. Anal. Calcd for C<sub>14</sub>H<sub>15</sub>NO<sub>4</sub>: C, 64.4; H, 5.8; N, 5.4. Found: C, 64.2; H, 5.9; N, 5.3.

1-(3-(3,5-Dimethylisoxazol-4-yl)-5-ethoxyphenyl)ethanone **4c**

<sup>13</sup>C NMR (126 MHz, CDCl<sub>3</sub>) 10.8, 11.6, 14.7, 26.7, 63.9, 112.3, 115.9, 120.5, 121.5, 132.2, 138.9, 158.5, 159.5, 165.6, 197.5. Anal. Calcd for C<sub>15</sub>H<sub>17</sub>NO<sub>3</sub>: C, 69.5; H, 6.6; N, 5.4. Found: C, 69.6; H, 6.7; N, 5.3.

(RS)-1-(3-(3,5-Dimethylisoxazol-4-yl)-5-ethoxyphenyl)ethanol **4d**

<sup>13</sup>C NMR (100 MHz, CDCl<sub>3</sub>) 10.8, 11.6, 14.8, 25.4, 63.6, 70.1, 110.3, 114.4, 116.6, 118.3, 131.8, 148.1, 158.6, 159.4, 165.2. Anal. Calcd for C<sub>15</sub>H<sub>19</sub>NO<sub>3</sub>: C, 68.9; H, 7.3; N, 5.3. Found: C, 69.1; H, 7.1; N, 5.5.

**References**

1. Fall, Y.; Reynaud, C.; Doucet, H.; Santelli, M., Ligand-Free-Palladium-Catalyzed Direct 4-Arylation of Isoxazoles Using Aryl Bromides. *Eur. J. Org. Chem.* **2009**, *2009*, 4041-4050.
2. Sarju, J.; Danks, T. N.; Wagner, G., Rapid microwave-assisted synthesis of phenyl ethers under mildly basic and nonaqueous conditions. *Tetrahedron Lett.* **2004**, *45*, 7675-7677.
3. Leslie, A. G. W.; Powell, H. *MOSFLM*, 7.01; MRC Laboratory of Molecular Biology: Cambridge, 2007.
4. Evans, P. *SCALA - scale together multiple observations of reflections*, 3.3.0; MRC Laboratory of Molecular Biology: Cambridge, 2007.
5. McCoy, A. J.; Grosse-Kunstleve, R. W.; Storoni, L. C.; Read, R. J., Likelihood-enhanced fast translation functions. *Acta Crystallogr. Sect. D. Biol. Crystallogr.* **2005**, *61*, 458-464.
6. Perrakis, A.; Morris, R.; Lamzin, V. S., Automated protein model building combined with iterative structure refinement. *Nat. Struct. Biol.* **1999**, *6*, 458-463.

7. Emsley, P.; Cowtan, K., Coot: model-building tools for molecular graphics. *Acta Crystallogr. Sect. D. Biol. Crystallogr.* **2004**, *60*, 2126-2132.
8. Murshudov, G. N.; Vagin, A. A.; Dodson, E. J., Refinement of macromolecular structures by the maximum-likelihood method. *Acta Crystallogr. Sect. D. Biol. Crystallogr.* **1997**, *53*, 240-255.
9. Painter, J.; Merritt, E. A., Optimal description of a protein structure in terms of multiple groups undergoing TLS motion. *Acta Crystallogr. Sect. D. Biol. Crystallogr.* **2006**, *62*, 439-450.
10. Molander, G. A.; Canturk, B.; Kennedy, L. E., Scope of the Suzuki-Miyaura Cross-Coupling Reactions of Potassium Heteroaryltrifluoroborates. *J. Org. Chem.* **2008**, *74*, 973-980.



# 6-bromo-3-methyl-3,4-dihydroquinazolin-2(1H)-one

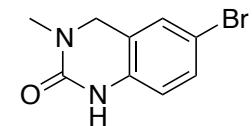

Current Data Parameters  
NAME bromodihydroquinazolinone  
EXPNO 1  
PROCNO 1

F2 - Acquisition Parameters  
Date\_ 20110721  
Time 22.04  
INSTRUM avc500  
PROBHD 5 mm CPDUL 13C  
PULPROG zg30  
TD 65536  
SOLVENT DMSO  
NS 16  
DS 2  
SWH 10330.578 Hz  
FIDRES 0.157632 Hz  
AQ 3.1719923 sec  
RG 4  
DW 48.400 usec  
DE 6.00 usec  
TE 298.0 K  
D1 1.0000000 sec  
TDO 1

==== CHANNEL f1 =====  
NUC1 1H  
P1 9.60 usec  
PL1 -6.00 dB  
PL1W 15.1999981 W  
SFO1 500.3030896 MHz

F2 - Processing parameters  
SI 32768  
SF 500.3000000 MHz  
WDW EM  
SSB 0  
LB 0.30 Hz  
GB 0  
PC 1.00

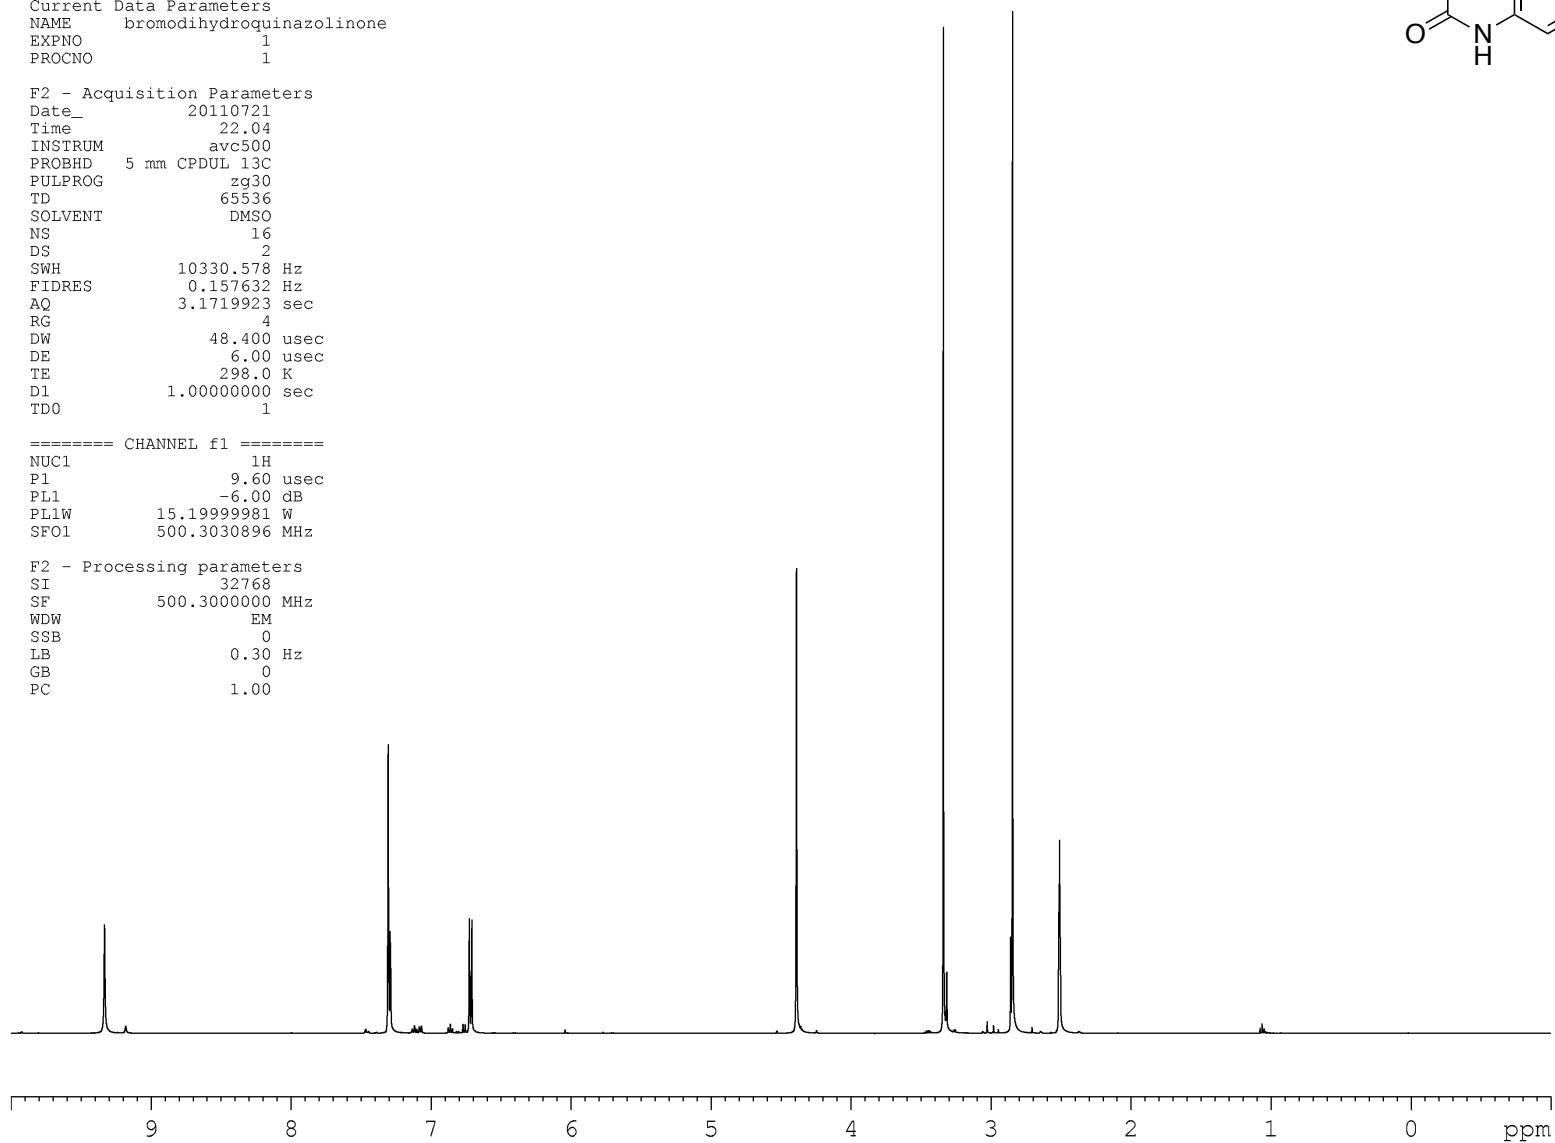

# 6-bromo-3-methyl-3,4-dihydroquinazolin-2(1H)-one

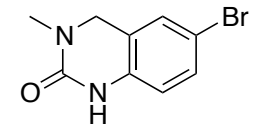

Current Data Parameters  
NAME bromodihydroquinazolinone  
EXPNO 2  
PROCNO 1

## F2 - Acquisition Parameters

Date\_ 20110721  
Time 22.31  
INSTRUM avc500  
PROBHD 5 mm CPDUL 13C  
PULPROG zgpg30  
TD 65536  
SOLVENT DMSO  
NS 512  
DS 2  
SWH 31250.000 Hz  
FIDRES 0.476837 Hz  
AQ 1.0486259 sec  
RG 1820  
DW 16.000 usec  
DE 20.00 usec  
TE 298.0 K  
D1 2.00000000 sec  
D11 0.03000000 sec  
TDO 1

## ==== CHANNEL f1 =====

NUC1 13C  
P1 9.10 usec  
PL1 -4.40 dB  
PL1W 28.15752029 W  
SFO1 125.8131151 MHz

## ==== CHANNEL f2 =====

CPDPRG2 waltz16  
NUC2 1H  
PCPD2 80.00 usec  
PL2 -6.00 dB  
PL12 12.42 dB  
PL13 18.42 dB  
PL2W 15.19999981 W  
PL12W 0.21869738 W  
PL13W 0.05493430 W  
SFO2 500.3020012 MHz

## F2 - Processing parameters

SI 32768  
SF 125.8005954 MHz  
WDW EM  
SSB 0  
LB 1.00 Hz  
GB 0  
PC 1.40

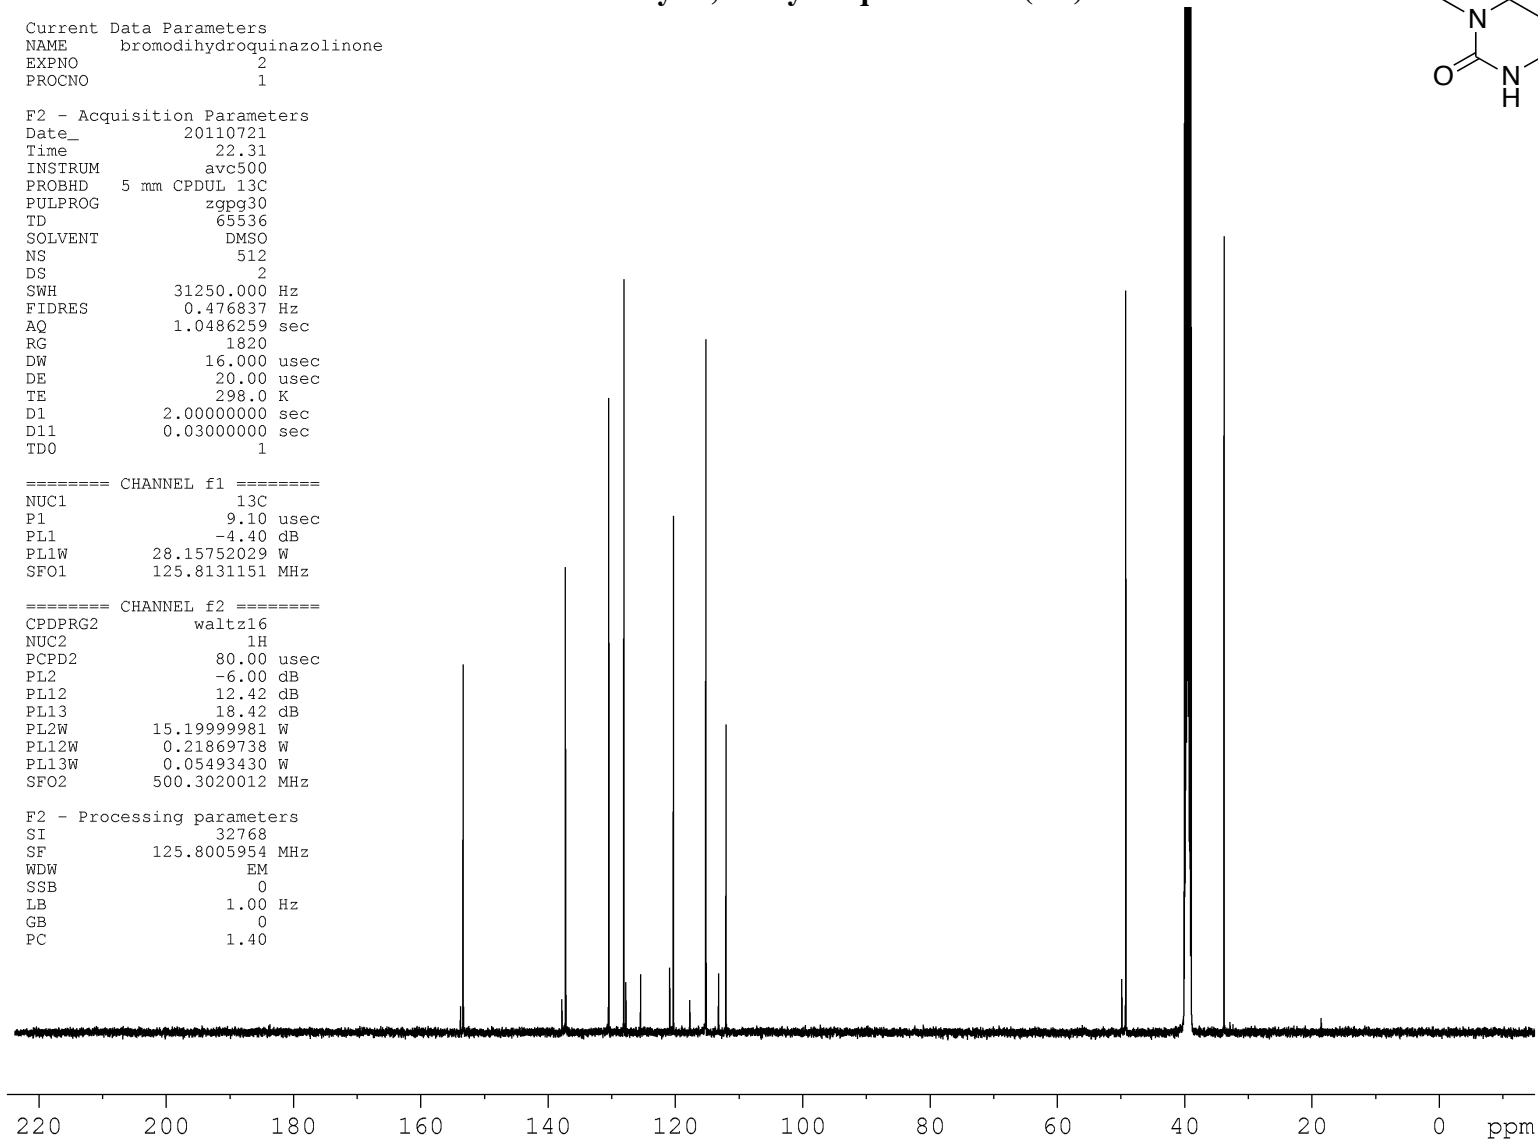

# 6-(3,5-dimethylisoxazol-4-yl)-3-methyl-3,4-dihydroquinazolin-2(1H)-one 1

Current Data Parameters  
NAME 121  
EXPNO 1  
PROCNO 1

F2 - Acquisition Parameters  
Date\_ 20110712  
Time 10.21  
INSTRUM avc500  
PROBHD 5 mm CPDUL 13C  
PULPROG zg30  
TD 65536  
SOLVENT CDC13  
NS 16  
DS 2  
SWH 10330.578 Hz  
FIDRES 0.157632 Hz  
AQ 3.1719923 sec  
RG 4  
DW 48.400 usec  
DE 6.00 usec  
TE 298.0 K  
D1 1.0000000 sec  
TDO 1

==== CHANNEL f1 =====  
NUC1 1H  
P1 9.60 usec  
PL1 -6.00 dB  
PL1W 15.19999981 W  
SFO1 500.3030896 MHz

F2 - Processing parameters  
SI 32768  
SF 500.3000240 MHz  
WDW EM  
SSB 0  
LB 0.30 Hz  
GB 0  
PC 1.00

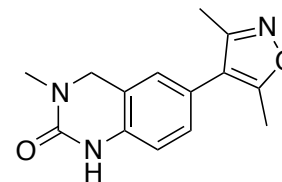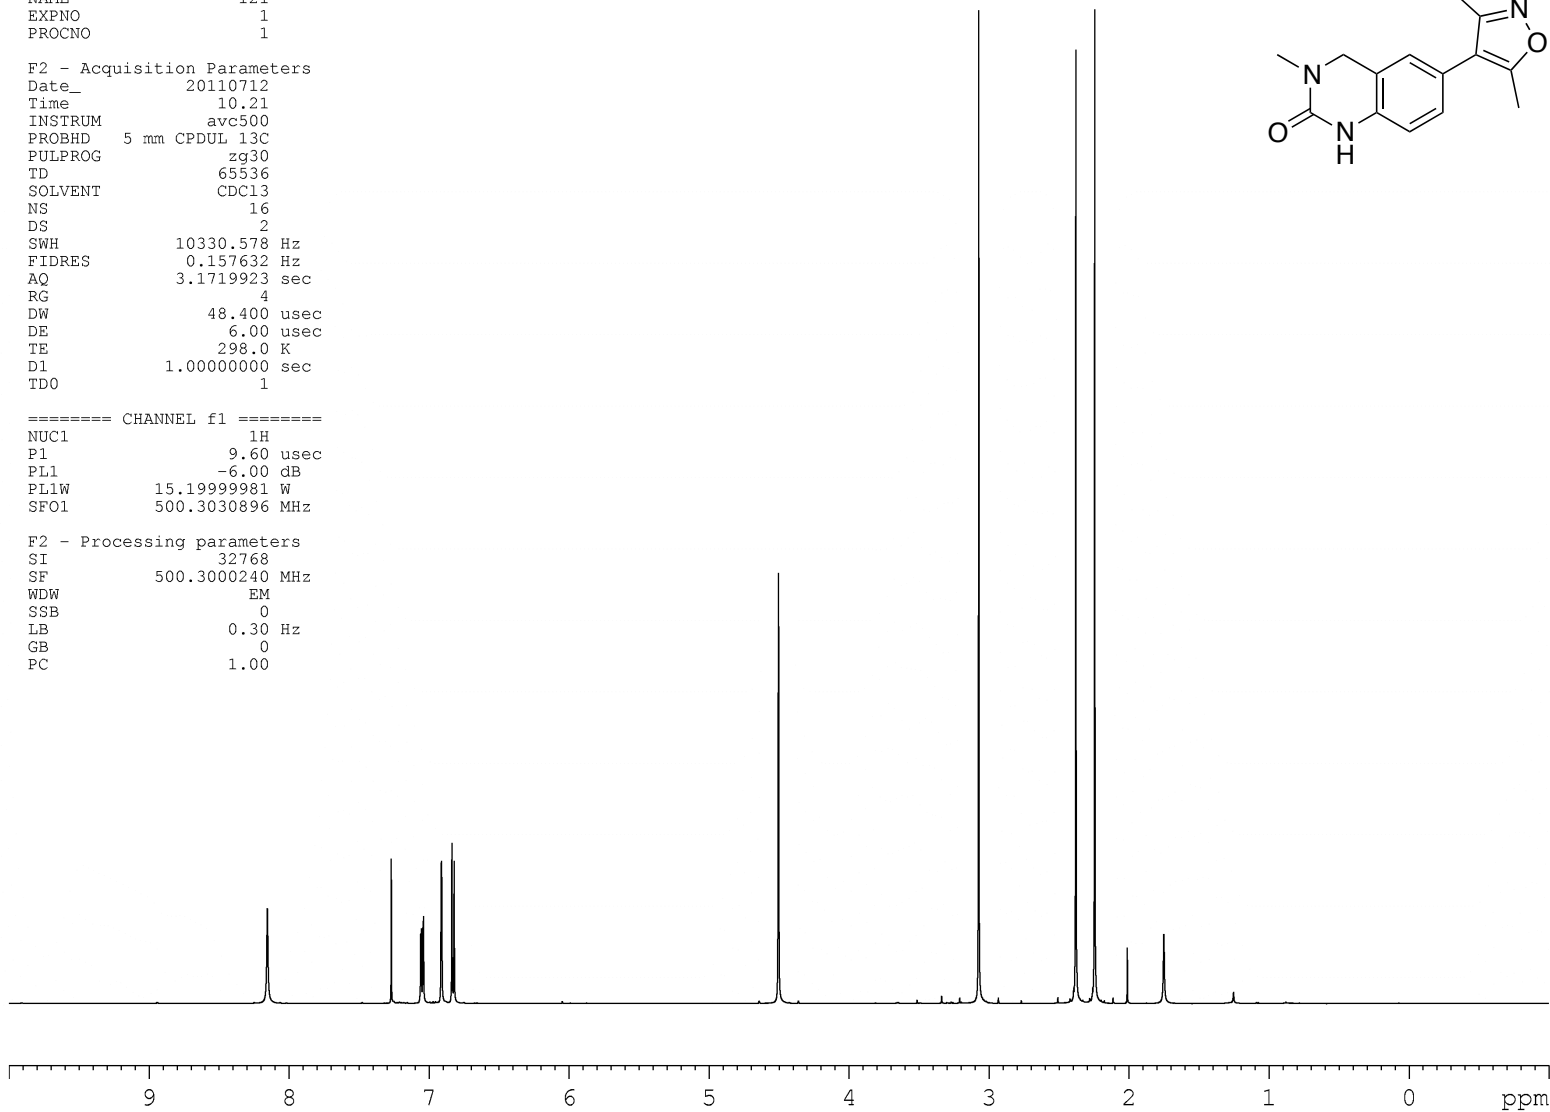

# 6-(3,5-dimethylisoxazol-4-yl)-3-methyl-3,4-dihydroquinazolin-2(1H)-one 1

Current Data Parameters  
NAME 121  
EXPNO 4  
PROCNO 1

F2 - Acquisition Parameters  
Date\_ 20110712  
Time 11.04  
INSTRUM avc500  
PROBHD 5 mm CPDUL 13C  
PULPROG zgpg30  
TD 65536  
SOLVENT CDC13  
NS 512  
DS 2  
SWH 31250.000 Hz  
FIDRES 0.476837 Hz  
AQ 1.0486259 sec  
RG 1820  
DW 16.000 usec  
DE 20.00 usec  
TE 298.0 K  
D1 2.00000000 sec  
D11 0.03000000 sec  
TD0 1

=====  
CHANNEL f1  
NUC1 13C  
P1 9.10 usec  
PL1 -4.40 dB  
PL1W 28.15752029 W  
SFO1 125.8131151 MHz

=====  
CHANNEL f2  
CPDPRG2 waltz16  
NUC2 1H  
PCPD2 80.00 usec  
PL2 -6.00 dB  
PL12 12.42 dB  
PL13 18.42 dB  
PL2W 15.19999981 W  
PL12W 0.21869738 W  
PL13W 0.05493430 W  
SFO2 500.3020012 MHz

F2 - Processing parameters  
SI 32768  
SF 125.8005438 MHz  
WDW EM  
SSB 0  
LB 1.00 Hz  
GB 0  
PC 1.40

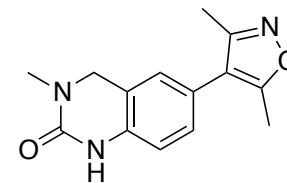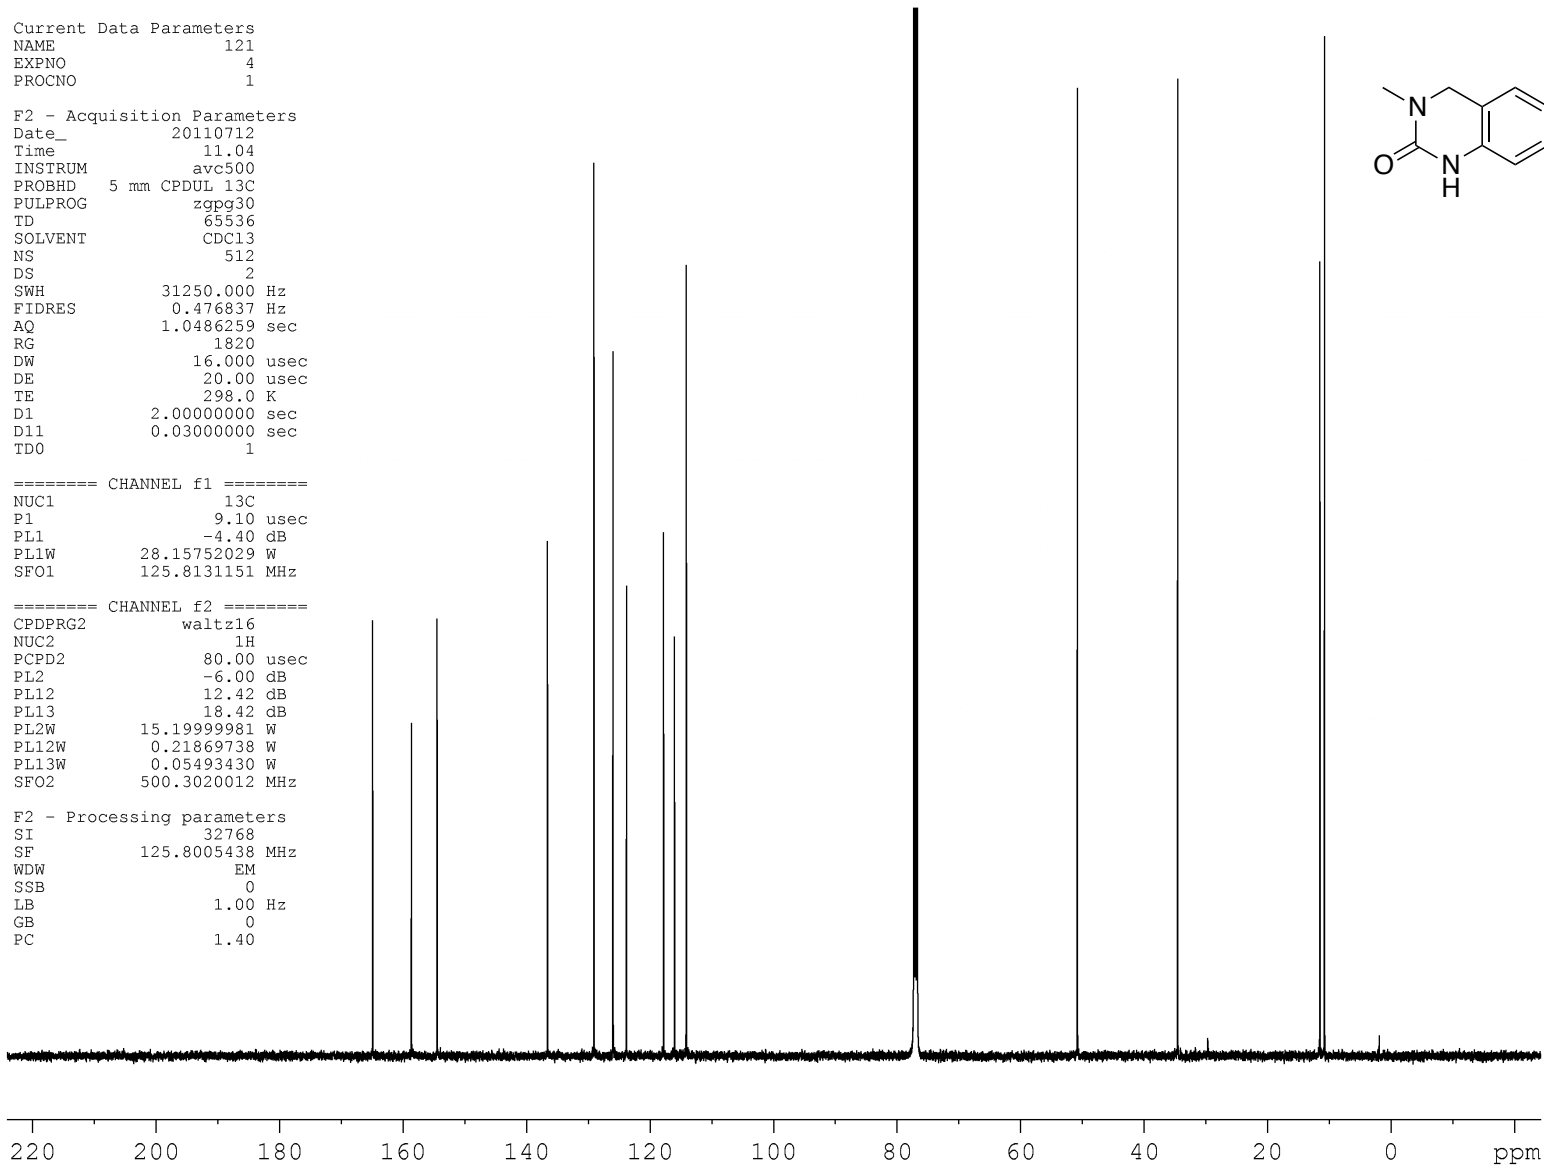

### 4-(3-Ethoxyphenyl)-3,5-dimethylisoxazole 3c

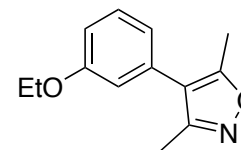

NAME 039  
EXPNO 1  
PROCNO 1  
Date\_ 20101206  
Time 22.09  
INSTRUM av400  
PROBHD 5 mm QNP 1H/13  
PULPROG zg60  
TD 65536  
SOLVENT CDC13  
NS 16  
DS 2  
SWH 8278.146 Hz  
FIDRES 0.126314 Hz  
AQ 3.9584243 sec  
RG 32  
DW 60.400 usec  
DE 7.50 usec  
TE 300.0 K  
D1 1.00000000 sec

===== CHANNEL f1 =====  
NUC1 1H  
P1 9.00 usec  
PL1 0.00 dB  
SFO1 400.2024714 MHz  
SI 32768  
SF 400.2000028 MHz  
WDW EM  
SSB 0  
LB 0.30 Hz  
GB 0  
PC 1.00

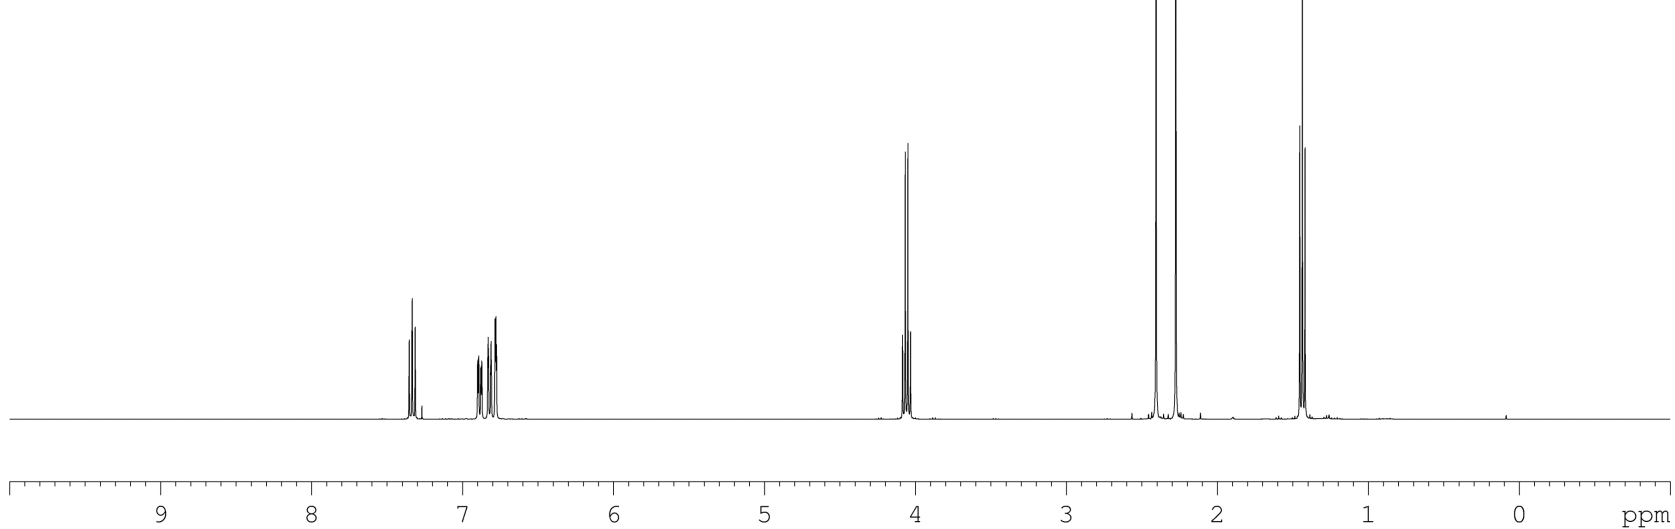

### 4-(3-Ethoxyphenyl)-3,5-dimethylisoxazole 3c

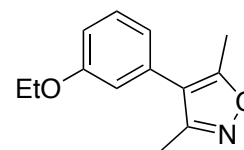

NAME 039  
EXPNO 2  
PROCNO 1  
Date\_ 20101206  
Time 22.17  
INSTRUM av400  
PROBHD 5 mm QNP 1H/13  
FULPROG zgpg30  
TD 32768  
SOLVENT CDCl3  
NS 256  
DS 4  
SWH 26178.010 Hz  
FIDRES 0.798889 Hz  
AQ 0.6259188 sec  
RG 32768  
DW 19.100 usec  
DE 7.50 usec  
TE 300.0 K  
D1 1.0000000 sec  
D11 0.0300000 sec  
TD0 1

===== CHANNEL f1 =====  
NUC1 13C  
P1 9.50 usec  
PL1 0.00 dB  
SFO1 100.6403931 MHz

===== CHANNEL f2 =====  
CPDPRG2 waltz16  
NUC2 1H  
PCPD2 80.00 usec  
PL2 0.00 dB  
PL12 19.00 dB  
PL13 25.00 dB  
SFO2 400.2016008 MHz  
SI 32768  
SF 100.6303718 MHz  
WDW EM  
SSB 0  
LB 1.00 Hz  
GB 0  
PC 1.40

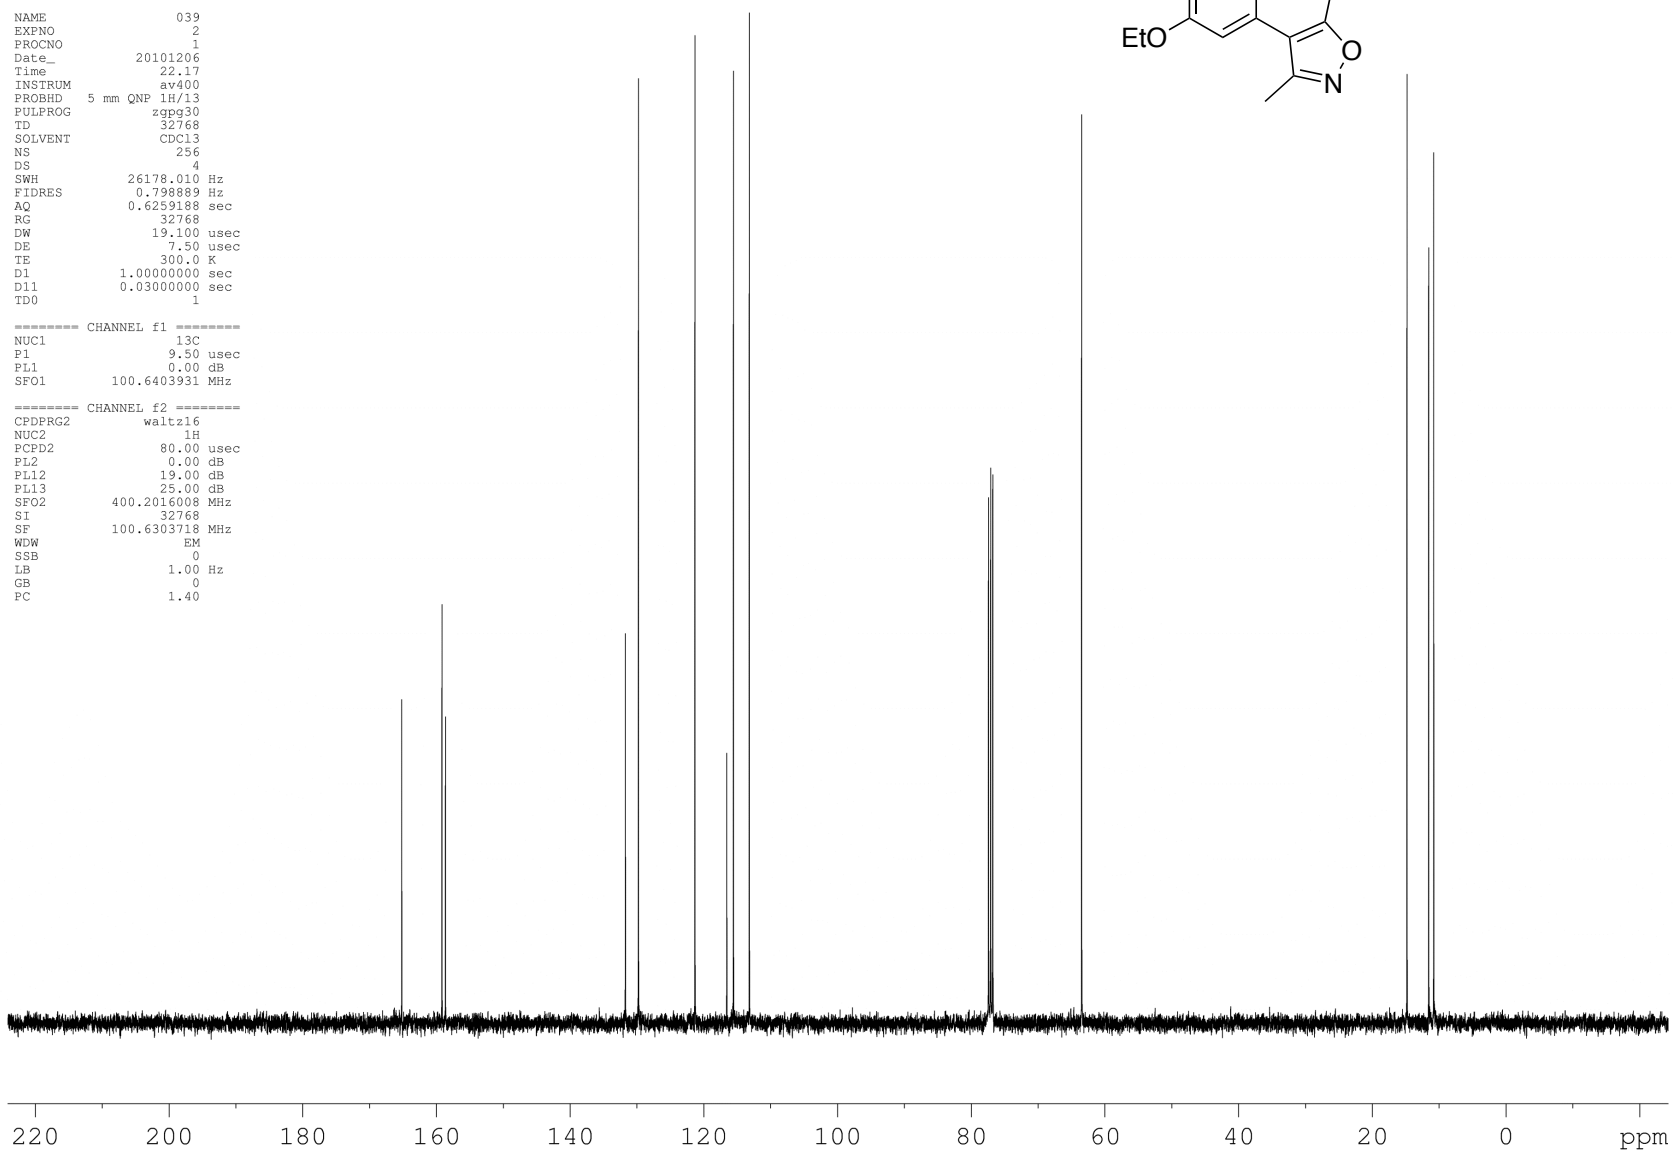

NAME 044  
EXPNO 1  
PROCNO 1  
Date\_ 20101215  
Time 15.10  
INSTRUM av400  
PROBHD 5 mm QNP 1H/13  
PULPROG zg60  
TD 65536  
SOLVENT CDC13  
NS 16  
DS 2  
SWH 8278.146 Hz  
FIDRES 0.126314 Hz  
AQ 3.9584243 sec  
RG 90.5  
DW 60.400 usec  
DE 7.50 usec  
TE 300.0 K  
D1 1.00000000 sec

**(RS)-1-(3-(3,5-Dimethylisoxazol-4-yl)phenyl)ethanol 3d**

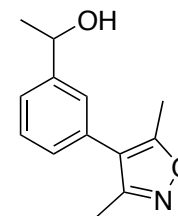

===== CHANNEL f1 =====  
NUC1 1H  
P1 9.00 usec  
PL1 0.00 dB  
SFO1 400.2024714 MHz  
SI 32768  
SF 400.2000028 MHz  
WDW EM  
SSB 0  
LB 0.30 Hz  
GB 0  
PC 1.00

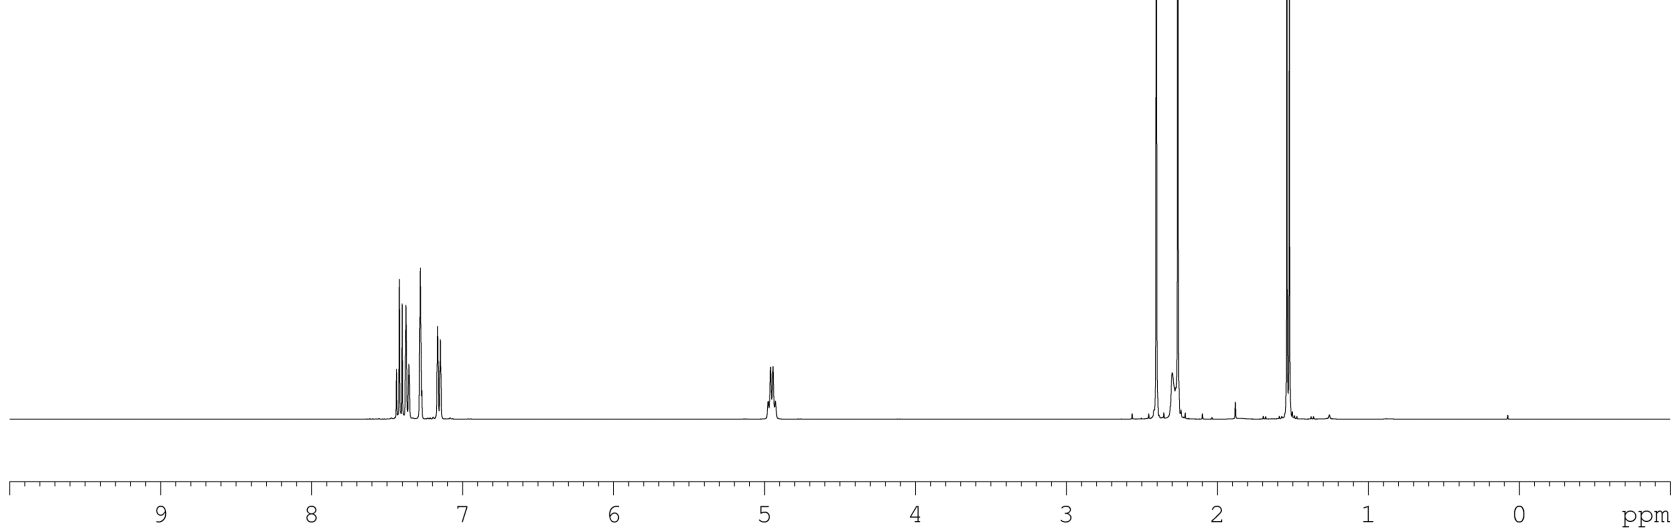

**(RS)-1-(3-(3,5-Dimethylisoxazol-4-yl)phenyl)ethanol 3d**

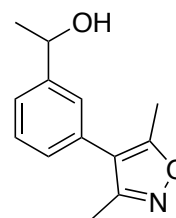

NAME 044  
EXPNO 2  
PROCNO 1  
Date\_ 20101215  
Time 15.18  
INSTRUM av400  
PROBHD 5 mm QNP 1H/13  
FULPROG zgpg30  
TD 32768  
SOLVENT CDCl3  
NS 256  
DS 4  
SWH 26178.010 Hz  
FIDRES 0.798889 Hz  
AQ 0.6259188 sec  
RG 32768  
DW 19.100 usec  
DE 7.50 usec  
TE 300.0 K  
D1 1.00000000 sec  
D11 0.03000000 sec  
TD0 1

===== CHANNEL f1 =====  
NUC1 13C  
P1 9.50 usec  
PL1 0.00 dB  
SFO1 100.6403931 MHz  
===== CHANNEL f2 =====  
CPDPRG2 waltz16  
NUC2 1H  
PCPD2 80.00 usec  
PL2 0.00 dB  
PL12 19.00 dB  
PL13 25.00 dB  
SFO2 400.2016008 MHz  
SI 32768  
SF 100.6303718 MHz  
WDW EM  
SSB 0  
LB 1.00 Hz  
GB 0  
PC 1.40

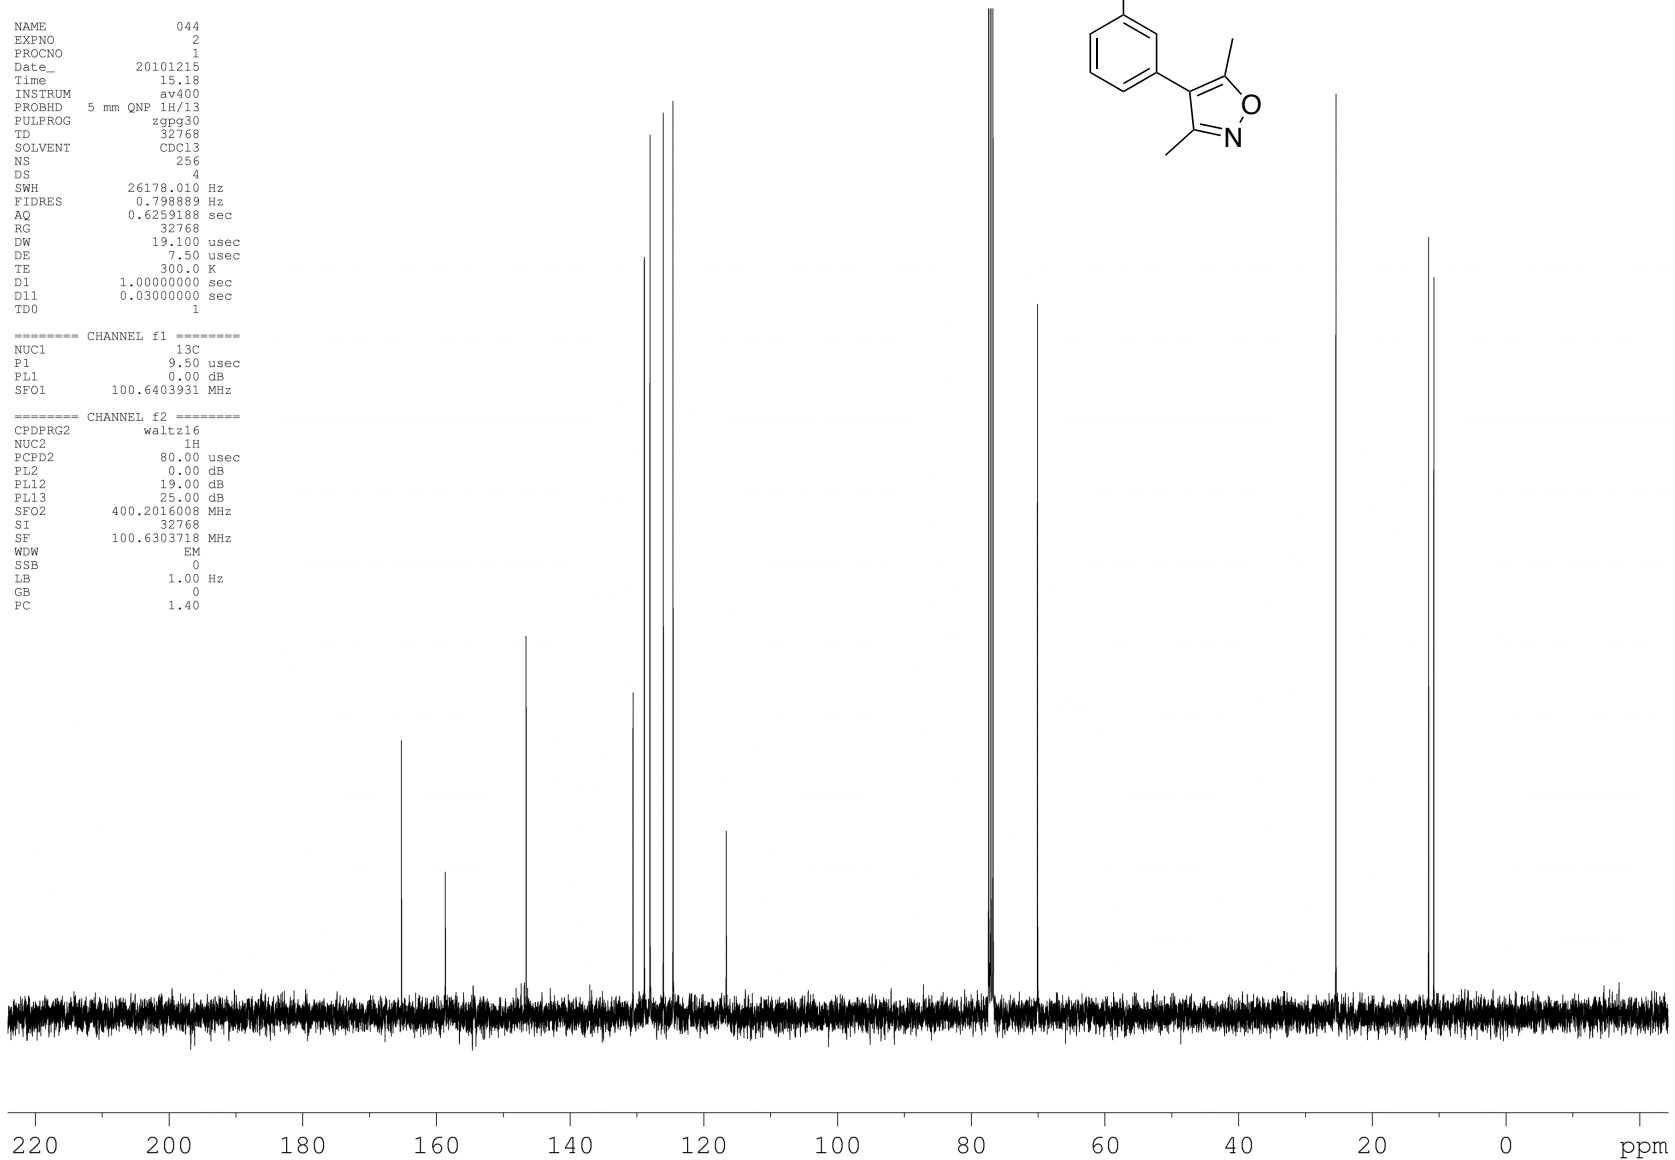



# Ethyl 3-(3,5-dimethylisoxazol-4-yl)-5-ethoxybenzoate 4a

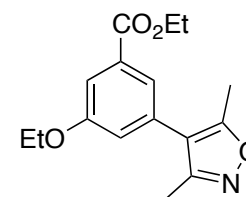

NAME 032  
EXPNO 1  
PROCNO 1  
Date\_ 20101126  
Time 10.40  
INSTRUM av400  
PROBHD 5 mm QNP 1H/13  
PULPROG zg60  
TD 65536  
SOLVENT CDC13  
NS 16  
DS 2  
SWH 8278.146 Hz  
FIDRES 0.126314 Hz  
AQ 3.9584243 sec  
RG 90.5  
DW 60.400 usec  
DE 7.50 usec  
TE 300.0 K  
D1 1.00000000 sec

=====  
CHANNEL f1  
NUC1 1H  
P1 9.00 usec  
PL1 0.00 dB  
SFO1 400.2024714 MHz  
SI 32768  
SF 400.2000028 MHz  
WDW EM  
SSB 0  
LB 0.30 Hz  
GB 0  
PC 1.00

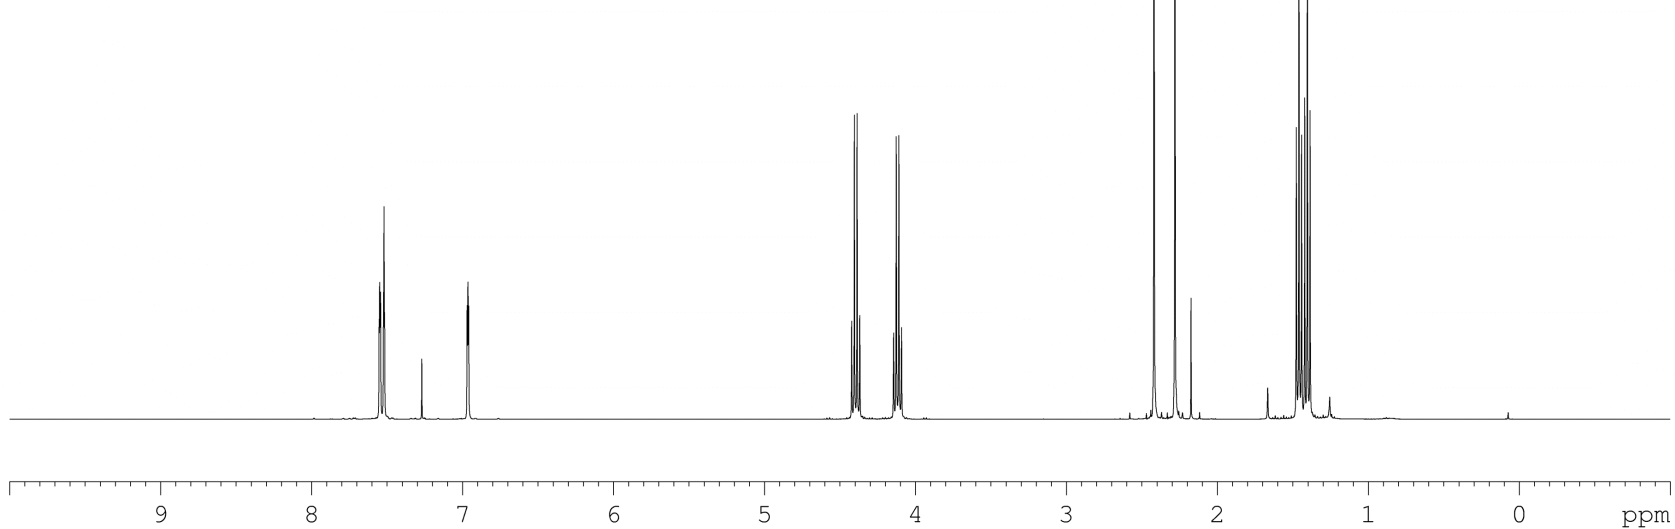

# Ethyl 3-(3,5-dimethylisoxazol-4-yl)-5-ethoxybenzoate 4a

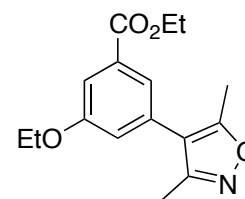

NAME 032  
EXPNO 2  
PROCNO 1  
Date\_ 20101126  
Time 10.48  
INSTRUM av400  
PROBHD 5 mm QNP 1H/13  
FULPROG zgpg30  
TD 32768  
SOLVENT CDCl3  
NS 256  
DS 4  
SWH 26178.010 Hz  
FIDRES 0.798889 Hz  
AQ 0.6259188 sec  
RG 32768  
DW 19.100 usec  
DE 7.50 usec  
TE 300.0 K  
D1 1.0000000 sec  
D11 0.0300000 sec  
TD0 1

==== CHANNEL f1 =====  
NUC1 13C  
P1 9.50 usec  
PL1 0.00 dB  
SFO1 100.6403931 MHz

==== CHANNEL f2 =====  
CPDPRG2 waltz16  
NUC2 1H  
PCPD2 80.00 usec  
PL2 0.00 dB  
PL12 19.00 dB  
PL13 25.00 dB  
SFO2 400.2016008 MHz  
SI 32768  
SF 100.6303718 MHz  
WDW EM  
SSB 0  
LB 1.00 Hz  
GB 0  
PC 1.40

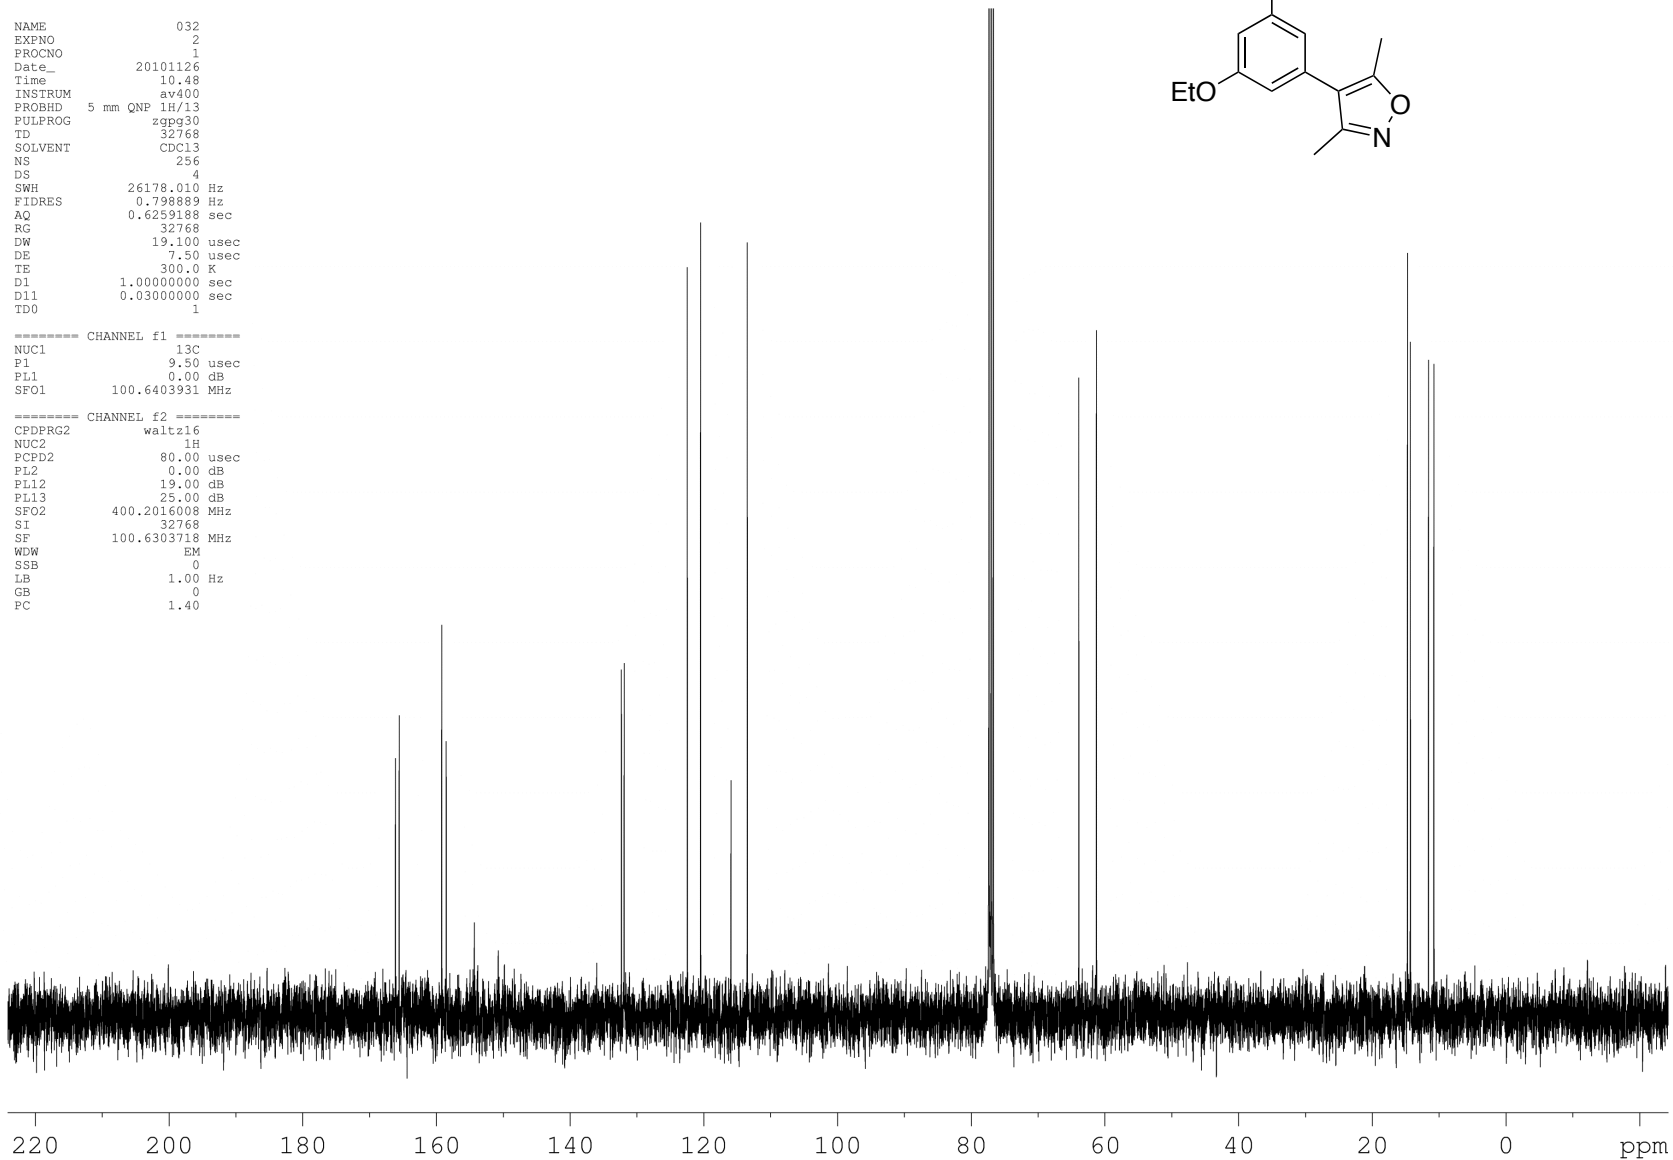

### 3-(3,5-Dimethylisoxazol-4-yl)-5-ethoxybenzoic acid 4b

Current Data Parameters  
NAME 103 recryst  
EXPNO 1  
PROCNO 1

F2 - Acquisition Parameters  
Date\_ 20110725  
Time\_ 10.20  
INSTRUM avc500  
PROBHD 5 mm CPDUL 13C  
PULPROG zg30  
TD 65536  
SOLVENT CDCl3  
NS 16  
DS 2  
SWH 10330.578 Hz  
FIDRES 0.157632 Hz  
AQ 3.1719923 sec  
RG 4  
DW 48.400 usec  
DE 6.00 usec  
TE 298.0 K  
D1 1.00000000 sec  
TDO 1

===== CHANNEL f1 =====  
NUC1 1H  
P1 9.60 usec  
PL1 -6.00 dB  
PL1W 15.19999981 W  
SFO1 500.3030896 MHz

F2 - Processing parameters  
SI 32768  
SF 500.3000240 MHz  
WDW EM  
SSB 0  
LB 0.30 Hz  
GB 0  
PC 1.00

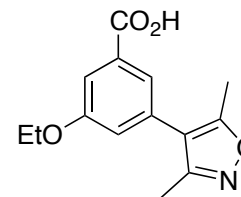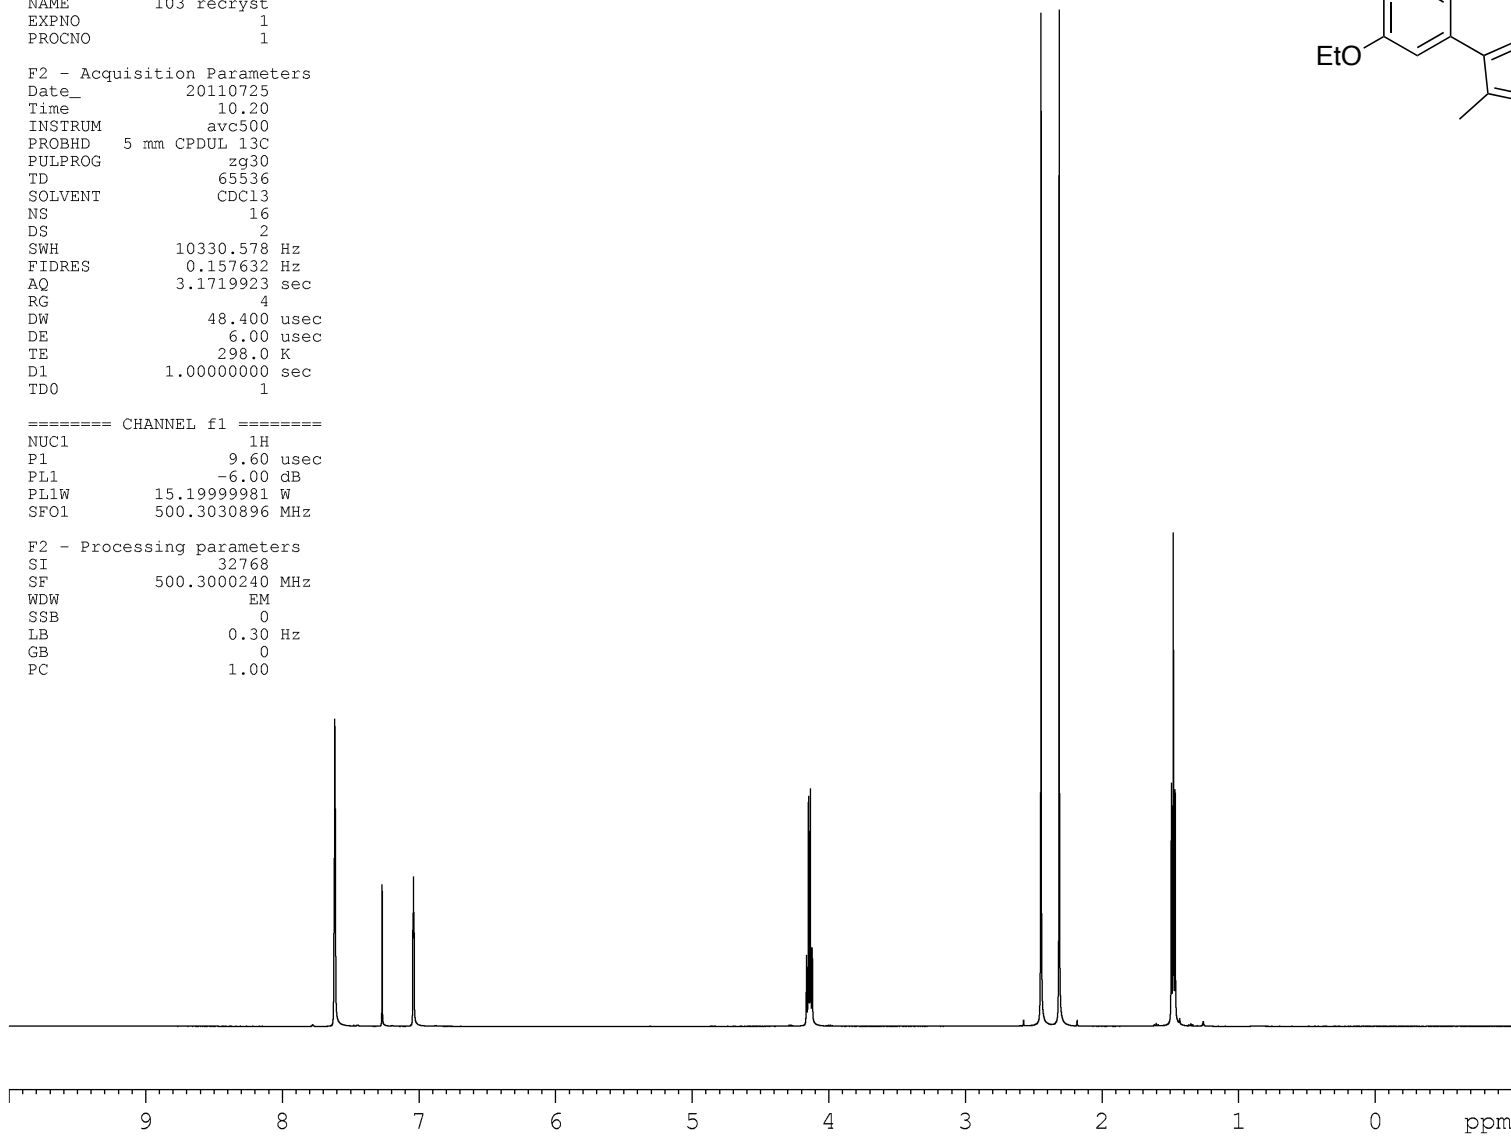

### 3-(3,5-Dimethylisoxazol-4-yl)-5-ethoxybenzoic acid 4b

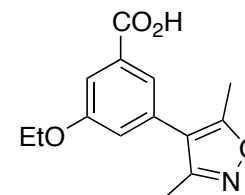

Current Data Parameters  
NAME 103 recryst  
EXPNO 2  
PROCNO 1

F2 - Acquisition Parameters  
Date\_ 20110725  
Time 10.47  
INSTRUM avc500  
PROBHD 5 mm CPDUL 13C  
PULPROG zgpg30  
TD 65536  
SOLVENT CDCl3  
NS 512  
DS 2  
SWH 31250.000 Hz  
FIDRES 0.476837 Hz  
AQ 1.0486259 sec  
RG 645  
DW 16.000 usec  
DE 20.00 usec  
TE 298.0 K  
D1 2.00000000 sec  
D11 0.03000000 sec  
TD0 1

==== CHANNEL f1 =====  
NUC1 13C  
P1 9.10 usec  
PL1 -4.40 dB  
PL1W 28.15752029 W  
SFO1 125.8131151 MHz

==== CHANNEL f2 =====  
CPDPRG2 waltz16  
NUC2 1H  
PCPD2 80.00 usec  
PL2 -6.00 dB  
PL12 12.42 dB  
PL13 18.42 dB  
PL2W 15.19999981 W  
PL12W 0.21869738 W  
PL13W 0.05493430 W  
SFO2 500.3020012 MHz

F2 - Processing parameters  
SI 32768  
SF 125.8005438 MHz  
WDW EM  
SSB 0  
LB 1.00 Hz  
GB 0  
PC 1.40

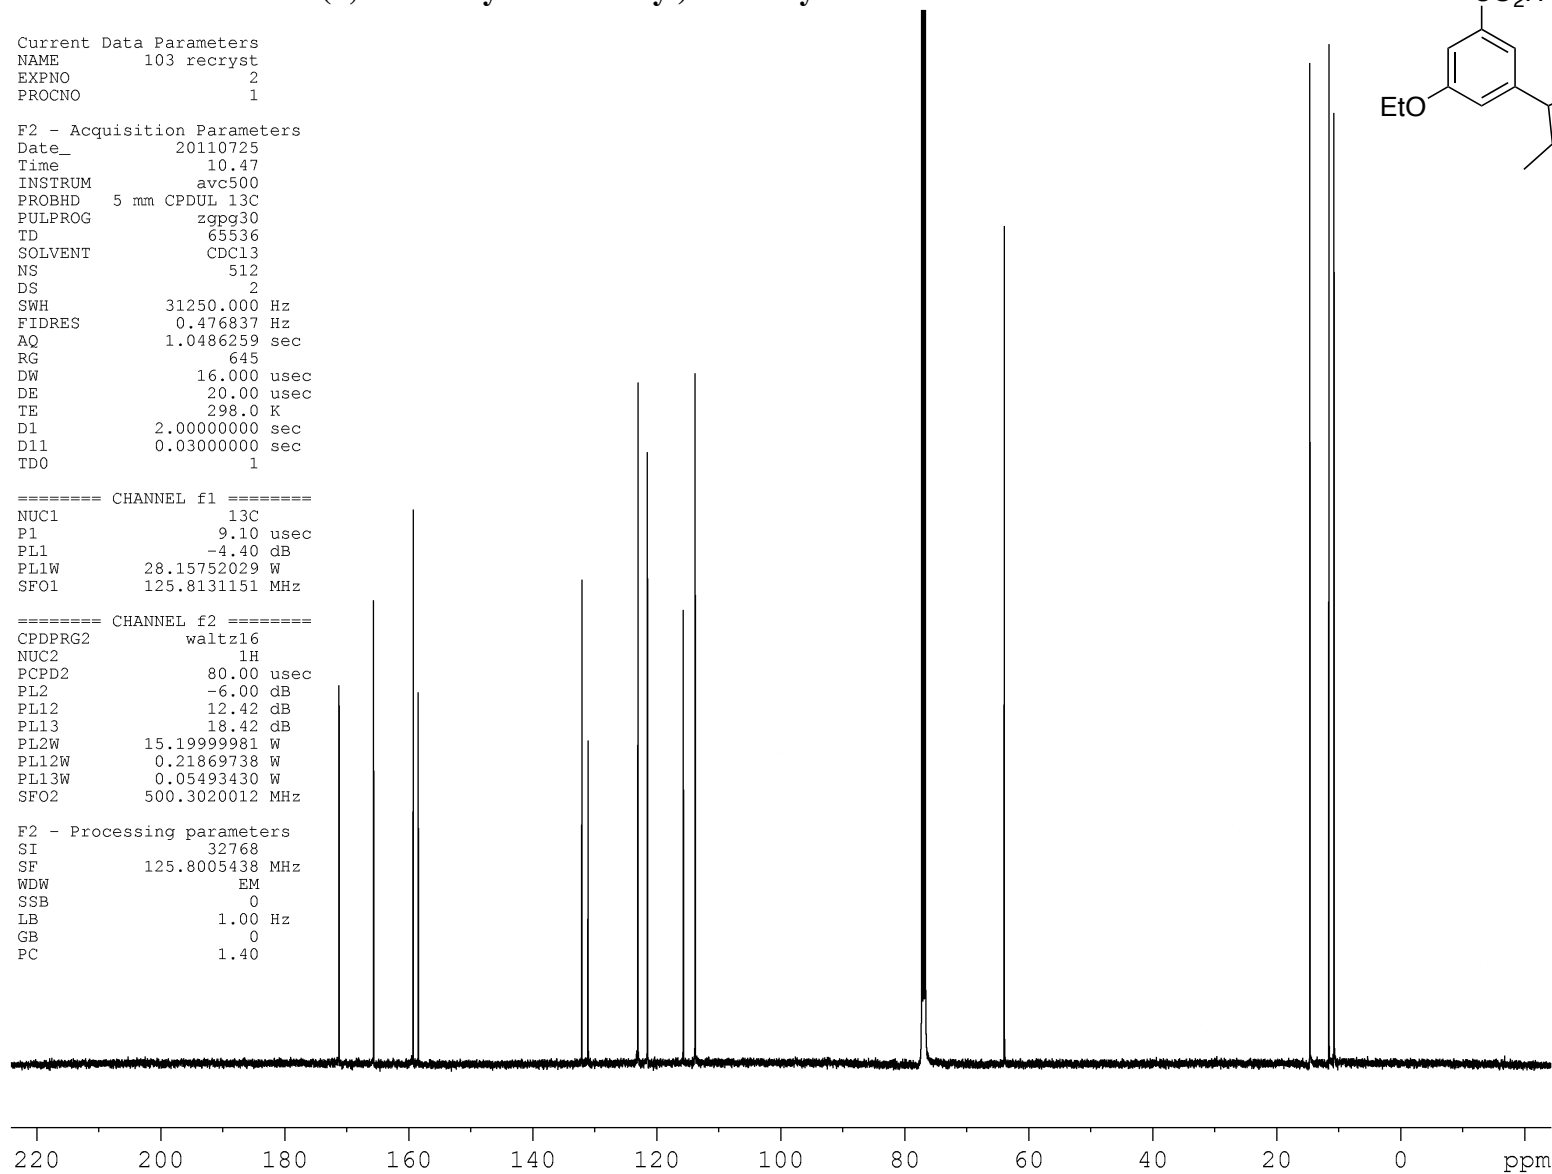

**1-(3-(3,5-Dimethylisoxazol-4-yl)-5-ethoxyphenyl)ethanone 4c**

NAME 042  
EXPNO 1  
PROCNO 1  
Date\_ 20101217  
Time 12.12  
INSTRUM avc500  
PROBHD 5 mm CPDUL 13C  
PULPROG zg30  
TD 65536  
SOLVENT CDC13  
NS 16  
DS 2  
SWH 10330.578 Hz  
FIDRES 0.157632 Hz  
AQ 3.1719923 sec  
RG 4  
DW 48.400 usec  
DE 6.00 usec  
TE 298.0 K  
D1 1.00000000 sec  
TD0 1

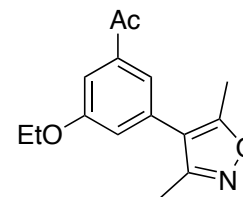

===== CHANNEL f1 =====  
NUC1 1H  
P1 9.60 usec  
PL1 -6.00 dB  
PL1W 15.19999981 W  
SFO1 500.3030896 MHz  
SI 32768  
SF 500.3000240 MHz  
WDW EM  
SSB 0  
LB 0.30 Hz  
GB 0  
PC 1.00

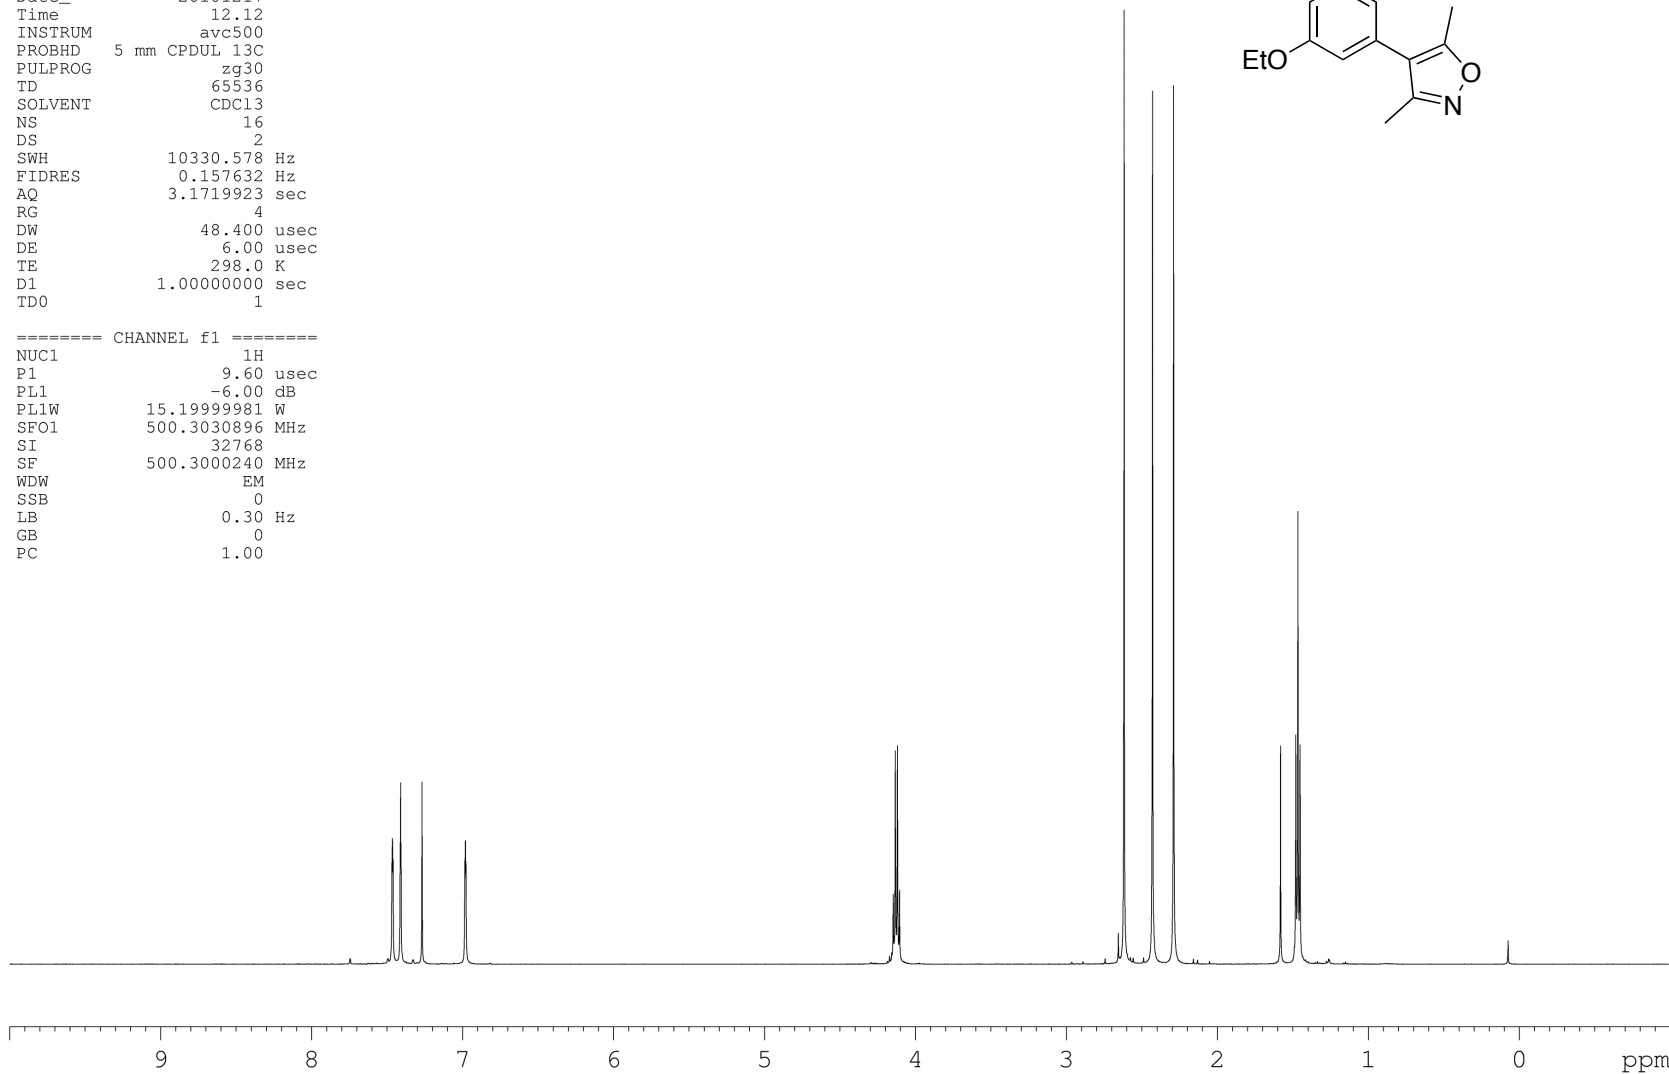

# 1-(3-(3,5-Dimethylisoxazol-4-yl)-5-ethoxyphenyl)ethanone 4c

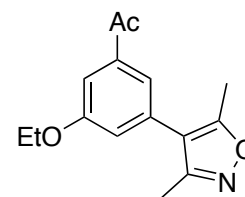

NAME 042  
EXPNO 4  
PROCNO 1  
Date\_ 20101217  
Time 12.42  
INSTRUM avc500  
PROBHD 5 mm CPDUL 13C  
FULPROG zgpg30  
TD 65536  
SOLVENT CDCl3  
NS 256  
DS 2  
SWH 31250.000 Hz  
FIDRES 0.476837 Hz  
AQ 1.0486259 sec  
RG 1820  
DW 16.000 usec  
DE 20.00 usec  
TE 298.0 K  
D1 2.0000000 sec  
D11 0.0300000 sec  
TD0 1

===== CHANNEL f1 =====  
NUC1 13C  
P1 9.50 usec  
PL1 -4.40 dB  
PL1W 28.15752029 W  
SFO1 125.8131151 MHz

===== CHANNEL f2 =====  
CPDPRG2 waltz16  
NUC2 1H  
PCPD2 80.00 usec  
PL2 -6.00 dB  
PL12 12.42 dB  
PL13 18.42 dB  
PL2W 15.19999981 W  
PL12W 0.21869738 W  
PL13W 0.05493430 W  
SFO2 500.3020012 MHz  
SI 32768  
SF 125.8005438 MHz  
WDW EM  
SSB 0  
LB 1.00 Hz  
GB 0  
PC 1.40

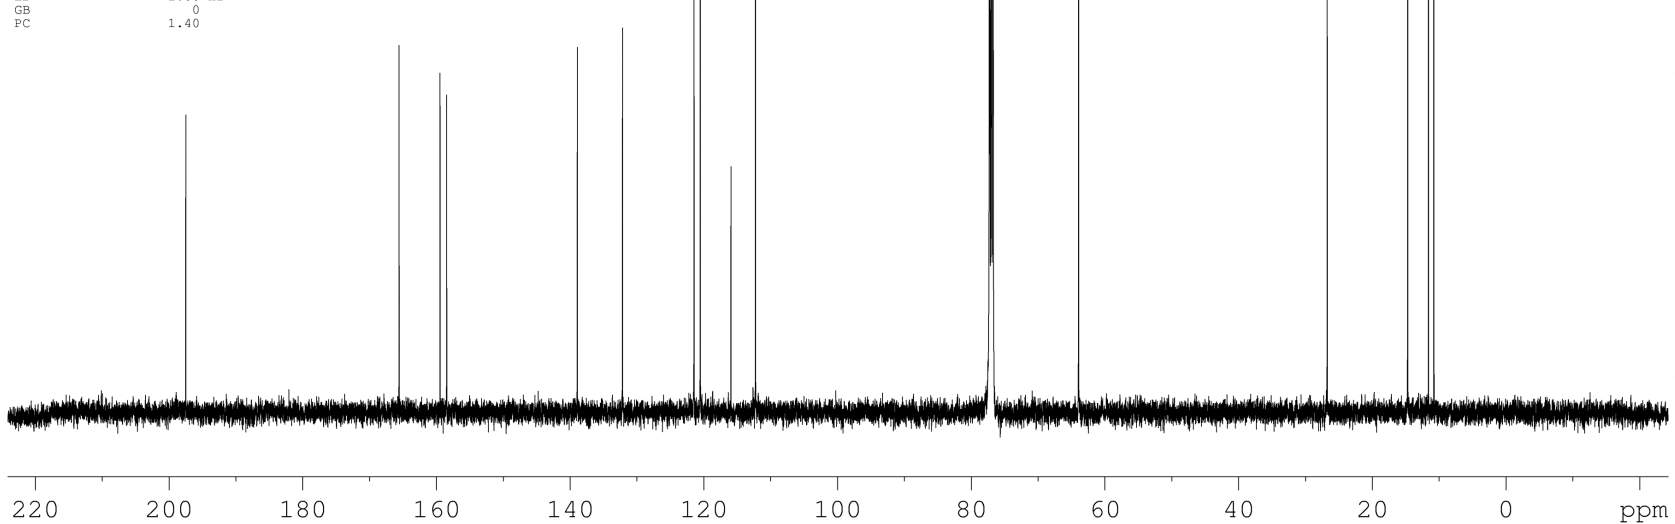



**(RS)-1-(3-(3,5-Dimethylisoxazol-4-yl)-5-ethoxyphenyl)ethanol 4d**

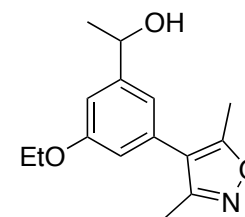

NAME 046  
EXPNO 2  
PROCNO 1  
Date\_ 20101217  
Time 12.35  
INSTRUM av400  
PROBHD 5 mm QNP 1H/13  
PULPROG zgpg30  
TD 32768  
SOLVENT CDCl3  
NS 256  
DS 4  
SWH 26178.010 Hz  
FIDRES 0.798889 Hz  
AQ 0.6259188 sec  
RG 32768  
DW 19.100 usec  
DE 7.50 usec  
TE 300.0 K  
D1 1.0000000 sec  
D11 0.0300000 sec  
TD0 1

==== CHANNEL f1 =====  
NUC1 13C  
P1 9.50 usec  
PL1 0.00 dB  
SFO1 100.6403931 MHz

==== CHANNEL f2 =====  
CPDPRG2 waltz16  
NUC2 1H  
PCPD2 80.00 usec  
PL2 0.00 dB  
PL12 19.00 dB  
PL13 25.00 dB  
SFO2 400.2016008 MHz  
SI 32768  
SF 100.6303718 MHz  
WDW EM  
SSB 0  
LB 1.00 Hz  
GB 0  
FC 1.40

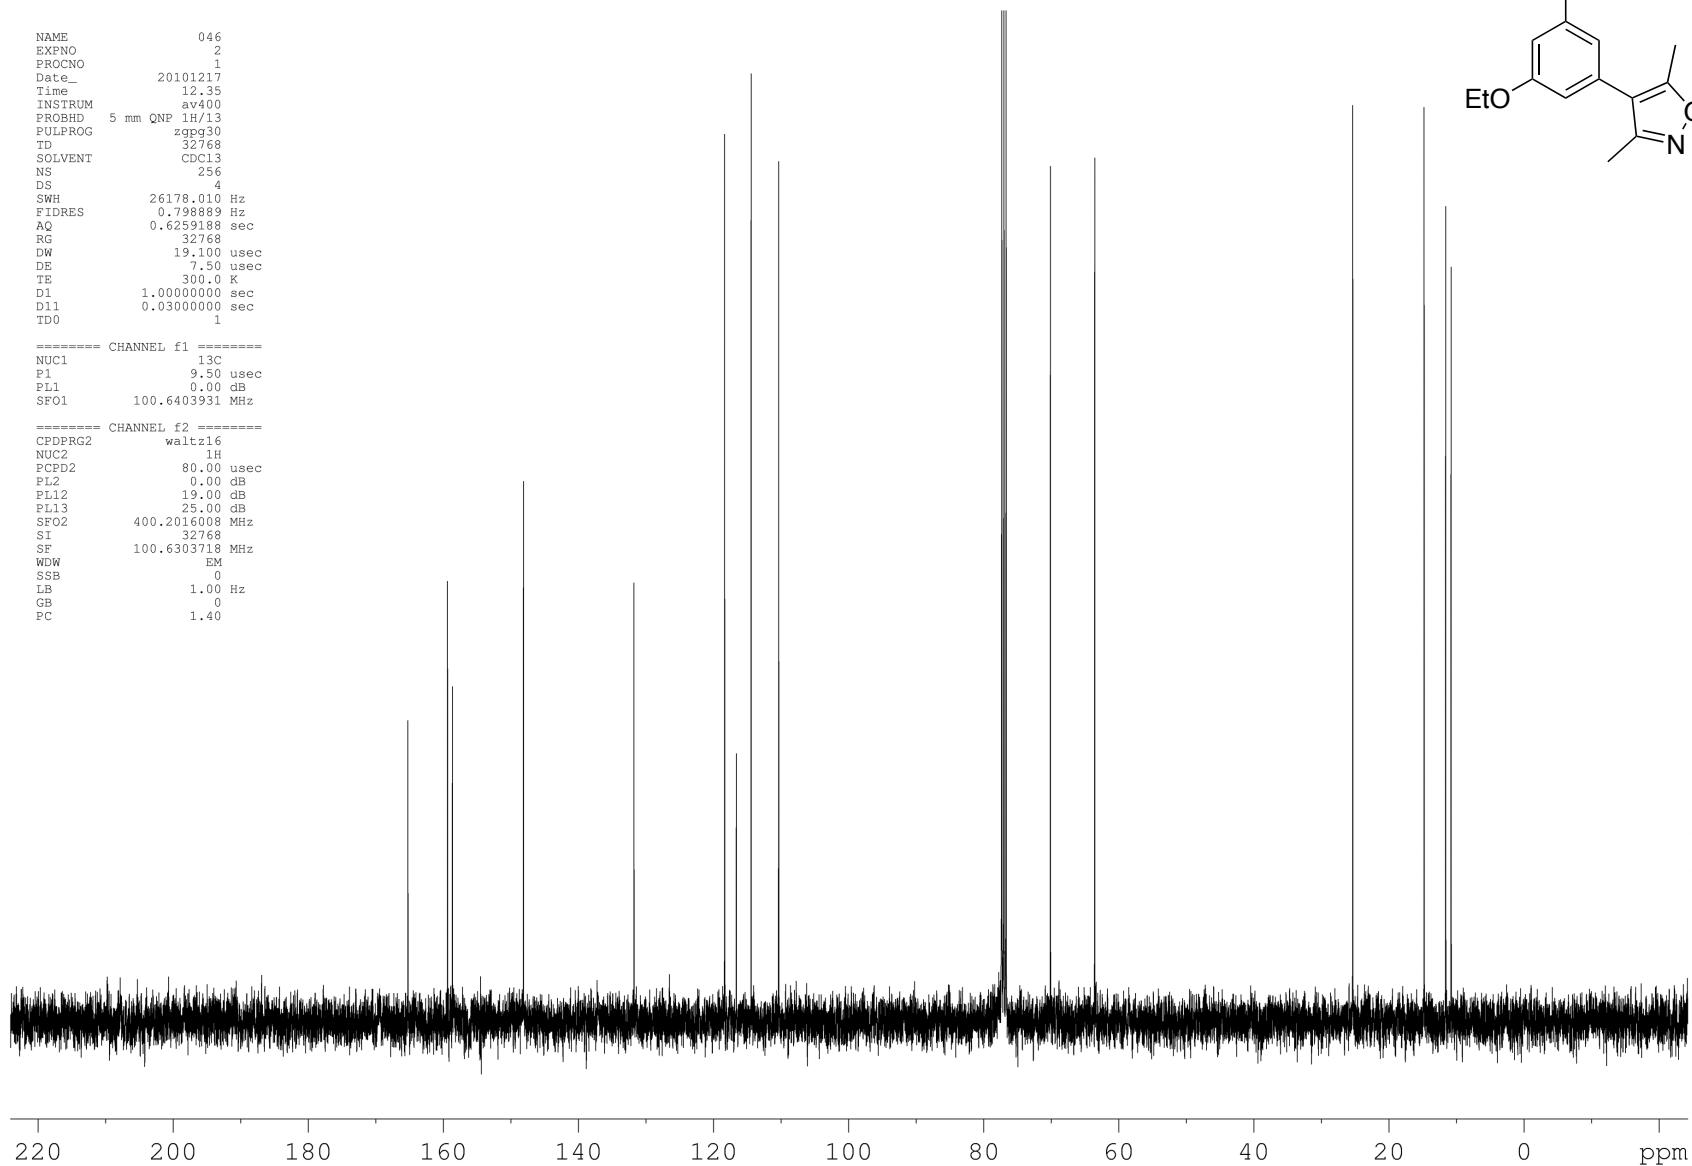



# 1-Bromo-3-ethoxybenzene 7

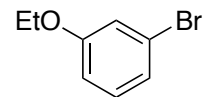

NAME 005 H and HMBC  
EXPNO 1  
PROCNO 1  
Date\_ 20101208  
Time 3.54  
INSTRUM avc500  
PROBHD 5 mm CPDUL 13C  
PULPROG zg30  
TD 65536  
SOLVENT CDCl3  
NS 16  
DS 2  
SWH 10330.578 Hz  
FIDRES 0.157632 Hz  
AQ 3.1719923 sec  
RG 4  
DW 48.400 usec  
DE 6.00 usec  
TE 298.0 K  
D1 1.00000000 sec  
TDO 1

===== CHANNEL f1 =====  
NUC1 1H  
P1 9.60 usec  
PL1 -6.00 dB  
PL1W 15.19999981 W  
SFO1 500.3030896 MHz  
SI 32768  
SF 500.3000240 MHz  
WDW EM  
SSB 0  
LB 0.30 Hz  
GB 0  
PC 1.00

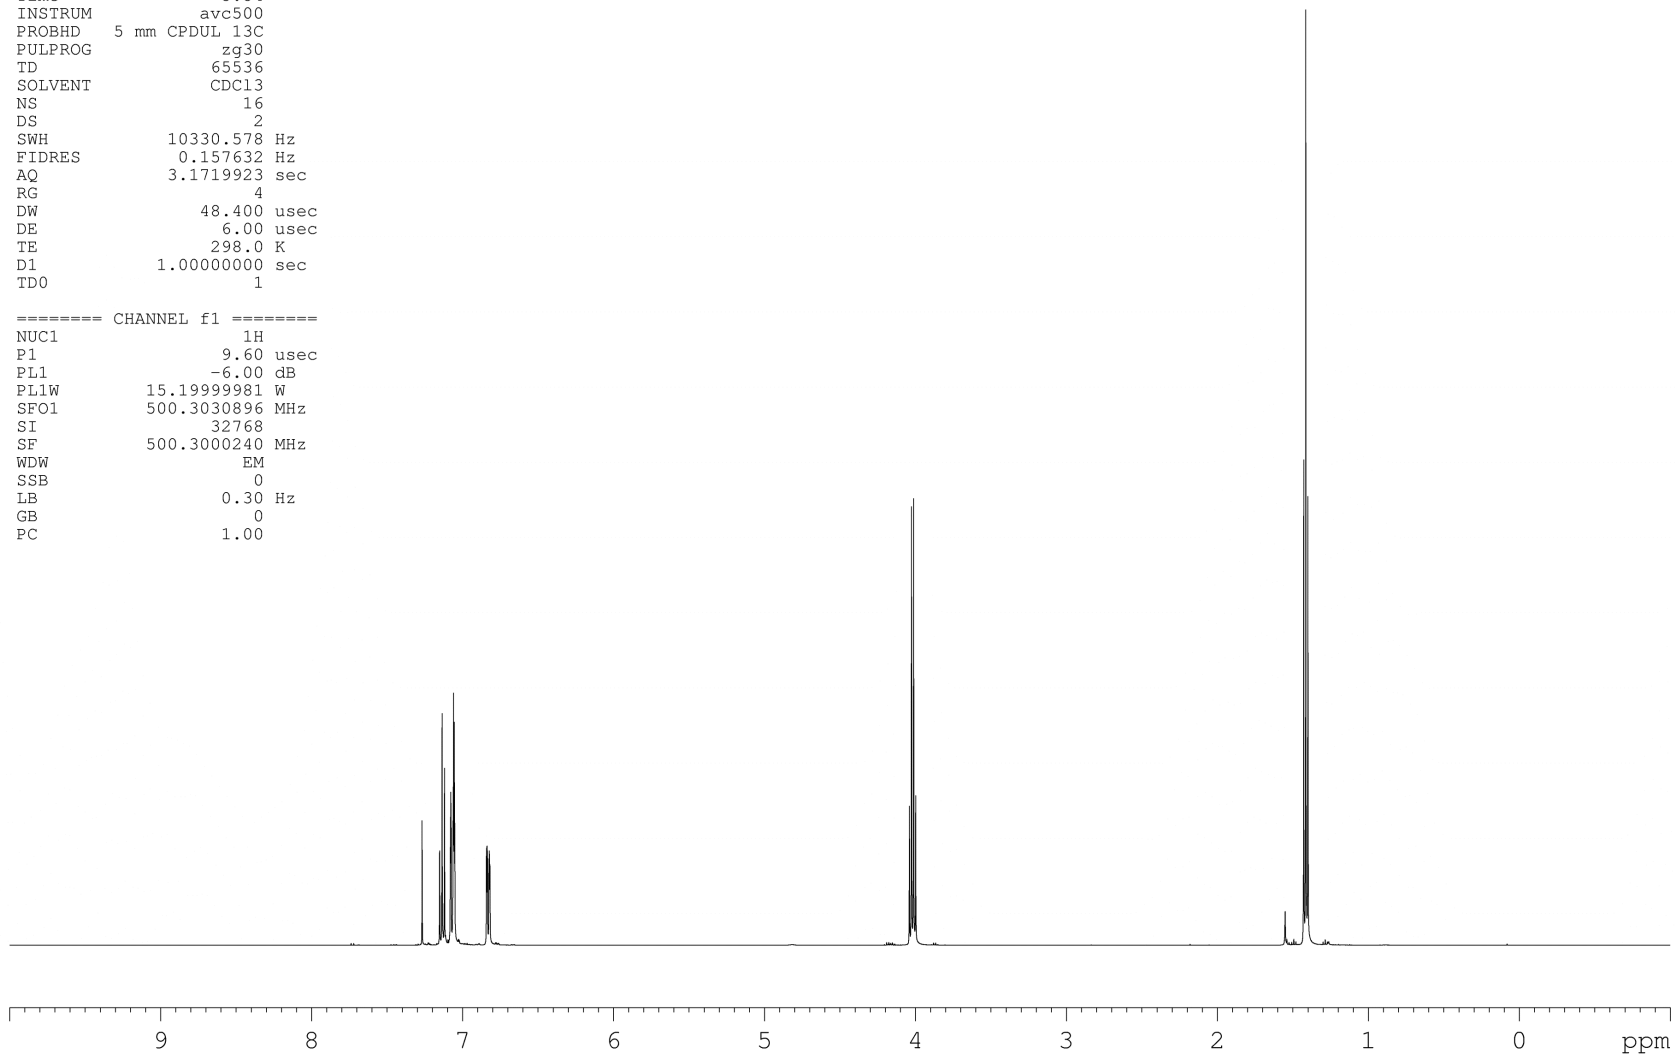

# 1-Bromo-3-ethoxybenzene 7

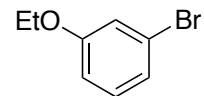

NAME 005  
EXPNO 2  
PROCNO 1  
Date\_ 20101011  
Time 16.19  
INSTRUM av400  
PROBHD 5 mm QNP 1H/13  
PULPROG zgpg30  
TD 32768  
SOLVENT CDC13  
NS 256  
DS 4  
SWH 26178.010 Hz  
FIDRES 0.798889 Hz  
AQ 0.6259188 sec  
RG 32768  
DW 19.100 usec  
DE 7.50 usec  
TE 300.0 K  
D1 1.00000000 sec  
D11 0.03000000 sec  
TD0 1

==== CHANNEL f1 =====  
NUC1 13C  
P1 9.50 usec  
PL1 0.00 dB  
SFO1 100.6403931 MHz

==== CHANNEL f2 =====  
CPDPRG2 waltz16  
NUC2 1H  
PCPD2 80.00 usec  
PL2 0.00 dB  
PL12 19.00 dB  
PL13 25.00 dB  
SFO2 400.2016008 MHz  
SI 32768  
SF 100.6303718 MHz  
WDW EM  
SSB 0  
LB 1.00 Hz  
GB 0  
PC 1.40

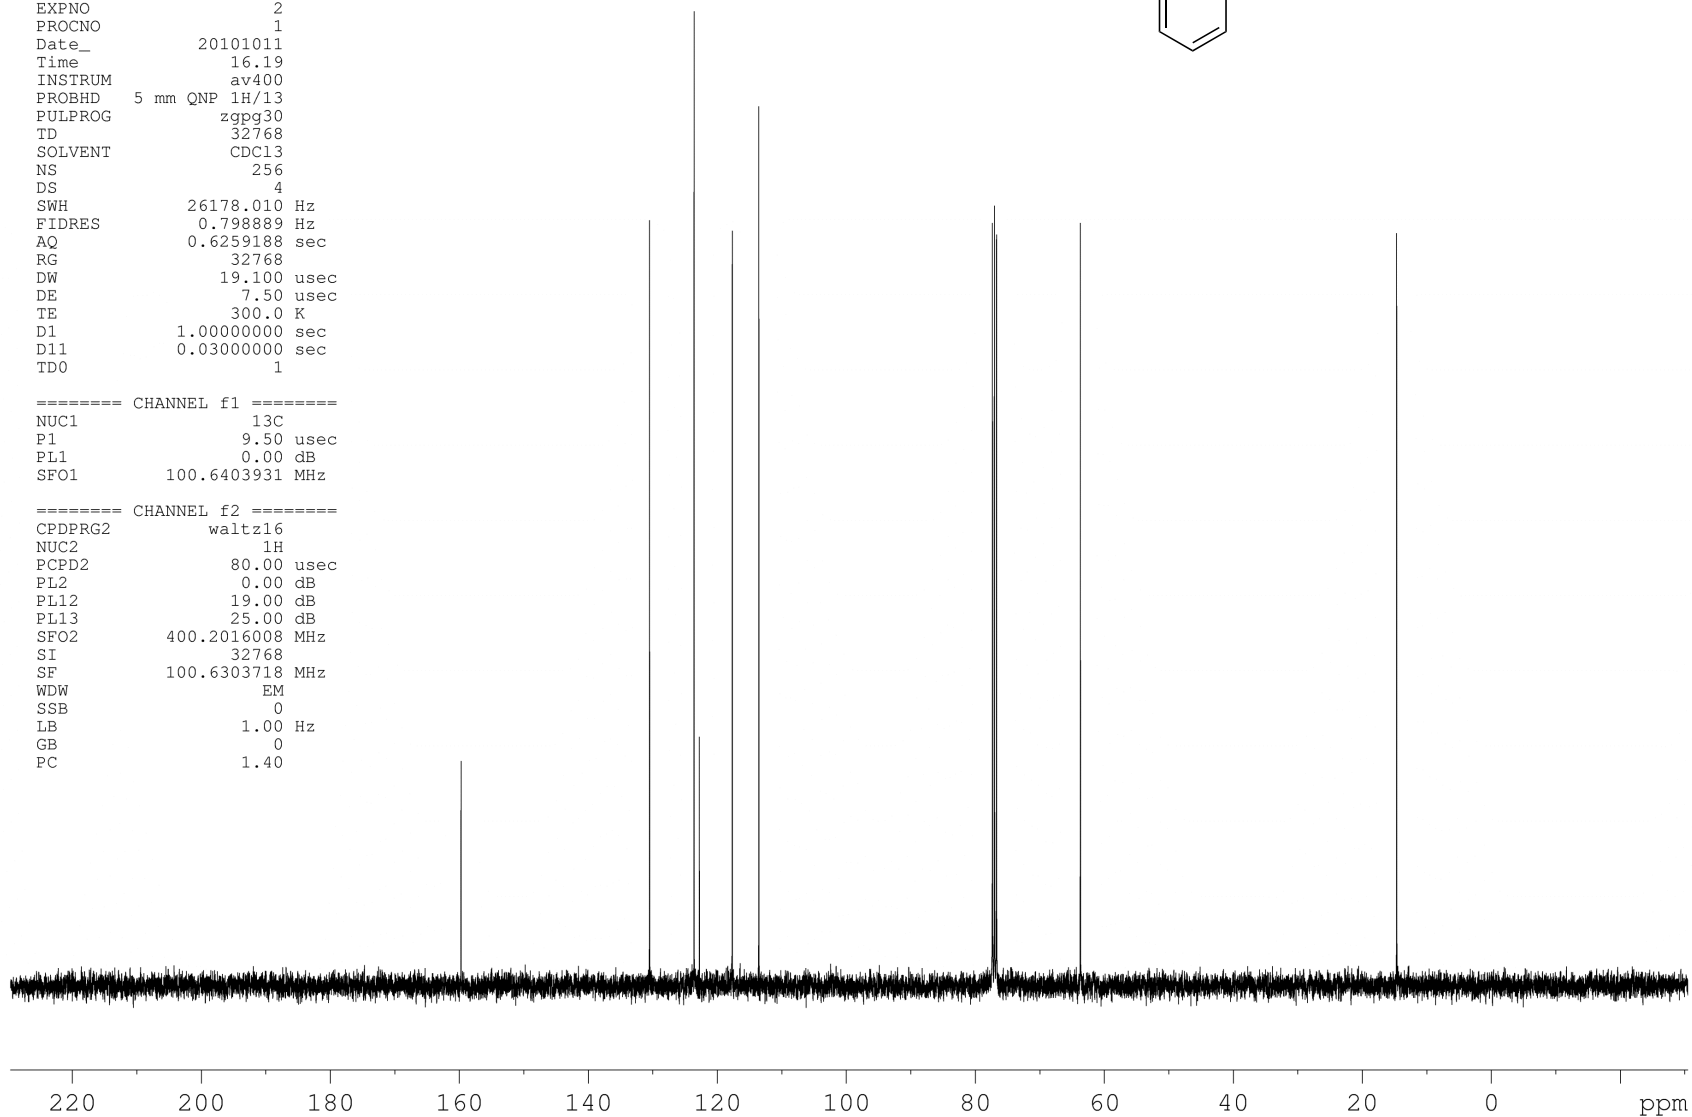

# Ethyl 3-bromo-5-ethoxybenzoate 10

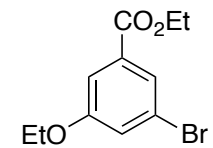

NAME 009 H and HMBC  
EXPNO 1  
PROCNO 1  
Date\_ 20101208  
Time 4.31  
INSTRUM avc500  
PROBHD 5 mm CPDUL 13C  
PULPROG zg30  
TD 65536  
SOLVENT CDCl3  
NS 16  
DS 2  
SWH 10330.578 Hz  
FIDRES 0.157632 Hz  
AQ 3.1719923 sec  
RG 4  
DW 48.400 usec  
DE 6.00 usec  
TE 298.0 K  
D1 1.00000000 sec  
TDO 1

===== CHANNEL f1 =====  
NUC1 1H  
P1 9.60 usec  
PL1 -6.00 dB  
PL1W 15.19999981 W  
SFO1 500.3030896 MHz  
SI 32768  
SF 500.3000240 MHz  
WDW EM  
SSB 0  
LB 0.30 Hz  
GB 0  
PC 1.00

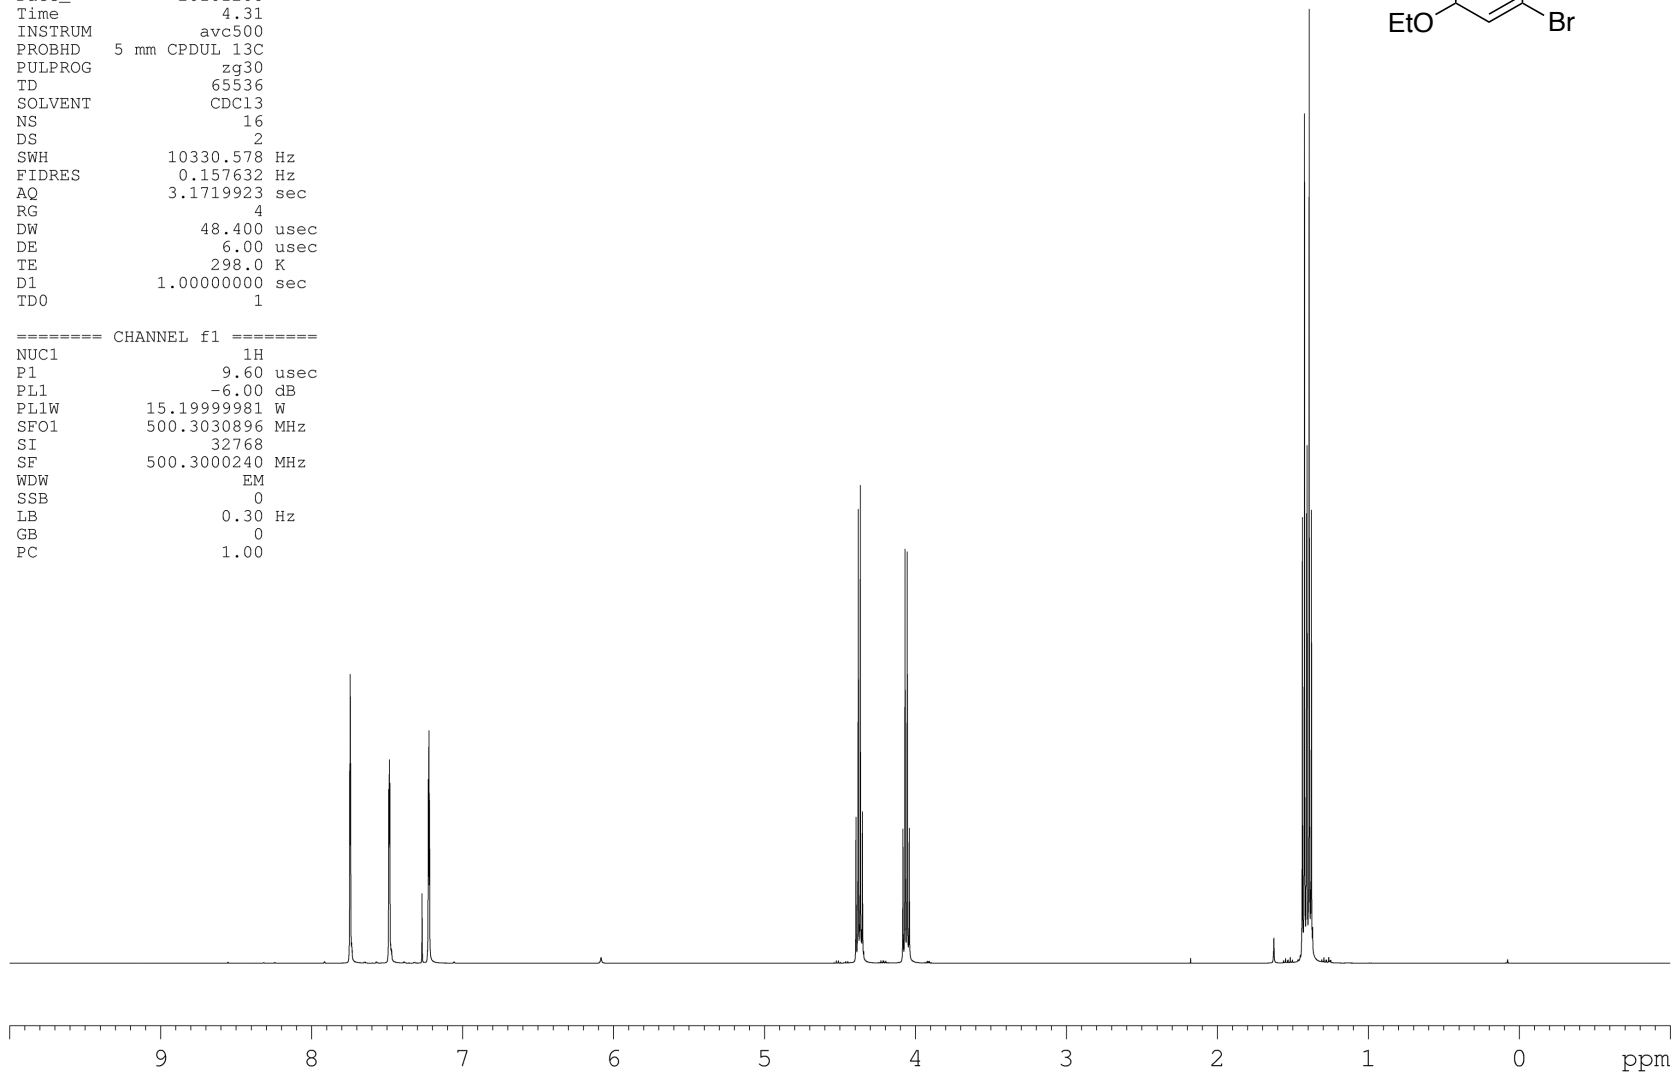

# Ethyl 3-bromo-5-ethoxybenzoate 10

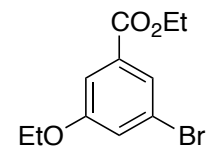

```
NAME          009
EXPNO         2
PROCNO        1
Date_         20101013
Time         12.01
INSTRUM       av400
PROBHD        5 mm QNP 1H/13
PULPROG       zgpg30
TD            32768
SOLVENT       CDCl3
NS            256
DS            4
SMH           26178.010 Hz
FIDRES        0.798889 Hz
AQ            0.6259188 sec
RG            32768
DW            19.100 usec
DE            7.50 usec
TE            300.0 K
D1            1.0000000 sec
D11           0.0300000 sec
TD0           1

===== CHANNEL f1 =====
NUC1          13C
P1            9.50 usec
PL1           0.00 dB
SFO1         100.6403931 MHz

===== CHANNEL f2 =====
CPDPRG2       waltz16
NUC2          1H
PCPD2         80.00 usec
PL2           0.00 dB
PL12          19.00 dB
PL13          25.00 dB
SFO2         400.2016008 MHz
SI            32768
SF           100.6303718 MHz
WDW           EM
SSB           0
LB            1.00 Hz
GB            0
FC            1.40
```

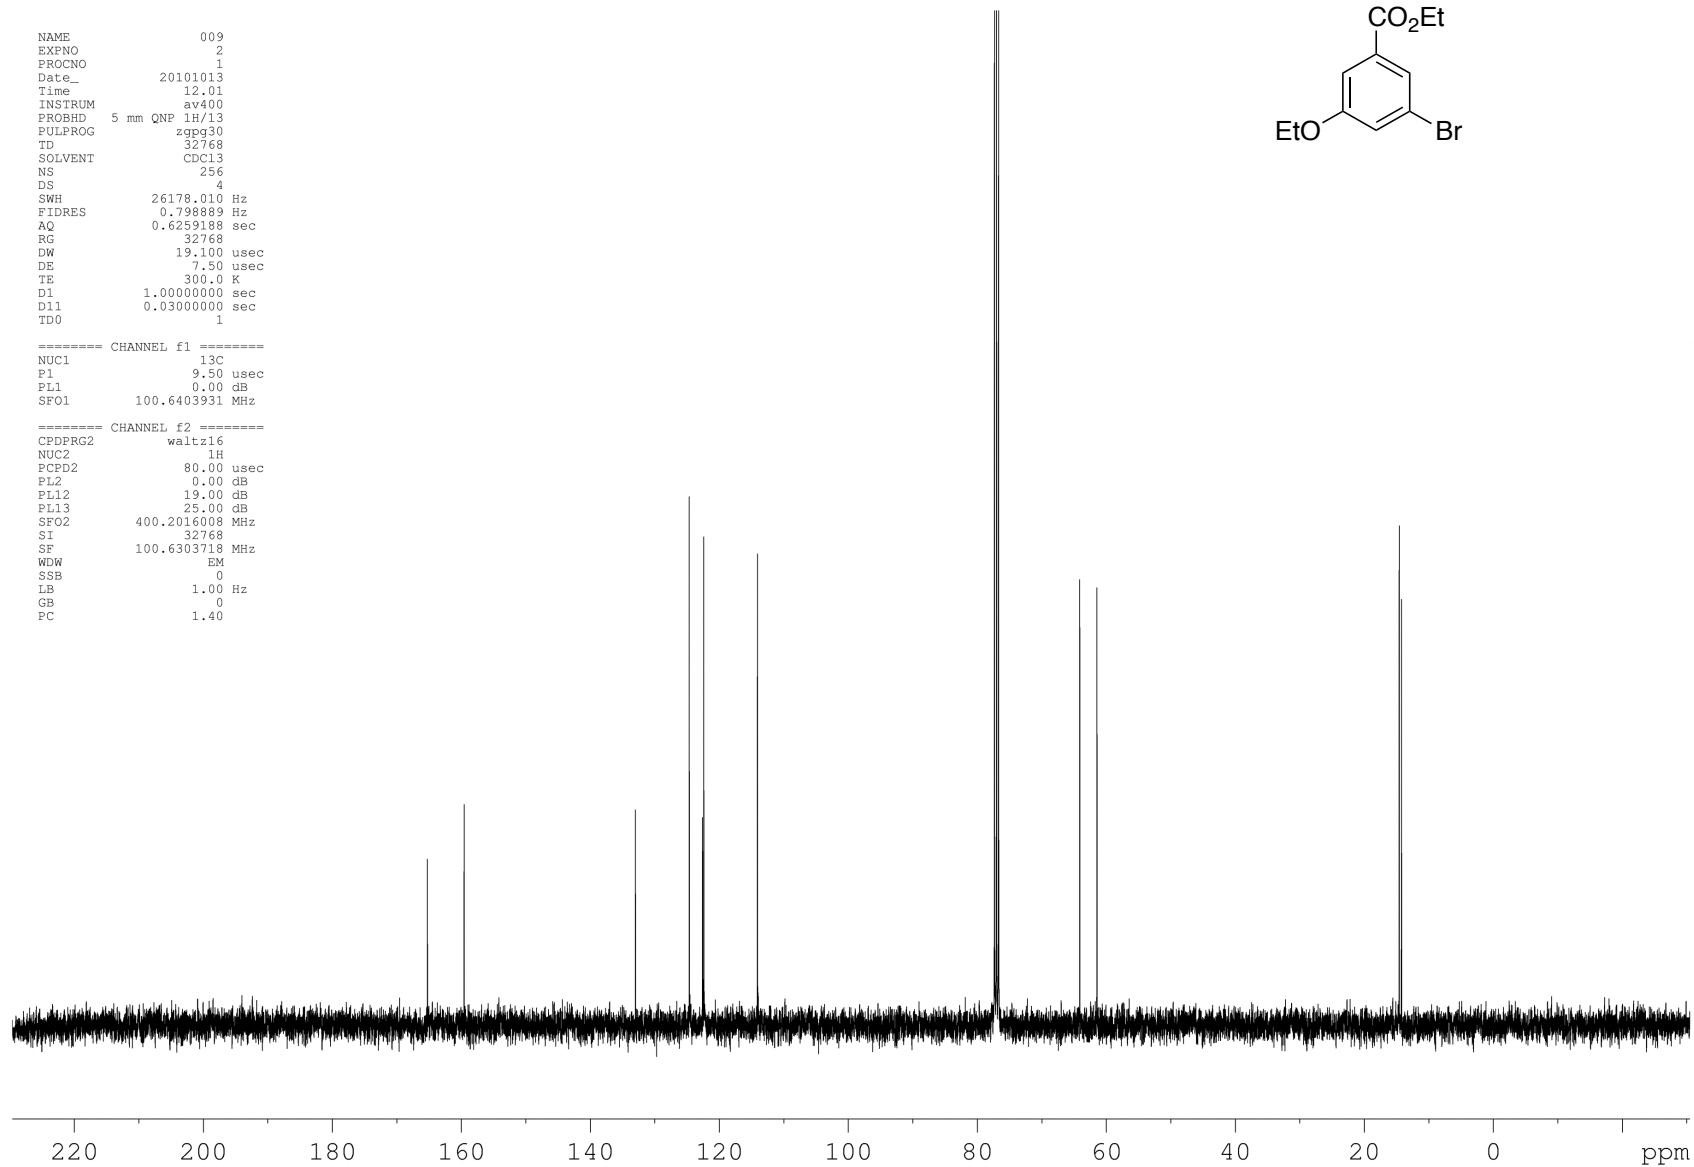

### 3-Bromo-5-ethoxybenzoic acid 11

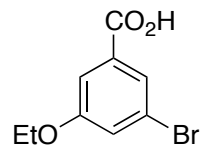

NAME 014  
EXPNO 1  
PROCNO 1  
Date\_ 20101101  
Time 11.16  
INSTRUM av400  
PROBHD 5 mm QNP 1H/13  
PULPROG zg60  
TD 65536  
SOLVENT CDC13  
NS 16  
DS 2  
SWH 8278.146 Hz  
FIDRES 0.126314 Hz  
AQ 3.9584243 sec  
RG 512  
DW 60.400 usec  
DE 7.50 usec  
TE 300.0 K  
D1 1.00000000 sec

===== CHANNEL f1 =====  
NUC1 1H  
P1 9.00 usec  
PL1 0.00 dB  
SFO1 400.2024714 MHz  
SI 32768  
SF 400.2000028 MHz  
WDW EM  
SSB 0  
LB 0.30 Hz  
GB 0  
PC 1.00

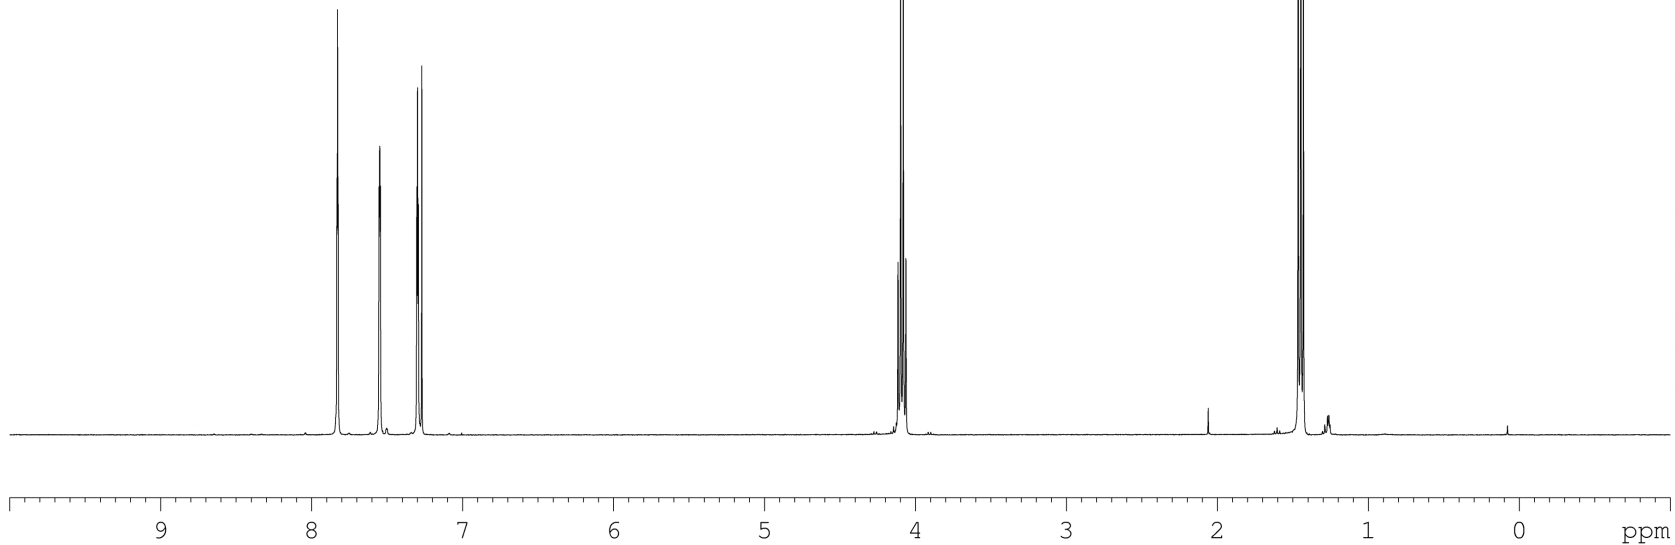

# 3-Bromo-5-ethoxybenzoic acid 11

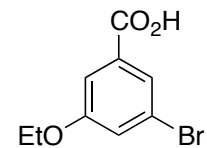

NAME 014 C  
EXPNO 1  
PROCNO 1  
Date\_ 20101101  
Time 17.36  
INSTRUM avc500  
PROBHD 5 mm CPDUL 13C  
PULPROG zgpg30  
TD 65536  
SOLVENT CDC13  
NS 512  
DS 2  
SWH 31250.000 Hz  
FIDRES 0.476837 Hz  
AQ 1.0486259 sec  
RG 912  
DW 16.000 usec  
DE 20.00 usec  
TE 298.1 K  
D1 2.00000000 sec  
D11 0.03000000 sec  
TD0 1

===== CHANNEL f1 =====  
NUC1 13C  
P1 9.50 usec  
PL1 -4.40 dB  
PL1W 28.15752029 W  
SFO1 125.8131151 MHz

===== CHANNEL f2 =====  
CPDPRG2 waltz16  
NUC2 1H  
PCPD2 80.00 usec  
PL2 -6.00 dB  
PL12 12.42 dB  
PL13 18.42 dB  
PL2W 15.19999981 W  
PL12W 0.21869738 W  
PL13W 0.05493430 W  
SFO2 500.3020012 MHz  
SI 32768  
SF 125.8005438 MHz  
WDW EM  
SSB 0  
LB 1.00 Hz  
GB 0  
PC 1.40

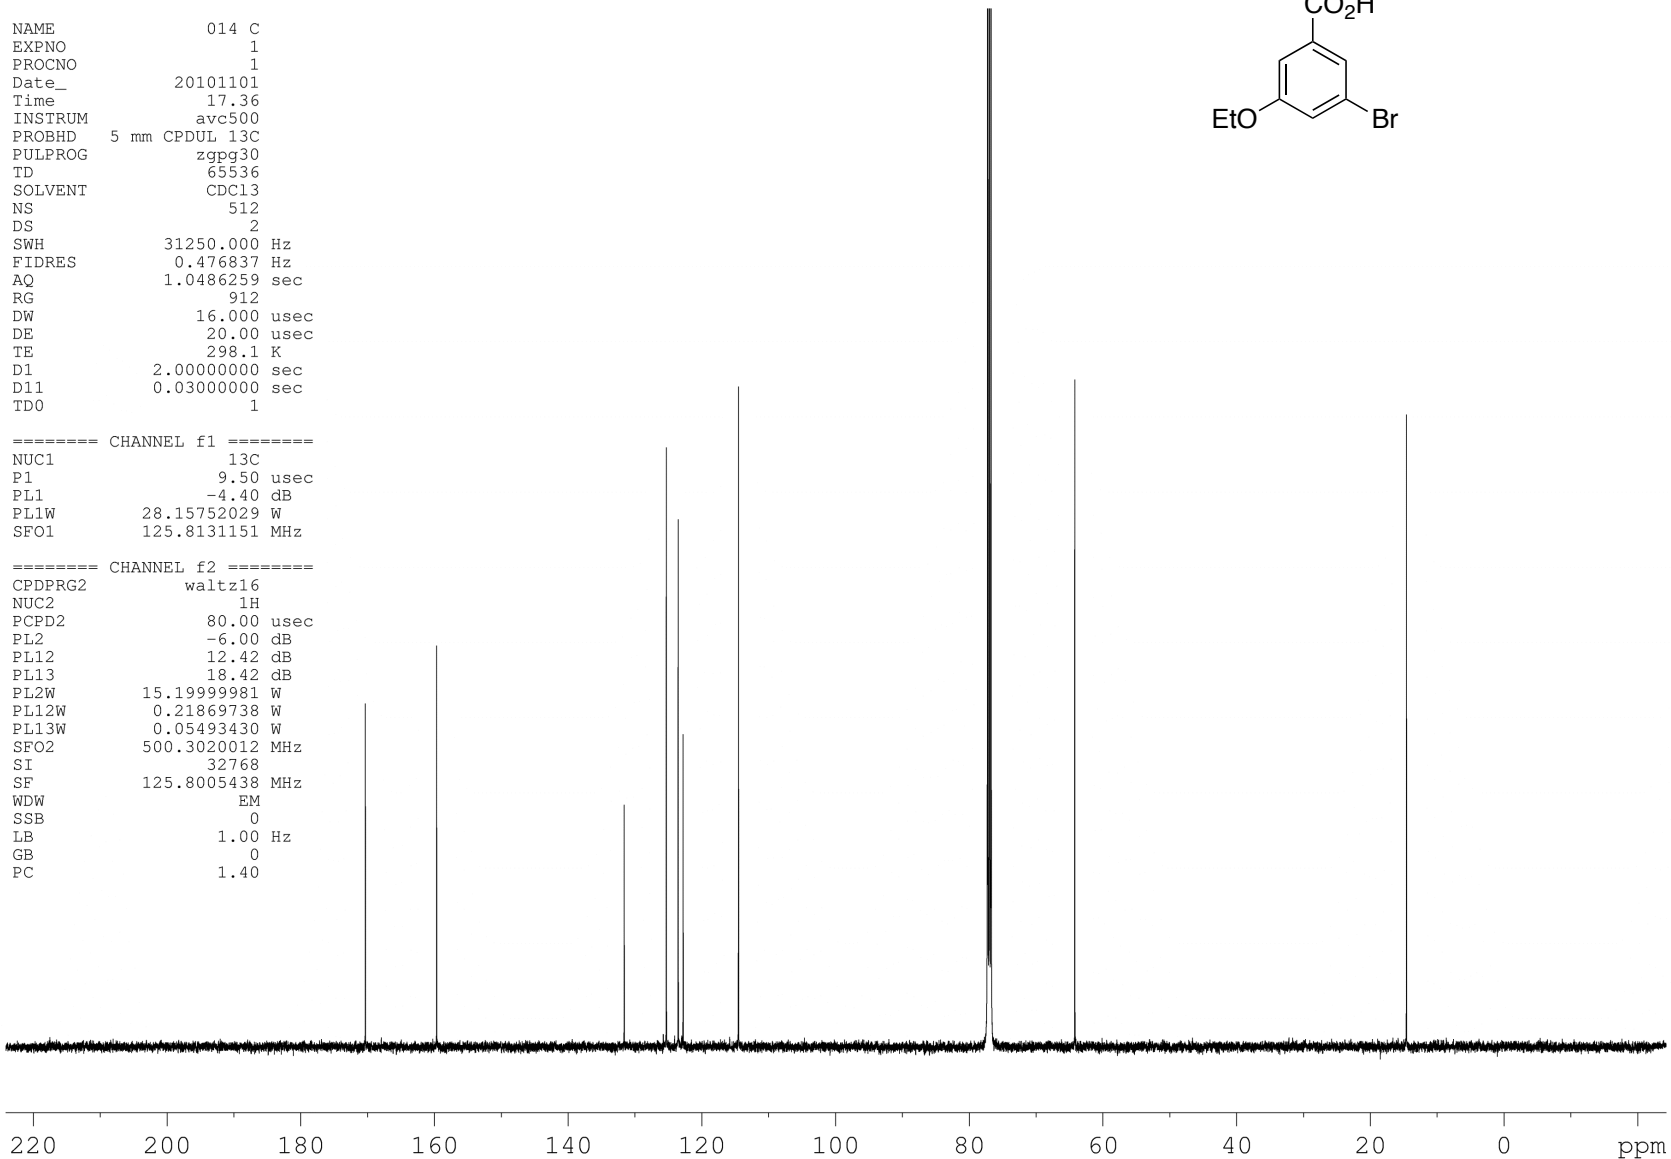

### 3-Bromo-5-ethoxy-N-methoxy-N-methylbenzamide 12

NAME 022 H and HMBC  
EXPNO 1  
PROCNO 1  
Date\_ 20101208  
Time 5.45  
INSTRUM avc500  
PROBHD 5 mm CPDUL 13C  
PULPROG zg30  
TD 65536  
SOLVENT CDCl3  
NS 16  
DS 2  
SWH 10330.578 Hz  
FIDRES 0.157632 Hz  
AQ 3.1719923 sec  
RG 4  
DW 48.400 usec  
DE 6.00 usec  
TE 298.0 K  
D1 1.00000000 sec  
TD0 1

===== CHANNEL f1 =====  
NUC1 1H  
P1 9.60 usec  
PL1 -6.00 dB  
PL1W 15.19999981 W  
SF01 500.3030896 MHz  
SI 32768  
SF 500.3000240 MHz  
WDW EM  
SSB 0  
LB 0.30 Hz  
GB 0  
PC 1.00

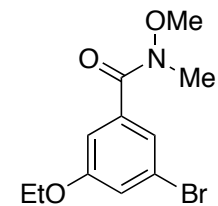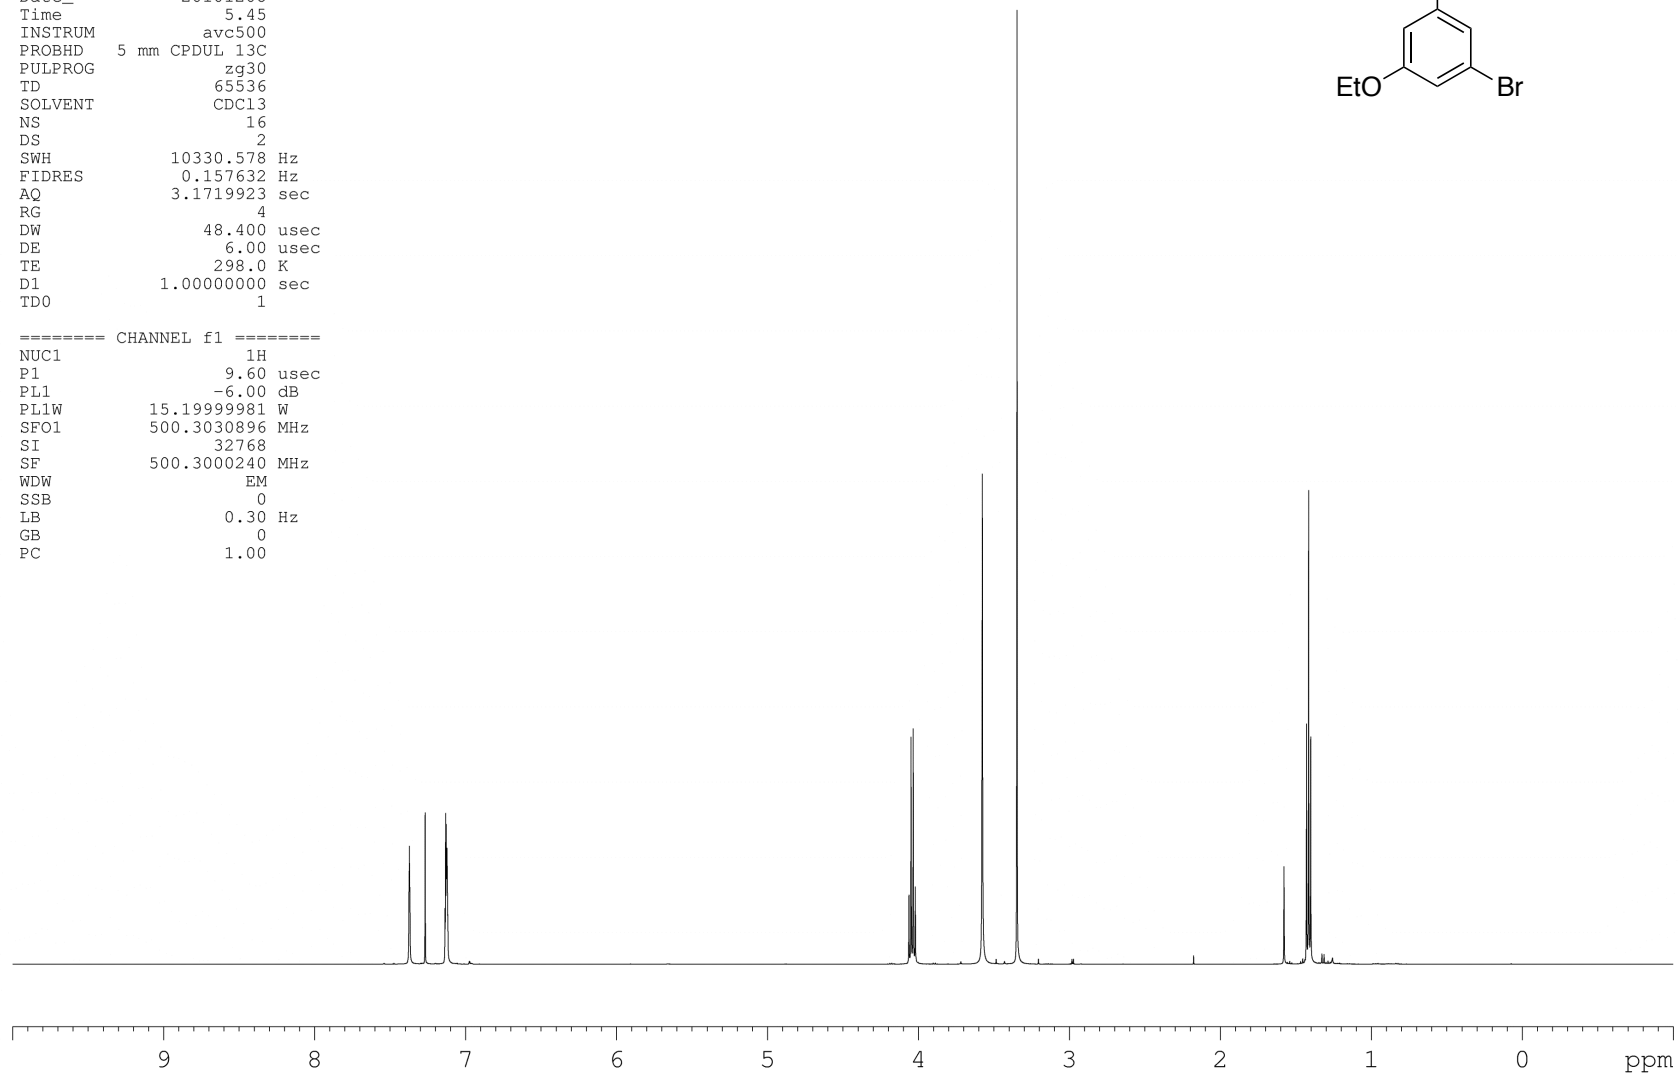

# 3-Bromo-5-ethoxy-N-methoxy-N-methylbenzamide 12

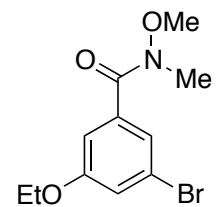

NAME 022  
EXPNO 2  
PROCNO 1  
Date\_ 20101106  
Time 12.10  
INSTRUM av400  
PROBHD 5 mm QNP 1H/13  
FULPROG zgpg30  
TD 32768  
SOLVENT CDCl3  
NS 256  
DS 4  
SWH 26178.010 Hz  
FIDRES 0.798889 Hz  
AQ 0.6259188 sec  
RG 32768  
DW 19.100 usec  
DE 7.50 usec  
TE 300.0 K  
D1 1.00000000 sec  
D11 0.03000000 sec  
TD0 1

===== CHANNEL f1 =====  
NUC1 13C  
P1 9.50 usec  
PL1 0.00 dB  
SFO1 100.6403931 MHz  
===== CHANNEL f2 =====  
CPDPRG2 waltz16  
NUC2 1H  
PCPD2 80.00 usec  
PL2 0.00 dB  
PL12 19.00 dB  
PL13 25.00 dB  
SFO2 400.2016008 MHz  
SI 32768  
SF 100.6303718 MHz  
WDW EM  
SSB 0  
LB 1.00 Hz  
GB 0  
PC 1.40

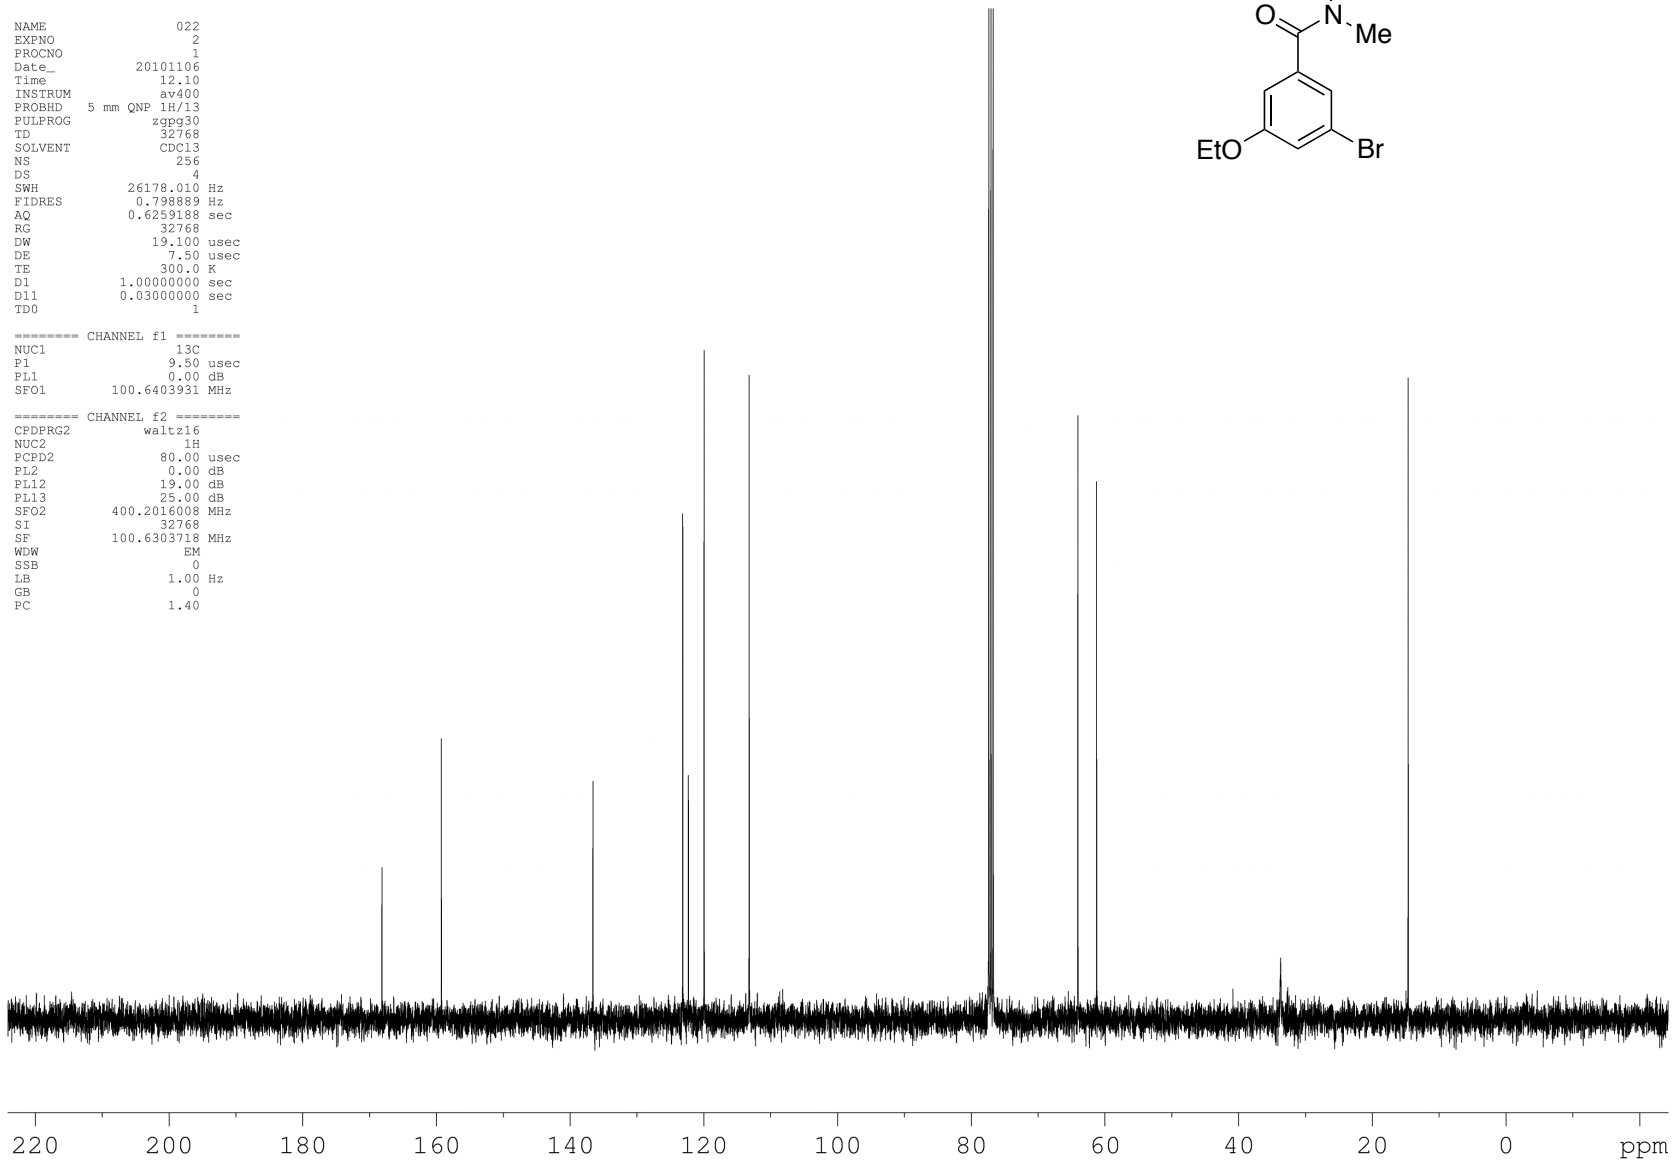



# 1-(3-Bromo-5-ethoxyphenyl)ethanone 13

NAME 027  
EXPNO 1  
PROCNO 1  
Date\_ 20101111  
Time 1.29  
INSTRUM av400  
PROBHD 5 mm QNP 1H/13  
PULPROG zg60  
TD 65536  
SOLVENT CDC13  
NS 16  
DS 2  
SWH 8278.146 Hz  
FIDRES 0.126314 Hz  
AQ 3.9584243 sec  
RG 228.1  
DW 60.400 usec  
DE 7.50 usec  
TE 300.0 K  
D1 1.00000000 sec

===== CHANNEL f1 =====  
NUC1 1H  
P1 9.00 usec  
PL1 0.00 dB  
SFO1 400.2024714 MHz  
SI 32768  
SF 400.2000028 MHz  
WDW EM  
SSB 0  
LB 0.30 Hz  
GB 0  
PC 1.00

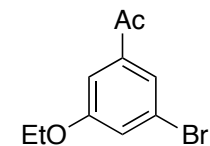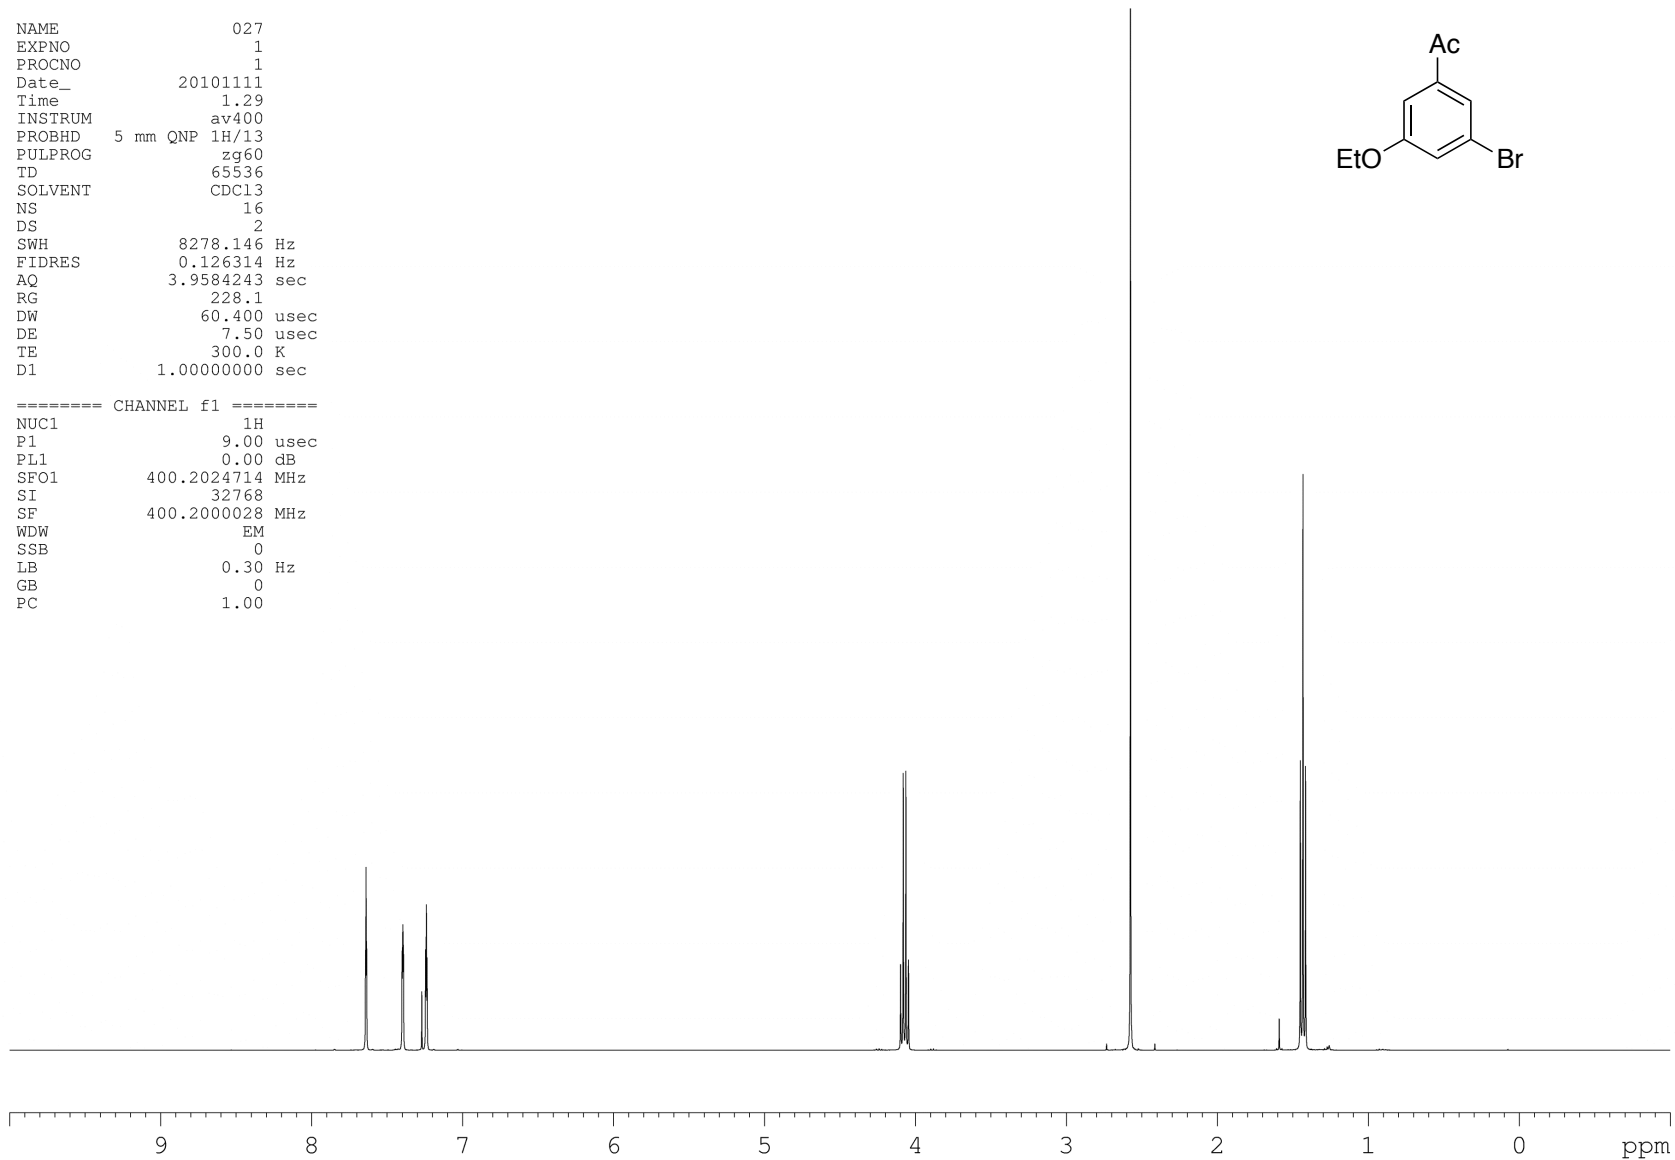

# 1-(3-Bromo-5-ethoxyphenyl)ethanone 13

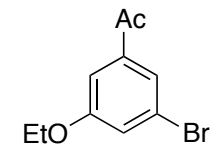

NAME 027  
EXPNO 2  
PROCNO 1  
Date\_ 20101111  
Time 1.37  
INSTRUM av400  
PROBHD 5 mm QNP 1H/13  
FULPROG zgpg30  
TD 32768  
SOLVENT CDCl3  
NS 256  
DS 4  
SWH 26178.010 Hz  
FIDRES 0.798889 Hz  
AQ 0.6259188 sec  
RG 32768  
DW 19.100 usec  
DE 7.500 usec  
TE 300.0 K  
D1 1.00000000 sec  
D11 0.03000000 sec  
TD0 1

===== CHANNEL f1 =====  
NUC1 13C  
P1 9.50 usec  
PL1 0.00 dB  
SFO1 100.6403931 MHz  
===== CHANNEL f2 =====  
CPDPRG2 waltz16  
NUC2 1H  
PCPD2 80.00 usec  
PL2 0.00 dB  
PL12 19.00 dB  
PL13 25.00 dB  
SFO2 400.2016008 MHz  
SI 32768  
SF 100.6303718 MHz  
WDW EM  
SSB 0  
LB 1.00 Hz  
GB 0  
PC 1.40

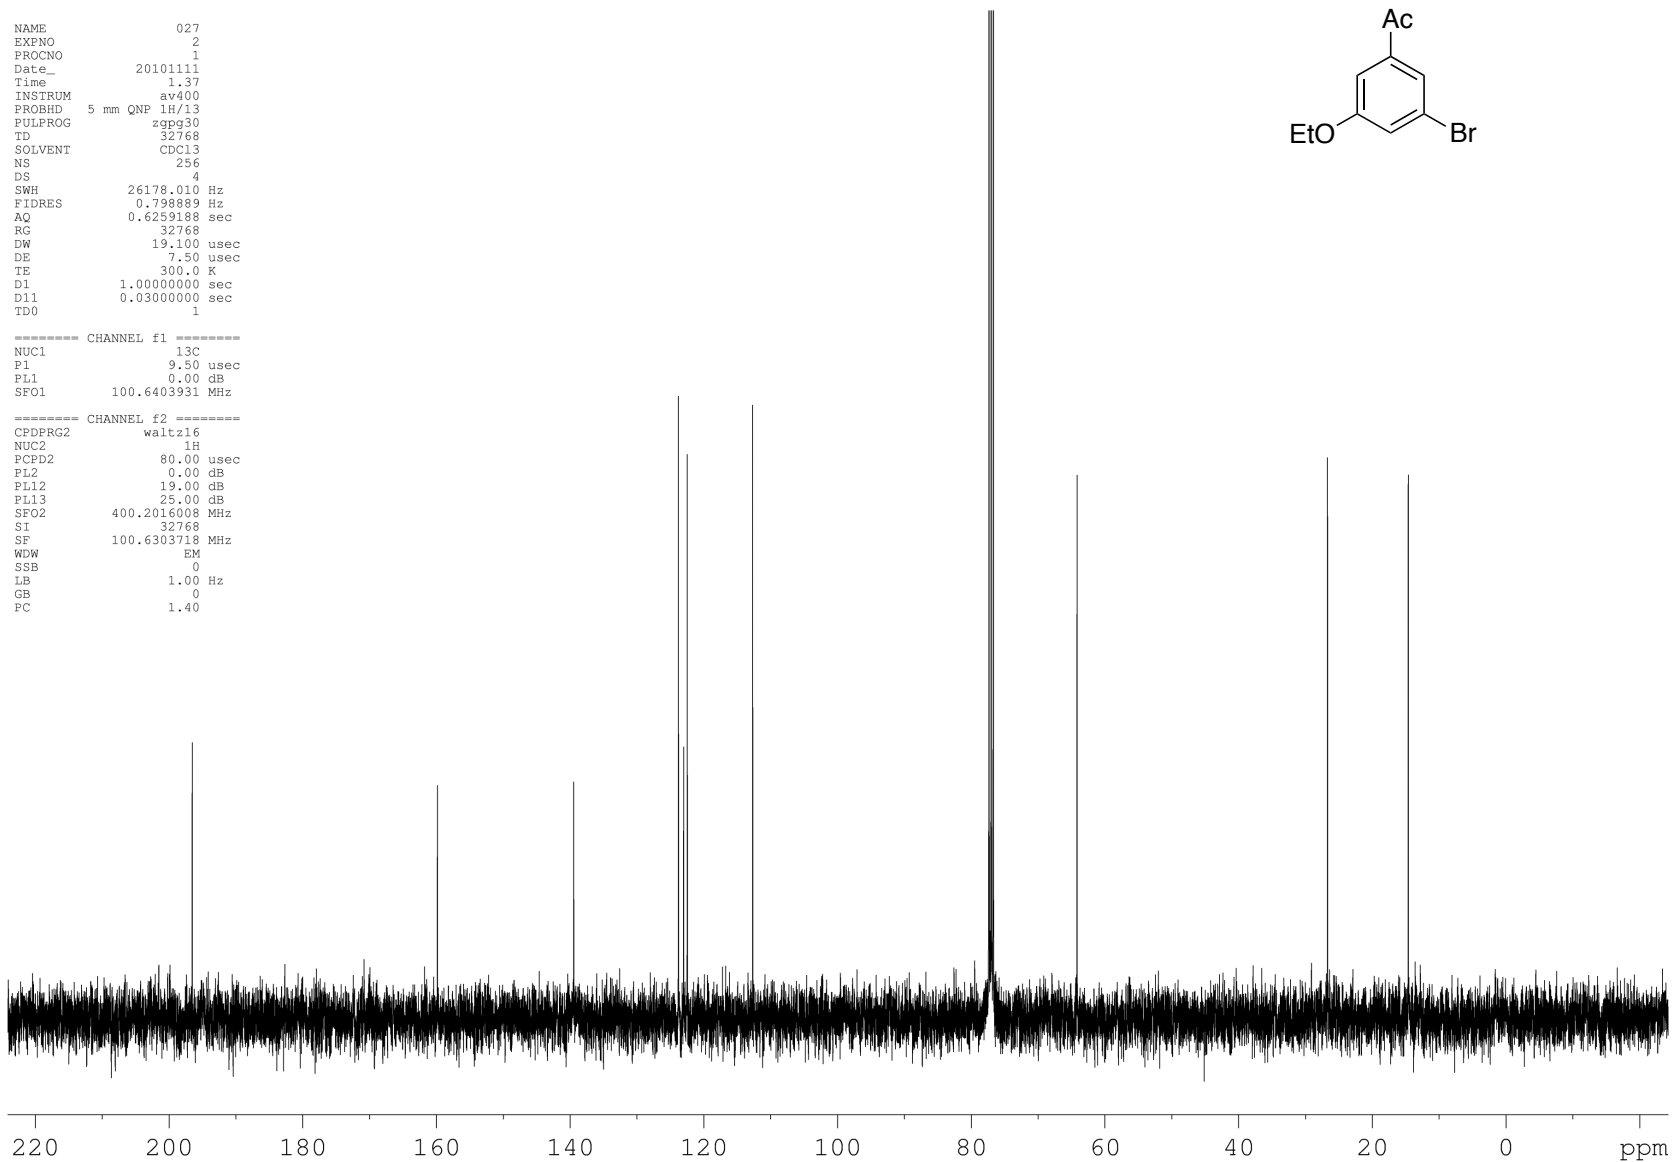

Supplement: jm200640v_si_001.pdf [file jm200640v_si_001.pdf]
